# Supplementary material for: A co-expression network for differentially expressed genes in bladder cancer and a risk score model for predicting survival
Source: Hereditas. 2019 Jul 9;156:24. doi: 10.1186/s41065-019-0100-1 (PMC6617625; doi:10.1186/s41065-019-0100-1)
Supplement: Supplementary file 4 — KEGG and GO enrichment analyses for 1064 DEGs. (XLS 378 kb) [file 41065_2019_100_MOESM4_ESM.xls]

## Sheet: Supplementary_File_3
Supplementary File 1. KEGG and GO enrichment analyses for 1064 DEGs.
ID	Description	GeneRatio	BgRatio	pvalue	p.adjust	qvalue	geneID	Count
hsa05410	Hypertrophic cardiomyopathy (HCM)	26/480	83/7430	4.57855e-12	7.56402e-10	5.41541e-10	ACTC1/CACNA1C/CACNA2D1/CACNB2/CACNB4/DES/DMD/IL6/ITGA1/ITGA5/ITGA7/ITGA8/ITGA9/LAMA2/PRKAA2/PRKAG2/RYR2/SGCA/SGCB/SGCD/SGCG/SLC8A1/TGFB3/TNNT2/TPM1/TPM2	26
hsa05414	Dilated cardiomyopathy (DCM)	27/480	90/7430	5.56178e-12	7.56402e-10	5.41541e-10	ACTC1/ADCY5/ADCY9/CACNA1C/CACNA2D1/CACNB2/CACNB4/DES/DMD/ITGA1/ITGA5/ITGA7/ITGA8/ITGA9/LAMA2/PLN/PRKACB/RYR2/SGCA/SGCB/SGCD/SGCG/SLC8A1/TGFB3/TNNT2/TPM1/TPM2	27
hsa04022	cGMP-PKG signaling pathway	34/480	163/7430	6.29202e-10	5.70476e-08	4.08429e-08	ADCY5/ADCY9/ADRB3/AGTR1/AKT3/ATP1A2/ATP2B4/BDKRB2/CACNA1C/EDNRA/EDNRB/ITPR1/ITPR3/KCNMA1/KCNMB1/MEF2C/MEF2D/MRVI1/MYL9/MYLK/NFATC1/NFATC2/NFATC4/NPR1/PDE2A/PDE5A/PLCB4/PLN/PPP1R12A/PRKG1/RGS2/SLC25A4/SLC8A1/SRF	34
hsa04020	Calcium signaling pathway	36/480	182/7430	9.16546e-10	6.23251e-08	4.46213e-08	ADCY9/ADRB3/AGTR1/ATP2B4/BDKRB1/BDKRB2/CACNA1C/CACNA1H/CAMK2A/CHRM2/CHRM3/EDNRA/EDNRB/GNAL/GRIN2D/ITPKB/ITPR1/ITPR3/MYLK/P2RX1/PDE1A/PDE1C/PDGFRA/PLCB4/PLCD4/PLN/PRKACB/PRKCB/PTGER3/PTGFR/RYR2/RYR3/SLC25A4/SLC8A1/TACR2/TACR3	36
hsa04921	Oxytocin signaling pathway	32/480	152/7430	1.60021e-09	8.70517e-08	6.23241e-08	ADCY5/ADCY9/CACNA1C/CACNA2D1/CACNB2/CACNB4/CAMK2A/CDKN1A/FOS/GNAO1/ITPR1/ITPR3/JUN/MEF2C/MYL9/MYLK/NFATC1/NFATC2/NFATC4/NPR1/PLCB4/PPP1R12A/PPP1R12B/PRKAA2/PRKACB/PRKAG2/PRKCB/PTGS2/RCAN1/RGS2/RYR2/RYR3	32
hsa04110	Cell cycle	28/480	124/7430	3.30186e-09	1.49684e-07	1.07166e-07	ABL1/BUB1/BUB1B/CCNA2/CCNB1/CCNB2/CCND2/CCNE1/CDC20/CDC45/CDC6/CDK1/CDKN1A/E2F1/GADD45B/MAD2L1/MCM2/MCM4/MYC/ORC6/PCNA/PKMYT1/PLK1/PTTG1/SKP2/TGFB3/TTK/WEE1	28
hsa04270	Vascular smooth muscle contraction	26/480	121/7430	3.63082e-08	1.41083e-06	1.01008e-06	ACTA2/ACTG2/ADCY5/ADCY9/AGTR1/CACNA1C/CALD1/EDNRA/ITPR1/ITPR3/KCNMA1/KCNMB1/MRVI1/MYH11/MYL9/MYLK/NPR1/PLA2G5/PLCB4/PPP1R12A/PPP1R12B/PPP1R14A/PRKACB/PRKCB/PRKG1/RAMP1	26
hsa05412	Arrhythmogenic right ventricular cardiomyopathy (ARVC)	19/480	72/7430	8.29341e-08	2.81976e-06	2.01879e-06	ACTN2/CACNA1C/CACNA2D1/CACNB2/CACNB4/DES/DMD/ITGA1/ITGA5/ITGA7/ITGA8/ITGA9/LAMA2/RYR2/SGCA/SGCB/SGCD/SGCG/SLC8A1	19
hsa04713	Circadian entrainment	22/480	96/7430	1.24285e-07	3.4426e-06	2.46471e-06	ADCY5/ADCY9/CACNA1C/CACNA1H/CAMK2A/FOS/GNAO1/GNG11/GNG7/GRIN2D/ITPR1/ITPR3/PER1/PER2/PER3/PLCB4/PRKACB/PRKCB/PRKG1/RPS6KA5/RYR2/RYR3	22
hsa04510	Focal adhesion	34/480	199/7430	1.26566e-07	3.4426e-06	2.46471e-06	AKT3/BCL2/CCND2/COL4A6/FLNA/FLNC/FYN/ILK/ITGA1/ITGA5/ITGA7/ITGA8/ITGA9/JUN/LAMA2/LAMA4/LAMB2/LAMC3/MYL9/MYLK/PARVA/PDGFD/PDGFRA/PPP1R12A/PPP1R12B/PRKCB/RAC3/RAP1A/THBS1/TLN1/TNXB/VCL/VEGFD/VWF	34
hsa04010	MAPK signaling pathway	42/480	295/7430	7.98263e-07	1.97362e-05	1.413e-05	AKT3/CACNA1C/CACNA1H/CACNA2D1/CACNB2/CACNB4/DUSP1/DUSP2/DUSP5/FGF10/FGF2/FGF7/FGFR1/FLNA/FLNC/FOS/GADD45B/HSPA2/JUN/JUND/MAP3K20/MAP3K8/MAPT/MEF2C/MRAS/MYC/NFATC1/NR4A1/PDGFD/PDGFRA/PRKACB/PRKCB/RAC3/RAP1A/RASGRP2/RPS6KA2/RPS6KA5/SRF/STMN1/TGFB3/TGFBR2/VE	42
hsa05166	HTLV-I infection	38/480	255/7430	8.70714e-07	1.97362e-05	1.413e-05	ADCY5/ADCY9/AKT3/ATF3/BUB1B/CCNB2/CCND2/CDC20/CDKN1A/CREM/E2F1/EGR1/EGR2/ETS2/FOS/FOSL1/FZD7/IL6/JUN/MAD2L1/MRAS/MYBL2/MYC/NFATC1/NFATC2/NFATC4/PCNA/PDGFRA/POLD1/PRKACB/PTTG1/SLC25A4/SRF/TGFB3/TGFBR2/TLN1/WNT9A/ZFP36	38
hsa04261	Adrenergic signaling in cardiomyocytes	26/480	144/7430	1.35052e-06	2.82571e-05	2.02305e-05	ACTC1/ADCY5/ADCY9/AGTR1/AKT3/ATP1A2/ATP2B4/BCL2/CACNA1C/CACNA2D1/CACNB2/CACNB4/CAMK2A/CREM/PLCB4/PLN/PPP1R1A/PRKACB/RPS6KA5/RYR2/SCN4B/SCN7A/SLC8A1/TNNT2/TPM1/TPM2	26
hsa04371	Apelin signaling pathway	25/480	137/7430	1.76443e-06	3.42804e-05	2.45429e-05	ACTA2/ADCY5/ADCY9/AGTR1/AKT3/CTGF/EGR1/GABARAPL1/GNG11/GNG7/HDAC4/ITPR1/ITPR3/KLF2/MEF2C/MEF2D/MRAS/MYLK/PLCB4/PRKAA2/PRKACB/PRKAG2/RYR2/RYR3/SLC8A1	25
hsa04924	Renin secretion	16/480	65/7430	2.42491e-06	4.39717e-05	3.14813e-05	ADCY5/ADRB3/AGTR1/AQP1/CACNA1C/CLCA4/EDNRA/ITPR1/ITPR3/KCNMA1/NPR1/PDE1A/PDE1C/PLCB4/PRKACB/PTGER4	16
hsa04114	Oocyte meiosis	23/480	124/7430	3.43546e-06	5.84029e-05	4.18132e-05	ADCY5/ADCY9/AR/AURKA/BUB1/CAMK2A/CCNB1/CCNB2/CCNE1/CDC20/CDK1/CPEB1/CPEB2/CPEB4/ITPR1/ITPR3/MAD2L1/PGR/PKMYT1/PLK1/PRKACB/PTTG1/RPS6KA2	23
hsa04925	Aldosterone synthesis and secretion	19/480	96/7430	9.22522e-06	0.000147604	0.000105676	ADCY5/ADCY9/AGTR1/ATP1A2/ATP2B4/CACNA1C/CACNA1H/CAMK2A/ITPR1/ITPR3/KCNK3/LDLR/NPR1/NR4A1/NR4A2/PDE2A/PLCB4/PRKACB/PRKCB	19
hsa04928	Parathyroid hormone synthesis, secretion and action	20/480	106/7430	1.14483e-05	0.000172997	0.000123856	ADCY5/ADCY9/AKAP13/BCL2/CDKN1A/EGR1/FGFR1/FOS/HBEGF/ITPR1/ITPR3/JUND/MEF2C/MEF2D/NR4A2/PDE4B/PDE4D/PLCB4/PRKACB/PRKCB	20
hsa05205	Proteoglycans in cancer	30/480	201/7430	1.23389e-05	0.000176642	0.000126466	AKT3/ANK2/CAMK2A/CDKN1A/COL21A1/DCN/ESR1/FGF2/FGFR1/FLNA/FLNC/FZD7/HBEGF/HPSE2/HSPG2/ITGA5/ITPR1/ITPR3/MRAS/MYC/PLAU/PPP1R12A/PPP1R12B/PRKACB/PRKCB/PTCH1/SDC2/SHH/THBS1/WNT9A	30
hsa04914	Progesterone-mediated oocyte maturation	19/480	99/7430	1.46862e-05	0.000199732	0.000142997	ADCY5/ADCY9/AKT3/AURKA/BUB1/CCNA2/CCNB1/CCNB2/CDK1/CPEB1/CPEB2/CPEB4/KIF22/MAD2L1/PGR/PKMYT1/PLK1/PRKACB/RPS6KA2	19
hsa04512	ECM-receptor interaction	16/480	82/7430	5.61155e-05	0.000726829	0.000520369	AGRN/COL4A6/HMMR/HSPG2/ITGA1/ITGA5/ITGA7/ITGA8/ITGA9/LAMA2/LAMA4/LAMB2/LAMC3/THBS1/TNXB/VWF	16
hsa04024	cAMP signaling pathway	28/480	198/7430	6.50968e-05	0.000804834	0.000576216	ABCC4/ADCY5/ADCY9/AKT3/ATP1A2/ATP2B4/CACNA1C/CAMK2A/CHRM2/EDNRA/FOS/GRIN2D/HHIP/JUN/MYL9/NFATC1/NPR1/PDE4B/PDE4D/PLN/PPP1R12A/PRKACB/PTCH1/PTGER3/RAC3/RAP1A/RYR2/VIPR2	28
hsa04218	Cellular senescence	24/480	160/7430	8.45206e-05	0.000999548	0.000715621	AKT3/CCNA2/CCNB1/CCNB2/CCND2/CCNE1/CDK1/CDKN1A/E2F1/FOXM1/GADD45B/HIPK3/IL6/ITPR1/ITPR3/MRAS/MYBL2/MYC/NFATC1/NFATC2/NFATC4/SLC25A4/TGFB3/TGFBR2	24
hsa04610	Complement and coagulation cascades	15/480	79/7430	0.000131921	0.00149511	0.00107041	A2M/BDKRB1/BDKRB2/C1R/C1S/C3/C7/CD55/CFD/CFH/CLU/F10/MASP1/PLAU/VWF	15
hsa04927	Cortisol synthesis and secretion	13/480	63/7430	0.000153525	0.00167035	0.00119588	ADCY5/ADCY9/AGTR1/CACNA1C/CACNA1H/ITPR1/ITPR3/KCNK3/LDLR/NR4A1/PBX1/PLCB4/PRKACB	13
hsa05222	Small cell lung cancer	16/480	93/7430	0.000264554	0.00272201	0.00194881	AKT3/BCL2/CCNE1/CDKN1A/CKS1B/CKS2/COL4A6/E2F1/GADD45B/LAMA2/LAMA4/LAMB2/LAMC3/MYC/PTGS2/SKP2	16
hsa04725	Cholinergic synapse	18/480	112/7430	0.0002702	0.00272201	0.00194881	ADCY5/ADCY9/AKT3/BCL2/CACNA1C/CAMK2A/CHRM2/CHRM3/FOS/FYN/GNAO1/GNG11/GNG7/ITPR1/ITPR3/PLCB4/PRKACB/PRKCB	18
hsa04068	FoxO signaling pathway	20/480	132/7430	0.000284041	0.00275926	0.00197548	AKT3/CCNB1/CCNB2/CCND2/CDKN1A/FBXO32/GABARAPL1/GADD45B/IL6/KLF2/PLK1/PRKAA2/PRKAG2/S1PR1/SETD7/SGK1/SKP2/SLC2A4/TGFB3/TGFBR2	20
hsa04360	Axon guidance	24/480	175/7430	0.000343813	0.00322473	0.00230873	ABL1/ABLIM1/BOC/CAMK2A/CFL2/CXCL12/CXCR4/DPYSL2/EPHA3/EPHA7/EPHB2/FYN/ILK/NFATC2/NFATC4/PLXNA1/PTCH1/RAC3/RND1/SEMA3E/SEMA3G/SHH/SLIT2/SLIT3	24
hsa04923	Regulation of lipolysis in adipocytes	11/480	54/7430	0.000550603	0.00499213	0.00357409	ADCY5/ADCY9/ADRB3/AKT3/MGLL/NPR1/PRKACB/PRKG1/PTGER3/PTGS1/PTGS2	11
hsa04810	Regulation of actin cytoskeleton	26/480	208/7430	0.000844575	0.00741046	0.00530548	BDKRB1/BDKRB2/CFL2/CHRM2/CHRM3/FGF10/FGF2/FGF7/FGFR1/GSN/IQGAP3/ITGA1/ITGA5/ITGA7/ITGA8/ITGA9/MRAS/MYL9/MYLK/NCKAP1L/PDGFD/PDGFRA/PPP1R12A/PPP1R12B/RAC3/VCL	26
hsa05161	Hepatitis B	20/480	144/7430	0.000895886	0.00761503	0.00545194	AKT3/BCL2/BIRC5/CCNA2/CCNE1/CDKN1A/E2F1/EGR2/EGR3/FOS/HSPG2/IL6/JUN/MYC/NFATC1/NFATC2/NFATC4/PCNA/PRKCB/TGFB3	20
hsa05144	Malaria	10/480	49/7430	0.000962091	0.00792996	0.00567741	ACKR1/CCL2/CSF3/GYPC/IL6/PECAM1/SDC2/SELP/TGFB3/THBS1	10
hsa04310	Wnt signaling pathway	20/480	146/7430	0.00106744	0.00853954	0.00611383	CAMK2A/CCND2/DAAM2/FOSL1/FZD7/JUN/MYC/NFATC1/NFATC2/NFATC4/PLCB4/PRICKLE2/PRKACB/PRKCB/RAC3/SFRP1/SFRP2/SOX17/TBL1X/WNT9A	20
hsa04972	Pancreatic secretion	15/480	96/7430	0.00115989	0.00901397	0.0064535	ADCY5/ADCY9/ATP1A2/ATP2B4/CHRM3/CLCA4/CPA3/ITPR1/ITPR3/KCNMA1/PLA2G5/PLCB4/PRKCB/RAP1A/RYR2	15
hsa04933	AGE-RAGE signaling pathway in diabetic complications	15/480	99/7430	0.00159709	0.0120669	0.00863925	AGTR1/AKT3/BCL2/CCL2/COL4A6/EGR1/IL6/JUN/NFATC1/PLCB4/PLCD4/PRKCB/TGFB3/TGFBR2/VEGFD	15
hsa03030	DNA replication	8/480	36/7430	0.00173116	0.0125373	0.008976	FEN1/LIG1/MCM2/MCM4/PCNA/POLD1/RFC4/RNASEH2A	8
hsa04970	Salivary secretion	14/480	90/7430	0.00175153	0.0125373	0.008976	ADCY5/ADCY9/ADRB3/ATP1A2/ATP2B4/CHRM3/ITPR1/ITPR3/KCNMA1/PLCB4/PRKACB/PRKCB/PRKG1/RYR3	14
hsa04934	Cushing's syndrome	20/480	154/7430	0.00206396	0.0143948	0.0103059	ADCY5/ADCY9/AGTR1/CACNA1C/CACNA1H/CAMK2A/CCNE1/CDKN1A/E2F1/FZD7/ITPR1/ITPR3/KCNK3/LDLR/NR4A1/PBX1/PLCB4/PRKACB/RAP1A/WNT9A	20
hsa04611	Platelet activation	17/480	123/7430	0.00224589	0.0152721	0.010934	ADCY5/ADCY9/AKT3/FYN/ITPR1/ITPR3/MYLK/P2RX1/PLCB4/PPP1R12A/PRKACB/PRKG1/PTGS1/RAP1A/RASGRP2/TLN1/VWF	17
hsa04911	Insulin secretion	13/480	85/7430	0.0029472	0.0195522	0.0139983	ADCY5/ADCY9/ATP1A2/CACNA1C/CAMK2A/CHRM3/ITPR3/KCNMA1/KCNMB1/PLCB4/PRKACB/PRKCB/RYR2	13
hsa05146	Amoebiasis	14/480	96/7430	0.00325097	0.0210539	0.0150734	ARG2/COL4A6/CTSG/GNAL/IL6/LAMA2/LAMA4/LAMB2/LAMC3/PLCB4/PRKACB/PRKCB/TGFB3/VCL	14
hsa04720	Long-term potentiation	11/480	67/7430	0.0034572	0.0214956	0.0153896	CACNA1C/CAMK2A/GRIN2D/ITPR1/ITPR3/PLCB4/PPP1R1A/PRKACB/PRKCB/RAP1A/RPS6KA2	11
hsa04931	Insulin resistance	15/480	107/7430	0.00347722	0.0214956	0.0153896	ACACB/AKT3/IL6/MLXIP/PPP1R3B/PRKAA2/PRKAG2/PRKCB/PYGB/PYGM/RPS6KA2/SLC2A4/SOCS3/SREBF1/TRIB3	15
hsa04151	PI3K-Akt signaling pathway	36/480	352/7430	0.00379174	0.022919	0.0164087	AKT3/BCL2/CCND2/CCNE1/CDKN1A/CHRM2/COL4A6/CSF3/FGF10/FGF2/FGF7/FGFR1/GHR/GNG11/GNG7/IL6/ITGA1/ITGA5/ITGA7/ITGA8/ITGA9/LAMA2/LAMA4/LAMB2/LAMC3/LPAR1/MYC/NR4A1/PDGFD/PDGFRA/PRKAA2/SGK1/THBS1/TNXB/VEGFD/VWF	36
hsa04260	Cardiac muscle contraction	12/480	78/7430	0.00400877	0.0229266	0.0164142	ACTC1/ATP1A2/CACNA1C/CACNA2D1/CACNB2/CACNB4/COX7A1/RYR2/SLC8A1/TNNT2/TPM1/TPM2	12
hsa04540	Gap junction	13/480	88/7430	0.00401431	0.0229266	0.0164142	ADCY5/ADCY9/CDK1/ITPR1/ITPR3/LPAR1/PDGFD/PDGFRA/PLCB4/PRKACB/PRKCB/PRKG1/TUBA1A	13
hsa05416	Viral myocarditis	10/480	59/7430	0.00411925	0.0229266	0.0164142	ABL1/CD55/DMD/FYN/LAMA2/RAC3/SGCA/SGCB/SGCD/SGCG	10
hsa05167	Kaposi's sarcoma-associated herpesvirus infection	22/480	186/7430	0.00413016	0.0229266	0.0164142	AKT3/C3/CDKN1A/CXCL2/E2F1/FGF2/FOS/GABARAPL1/GNG11/GNG7/IL6/IL6ST/ITPR1/ITPR3/JUN/MYC/NFATC1/NFATC2/NFATC4/PTGS2/RCAN1/ZFP36	22
hsa05032	Morphine addiction	13/480	91/7430	0.0053742	0.0292356	0.0209311	ADCY5/ADCY9/GNAO1/GNG11/GNG7/PDE1A/PDE1C/PDE2A/PDE4B/PDE4D/PDE7B/PRKACB/PRKCB	13
hsa04115	p53 signaling pathway	11/480	72/7430	0.00607962	0.0318011	0.0227678	BCL2/CCNB1/CCNB2/CCND2/CCNE1/CDK1/CDKN1A/GADD45B/GTSE1/RRM2/THBS1	11
hsa05218	Melanoma	11/480	72/7430	0.00607962	0.0318011	0.0227678	AKT3/CDKN1A/E2F1/FGF10/FGF2/FGF7/FGFR1/GADD45B/MITF/PDGFD/PDGFRA	11
hsa04971	Gastric acid secretion	11/480	75/7430	0.00827976	0.0424923	0.0304222	ADCY5/ADCY9/ATP1A2/CAMK2A/CHRM3/ITPR1/ITPR3/MYLK/PLCB4/PRKACB/PRKCB	11
hsa04340	Hedgehog signaling pathway	8/480	47/7430	0.00964423	0.0476951	0.034147	BCL2/BOC/CCND2/CDON/HHIP/PRKACB/PTCH1/SHH	8
hsa04961	Endocrine and other factor-regulated calcium reabsorption	8/480	47/7430	0.00964423	0.0476951	0.034147	ADCY9/ATP1A2/BDKRB2/ESR1/PLCB4/PRKACB/PRKCB/SLC8A1	8

## Sheet: GO-BP
ID	Description	GeneRatio	BgRatio	pvalue	p.adjust	qvalue	geneID	Count
GO:0003012	muscle system process	96/994	402/16992	1.26e-33	6.36e-30	4.61e-30	ACTA2/ACTC1/ACTG2/ACTN2/AKAP13/AKAP6/ANK2/ANXA6/ARG2/ATP1A2/ATP2B4/BDKRB2/CACNA1C/CACNA1H/CACNA2D1/CACNB2/CALD1/CASQ2/CHRM2/CHRM3/CNN1/CRYAB/CTGF/DES/DMD/DMPK/DTNA/DYSF/EDNRA/EDNRB/ERRFI1/EZH2/FLNA/GATA6/GNAO1/GSN/HAND2/HDAC4/HMCN2/HSPB6/IGFBP5/IL6ST/ITGA	96
GO:0006936	muscle contraction	79/994	331/16992	9.16e-28	2.3e-24	1.67e-24	ACTA2/ACTC1/ACTG2/ACTN2/ANK2/ANXA6/ARG2/ATP1A2/BDKRB2/CACNA1C/CACNA1H/CACNA2D1/CACNB2/CALD1/CASQ2/CHRM2/CHRM3/CNN1/CRYAB/CTGF/DES/DMD/DMPK/DTNA/DYSF/EDNRA/EDNRB/FLNA/GNAO1/HDAC4/HMCN2/HSPB6/ITGA1/KCND3/KCNMA1/KLHL41/LMOD1/MYH11/MYH2/MYH3/MYL9/MYLK/MYOCD/M	79
GO:0007517	muscle organ development	74/994	353/16992	2.16e-22	3.62e-19	2.63e-19	ACTC1/ADARB1/AKAP6/ASB2/ATF3/BCL2/BTG2/BVES/CACNA1H/CCNB1/CDK1/CDON/CENPF/CFL2/COL11A1/COL19A1/DCN/DMD/EGR1/EGR2/EGR3/FGF2/FGFR1/FHL1/FOS/FOXP2/FZD7/GATA6/HAND1/HBEGF/HDAC4/HLF/IL6/ITGA7/JPH2/KLHL41/LAMA2/LARGE1/LIF/LMOD3/MAFF/MEF2C/MEF2D/MRAS/MYH3/MYLK/M	74
GO:0044057	regulation of system process	87/994	493/16992	7.75e-21	9.74e-18	7.06e-18	ABCC9/AGTR1/AKAP13/AKAP6/ANK2/ANXA6/AQP1/ATP1A2/ATP2B4/BDKRB2/BVES/CACNA1C/CACNA1H/CACNA2D1/CACNB2/CACNB4/CASQ2/CELF2/CHRM2/CHRM3/CNN1/CTGF/DES/DMD/DMPK/EDNRB/ERRFI1/FBXO32/FGF10/FGFR1/FLNA/FXYD6/GNAO1/GRIN2D/HAND2/HBEGF/HDAC4/HSPB6/HSPB7/IGFBP5/IL6/IL6ST	87
GO:0060537	muscle tissue development	70/994	351/16992	5.88e-20	5.91e-17	4.29e-17	ACTC1/ACTN2/AKAP13/AKAP6/ASB2/ATF3/BCL2/BMP5/BTG2/BVES/CCNB1/CDK1/CDON/CENPF/CFL2/COL11A1/COL19A1/DCN/EGR1/EGR2/FGF2/FGFR1/FOS/FOXP2/FZD7/GATA6/HAND1/HDAC4/HLF/ID2/IGFBP5/ITGA8/JPH2/KLHL41/LMOD3/MAFF/MEF2C/MEF2D/MYH11/MYLK/MYOCD/MYOM1/NEXN/PDGFRA/PITX1/PI	70
GO:0014706	striated muscle tissue development	66/994	337/16992	1.9e-18	1.59e-15	1.15e-15	ACTC1/ACTN2/AKAP13/AKAP6/ASB2/ATF3/BCL2/BMP5/BTG2/BVES/CCNB1/CDK1/CDON/CENPF/CFL2/COL11A1/COL19A1/DCN/EGR1/EGR2/FGF2/FGFR1/FOS/FOXP2/FZD7/GATA6/HAND1/HDAC4/HLF/ID2/JPH2/KLHL41/LMOD3/MAFF/MEF2C/MEF2D/MYH11/MYOCD/MYOM1/NEXN/PDGFRA/PITX1/PITX2/PLN/RYR2/S1PR1	66
GO:0007067	mitotic nuclear division	78/994	453/16992	3.96e-18	2.84e-15	2.06e-15	ABL1/ASPM/AURKA/AURKB/BIRC5/BUB1/BUB1B/CCNA2/CCNB1/CCNB2/CDC20/CDC6/CDCA3/CDCA5/CDCA8/CDK1/CDT1/CENPA/CENPE/CENPF/CIT/DLGAP5/DUSP1/EML1/FBXL7/FLNA/GEM/HELLS/KIF11/KIF14/KIF15/KIF18B/KIF22/KIF23/KIF2C/KIF4A/KIFC1/KLHL13/KNL1/KNTC1/LATS2/MAD2L1/MAPRE2/MKI67	78
GO:0090257	regulation of muscle system process	49/994	205/16992	1.14e-17	7.16e-15	5.19e-15	AKAP13/AKAP6/ANK2/ANXA6/ATP1A2/ATP2B4/CACNA1C/CASQ2/CHRM2/CHRM3/CNN1/CTGF/DMD/DMPK/ERRFI1/FBXO32/FLNA/HAND2/HDAC4/HSPB6/IGFBP5/IL6ST/KLF4/LMCD1/MYL9/MYOCD/NR4A3/P2RX1/PDE4B/PDE4D/PDE5A/PLN/PPP1R12B/PRKG1/PTGS2/RGS2/RYR2/SGCA/SLC8A1/SMAD7/SRF/STC1/TACR2/TA	49
GO:0003013	circulatory system process	80/994	500/16992	1.21e-16	6.77e-14	4.91e-14	ABCC9/ACTA2/ACTC1/ADRB3/AGTR1/AKAP13/ANK2/AR/ATP1A2/ATP2B4/BDKRB1/BDKRB2/BVES/CACNA1C/CACNA1H/CACNA2D1/CACNB2/CACNB4/CASQ2/CD34/CELF2/CHRM2/CHRM3/CMA1/CPA3/CTGF/CTSG/CXCL12/DES/DMD/DMPK/EDNRA/EDNRB/ELN/EPHX2/FLNA/FXYD6/GNAO1/HBEGF/HDAC4/HSPB7/ID2/ITGA1/IT	80
GO:0008015	blood circulation	79/994	496/16992	2.48e-16	1.25e-13	9.03e-14	ABCC9/ACTA2/ACTC1/ADRB3/AGTR1/ANK2/AR/ATP1A2/ATP2B4/BDKRB1/BDKRB2/BVES/CACNA1C/CACNA1H/CACNA2D1/CACNB2/CACNB4/CASQ2/CD34/CELF2/CHRM2/CHRM3/CMA1/CPA3/CTGF/CTSG/CXCL12/DES/DMD/DMPK/EDNRA/EDNRB/ELN/EPHX2/FLNA/FXYD6/GNAO1/HBEGF/HDAC4/HSPB7/ID2/ITGA1/ITPR1/ITP	79
GO:0030198	extracellular matrix organization	60/994	315/16992	2.77e-16	1.27e-13	9.18e-14	A2M/ABI3BP/ABL1/ADAM8/ADAMTS4/AGRN/CCDC80/CMA1/COL10A1/COL11A1/COL14A1/COL19A1/COL4A6/COL7A1/CRISPLD2/CSGALNACT1/CTGF/CTSG/CYR61/DCN/DDR2/DPT/ELN/FBLN5/FBN1/FGF2/FOXF1/FSCN1/HPSE2/HSPG2/ITGA1/ITGA5/ITGA7/ITGA8/ITGA9/JAM2/JAM3/LAMA2/LAMA4/LAMB2/LAMC3/MFAP2	60
GO:0043062	extracellular structure organization	60/994	316/16992	3.23e-16	1.35e-13	9.82e-14	A2M/ABI3BP/ABL1/ADAM8/ADAMTS4/AGRN/CCDC80/CMA1/COL10A1/COL11A1/COL14A1/COL19A1/COL4A6/COL7A1/CRISPLD2/CSGALNACT1/CTGF/CTSG/CYR61/DCN/DDR2/DPT/ELN/FBLN5/FBN1/FGF2/FOXF1/FSCN1/HPSE2/HSPG2/ITGA1/ITGA5/ITGA7/ITGA8/ITGA9/JAM2/JAM3/LAMA2/LAMA4/LAMB2/LAMC3/MFAP2	60
GO:0048514	blood vessel morphogenesis	78/994	492/16992	5.05e-16	1.95e-13	1.42e-13	ADAM8/ADGRA2/ADGRB3/APOLD1/AQP1/C3/CCL2/CD34/CLIC4/CMA1/CSPG4/CTGF/CYR61/DCN/EDNRA/EGR3/EPHB2/ESM1/FGF10/FGF2/FGFR1/FOXF1/GATA6/HAND1/HAND2/HIF3A/HSPB6/HSPG2/IL6/ITGA5/JAM3/JUN/JUNB/KLF4/LEPR/MCAM/MEIS1/MYLK/MYOCD/NDNF/NFATC4/NPR1/NR4A1/NRP2/PARVA/PDGFRA/	78
GO:0042692	muscle cell differentiation	64/994	362/16992	1.22e-15	4.37e-13	3.17e-13	ABL1/ACTC1/ACTN2/ADGRB3/AKAP13/AKAP6/ANK2/ASB2/BCL2/BIN1/BOC/BVES/CACNA1H/CASQ2/CCNB1/CDK1/CDON/CFL2/DMD/DMPK/EDNRB/EHD2/EZH2/FGF10/FLNC/FOXF1/FZD7/GATA6/HDAC4/IGFBP5/ILK/ITGA8/KLHL41/LMOD3/MEF2C/MYH11/MYH3/MYOCD/MYOM1/NEXN/NFATC2/NFATC4/PDGFRA/PITX1/PITX	64
GO:0001525	angiogenesis	67/994	411/16992	1.61e-14	5.41e-12	3.92e-12	ADAM8/ADGRA2/ADGRB3/APOLD1/AQP1/C3/CCL2/CD34/CLIC4/CMA1/CSPG4/CTGF/CYR61/DCN/EDNRA/EGR3/EPHB2/ESM1/FGF10/FGF2/FGFR1/GATA6/HAND1/HAND2/HIF3A/HSPB6/HSPG2/IL6/ITGA5/JAM3/JUN/KLF4/LEPR/MCAM/MEIS1/NDNF/NFATC4/NPR1/NR4A1/NRP2/PARVA/PDGFRA/PITX2/PRKCB/PTGIS/PTGS	67
GO:0000819	sister chromatid segregation	46/994	218/16992	1.76e-14	5.53e-12	4.01e-12	AURKB/BIRC5/BUB1/BUB1B/CCNB1/CDC20/CDC6/CDCA5/CDCA8/CDT1/CENPA/CENPE/CENPF/CENPU/DLGAP5/DUSP1/FEN1/KIF14/KIF18B/KIF22/KIF23/KIF2C/KIF4A/KIFC1/KNL1/KNTC1/MAD2L1/NCAPD2/NCAPG/NCAPH/NDC80/NEK2/NUF2/NUSAP1/PLK1/PRC1/RACGAP1/RCC2/SKA1/SPAG5/SPC24/TACC3/TOP2A/T	46
GO:0000070	mitotic sister chromatid segregation	35/994	134/16992	3.06e-14	9.04e-12	6.55e-12	AURKB/BUB1/BUB1B/CCNB1/CDC20/CDC6/CDCA5/CDCA8/CDT1/CENPE/CENPF/DLGAP5/DUSP1/KIF14/KIF18B/KIF22/KIF23/KIF2C/KIF4A/KIFC1/MAD2L1/NCAPD2/NCAPG/NCAPH/NDC80/NEK2/NUSAP1/PLK1/PRC1/RACGAP1/SPAG5/TACC3/TTK/UBE2C/ZWINT	35
GO:0007059	chromosome segregation	58/994	330/16992	3.58e-14	1e-11	7.25e-12	AURKB/BIRC5/BUB1/BUB1B/CCNB1/CCNE1/CDC20/CDC6/CDCA5/CDCA8/CDT1/CENPA/CENPE/CENPF/CENPU/DLGAP5/DUSP1/ECT2/FANCD2/FEN1/GEM/HJURP/KIF11/KIF14/KIF18B/KIF22/KIF23/KIF2C/KIF4A/KIFC1/KNL1/KNTC1/MAD2L1/MKI67/NCAPD2/NCAPG/NCAPH/NDC80/NEK2/NUF2/NUSAP1/P3H4/PLK1/PRC	58
GO:0098813	nuclear chromosome segregation	53/994	287/16992	5.9e-14	1.56e-11	1.13e-11	AURKB/BIRC5/BUB1/BUB1B/CCNB1/CCNE1/CDC20/CDC6/CDCA5/CDCA8/CDT1/CENPA/CENPE/CENPF/CENPU/DLGAP5/DUSP1/ECT2/FANCD2/FEN1/GEM/KIF14/KIF18B/KIF22/KIF23/KIF2C/KIF4A/KIFC1/KNL1/KNTC1/MAD2L1/NCAPD2/NCAPG/NCAPH/NDC80/NEK2/NUF2/NUSAP1/P3H4/PLK1/PRC1/PTTG1/RACGAP1/RC	53
GO:0007507	heart development	74/994	499/16992	1.03e-13	2.58e-11	1.87e-11	ACACB/ACTC1/ACTN2/ADAMTS1/AKAP13/AKAP6/ANK2/BMP5/BVES/CACNA1C/CC2D2A/CCNB1/CDK1/CLDN5/COL11A1/CYR61/DCHS1/DLC1/EDNRA/FAT4/FBN1/FGF2/FGFR1/FOXF1/FZD7/GATA6/HAND1/HAND2/ID2/ILK/JPH2/JUN/MEF2C/MEF2D/MYH11/MYOCD/NEXN/NFATC4/NTRK3/OLFM1/PAM/PARVA/PCNA/PDGFRA/P	74
GO:1903522	regulation of blood circulation	51/994	273/16992	1.11e-13	2.65e-11	1.92e-11	ABCC9/AGTR1/ANK2/ATP1A2/ATP2B4/BDKRB2/BVES/CACNA1C/CACNA1H/CACNA2D1/CACNB2/CACNB4/CASQ2/CELF2/CHRM2/CHRM3/CTGF/DES/DMD/DMPK/FLNA/FXYD6/GNAO1/HBEGF/HDAC4/HSPB7/ITPR1/ITPR3/KCND3/KCNK3/NPR1/P2RX1/PDE4B/PDE4D/PDE5A/PER2/PLN/POPDC2/PTGS2/RGS2/RYR2/RYR3/SCN4B/	51
GO:0033002	muscle cell proliferation	38/994	166/16992	2.31e-13	5.28e-11	3.83e-11	ABCC4/CCNB1/CDK1/CNN1/FGF2/FGFR1/GATA6/HBEGF/HDAC4/ID2/IGFBP5/IL6/ILK/JUN/KLF4/MEF2C/MYOCD/NPR1/NR4A3/OGN/PDE1A/PDGFD/PTGS2/RBPMS2/S1PR1/SHH/SKP2/TBX20/TBX5/TGFB3/TGFBR2/TGFBR3/THBS1/TNFAIP3/TPM1/TRIB1/VIPR2/ZFPM2	38
GO:0003015	heart process	49/994	262/16992	3.25e-13	7.1e-11	5.14e-11	ABCC9/ACTC1/AKAP13/ANK2/ATP1A2/ATP2B4/BVES/CACNA1C/CACNA1H/CACNA2D1/CACNB2/CACNB4/CASQ2/CELF2/CHRM2/CTGF/DES/DMD/DMPK/FLNA/FXYD6/GNAO1/HBEGF/HDAC4/HSPB7/ITPR1/ITPR3/KCND3/KCNK3/NPR1/PDE4B/PDE4D/PDE5A/PLN/POPDC2/RGS2/RYR2/RYR3/SCN4B/SGCD/SGCG/SLC8A1/SMAD7/	49
GO:0048738	cardiac muscle tissue development	40/994	186/16992	4.76e-13	9.98e-11	7.24e-11	ACTC1/ACTN2/AKAP13/AKAP6/BMP5/BVES/CCNB1/CDK1/COL11A1/FGF2/FGFR1/FZD7/GATA6/HAND1/ID2/JPH2/MEF2C/MYH11/MYOCD/NEXN/PDGFRA/PITX2/PLN/RYR2/S1PR1/SGCB/SGCD/SGCG/SIK1/SLC8A1/SMAD7/SORBS2/SRF/TBX20/TBX5/TGFBR2/TGFBR3/TNNT2/TPM1/ZFPM2	40
GO:0008016	regulation of heart contraction	45/994	229/16992	4.98e-13	1e-10	7.26e-11	ABCC9/ANK2/ATP1A2/ATP2B4/BVES/CACNA1C/CACNA1H/CACNA2D1/CACNB2/CACNB4/CASQ2/CELF2/CHRM2/CTGF/DES/DMD/DMPK/FLNA/FXYD6/GNAO1/HBEGF/HDAC4/HSPB7/ITPR1/ITPR3/KCND3/KCNK3/NPR1/PDE4B/PDE4D/PDE5A/PLN/POPDC2/RGS2/RYR2/RYR3/SCN4B/SLC8A1/SMAD7/SREBF1/STC1/TACR3/THRA/	45
GO:0006937	regulation of muscle contraction	35/994	148/16992	7.42e-13	1.44e-10	1.04e-10	ANK2/ANXA6/ATP1A2/CACNA1C/CASQ2/CHRM2/CHRM3/CNN1/CTGF/DMD/DMPK/FLNA/HDAC4/HSPB6/MYL9/MYOCD/P2RX1/PDE4B/PDE4D/PDE5A/PLN/PPP1R12B/PRKG1/PTGS2/RGS2/RYR2/SLC8A1/SMAD7/SRF/STC1/TACR2/TACR3/TNNT1/TNNT2/TPM1	35
GO:0060047	heart contraction	48/994	259/16992	8.06e-13	1.5e-10	1.09e-10	ABCC9/ACTC1/ANK2/ATP1A2/ATP2B4/BVES/CACNA1C/CACNA1H/CACNA2D1/CACNB2/CACNB4/CASQ2/CELF2/CHRM2/CTGF/DES/DMD/DMPK/FLNA/FXYD6/GNAO1/HBEGF/HDAC4/HSPB7/ITPR1/ITPR3/KCND3/KCNK3/NPR1/PDE4B/PDE4D/PDE5A/PLN/POPDC2/RGS2/RYR2/RYR3/SCN4B/SGCD/SGCG/SLC8A1/SMAD7/SREBF1/	48
GO:0035239	tube morphogenesis	56/994	346/16992	3.31e-12	5.95e-10	4.31e-10	ABL1/AR/BCL2/BMP5/CC2D2A/CLIC4/DCHS1/DLC1/EDNRA/EPHA7/ESR1/ETV4/FAT4/FGF10/FGF2/FOXF1/GATA6/HAND1/HAND2/HHIP/ID2/ILK/KIF26B/MEF2C/MTHFD1L/MYC/NFATC4/NFIB/NR4A3/PBX1/PDGFRA/PITX2/PKD1/PRKACB/PTCH1/RBPMS2/RHOB/RYR2/SEMA3E/SFRP1/SFRP2/SHH/SHROOM3/SLIT2/SOX17	56
GO:0051983	regulation of chromosome segregation	25/994	83/16992	4.65e-12	8.06e-10	5.84e-10	AURKB/BUB1/BUB1B/CCNB1/CDC6/CDCA5/CDT1/CENPE/CENPF/DLGAP5/DUSP1/ECT2/FEN1/KIF2C/MAD2L1/MKI67/NDC80/NEK2/PLK1/RACGAP1/RCC2/SPAG5/TACC3/TTK/UBE2C	25
GO:0051146	striated muscle cell differentiation	44/994	242/16992	1.43e-11	2.39e-09	1.73e-09	ACTC1/ACTN2/ADGRB3/AKAP13/AKAP6/BCL2/BVES/CACNA1H/CASQ2/CCNB1/CDK1/CDON/CFL2/DMD/DMPK/EHD2/EZH2/FLNC/FZD7/GATA6/HDAC4/IGFBP5/KLHL41/LMOD3/MEF2C/MYH11/MYH3/MYOCD/MYOM1/NEXN/NFATC2/PDGFRA/PITX2/PLEKHO1/SGCB/SHH/SIK1/SLC8A1/SORBS2/SRF/TBX5/THRA/TMOD1/TPM1	44
GO:0072001	renal system development	48/994	280/16992	1.5e-11	2.44e-09	1.77e-09	ACTA2/ADAMTS1/AGTR1/ARG2/BCL2/CD34/CENPF/DCHS1/DCN/EGR1/EPCAM/EPHA7/FAT4/FBN1/FGF10/FGF2/FGFR1/FOXF1/ID2/ILK/ITGA8/KIF26B/LAMB2/LIF/LRRK2/MEF2C/MYC/MYOCD/NFIA/ODC1/PBX1/PDGFD/PDGFRA/PECAM1/PKD1/PTCH1/SFRP1/SHH/SLIT2/SMAD7/SOX17/SOX4/SPRY1/TCF21/TIPARP/TNS	48
GO:0060485	mesenchyme development	43/994	238/16992	3.02e-11	4.56e-09	3.31e-09	ACTA2/ACTC1/ACTG2/BCL2/BMP5/BNC2/CORO1C/DACT3/DCHS1/EDNRA/EDNRB/EPHA3/EZH2/FGF10/FGFR1/FOXF1/GLIPR2/HAND1/HAND2/MEF2C/MEOX1/MYC/OLFM1/PHLDB2/PITX2/RANBP3L/RGCC/SFRP1/SFRP2/SHH/SMAD7/SPRY1/TBX20/TBX5/TCF21/TGFB1I1/TGFB3/TGFBR2/TGFBR3/TMEM100/WWTR1/ZEB2/ZFP	43
GO:0031589	cell-substrate adhesion	50/994	305/16992	3.04e-11	4.56e-09	3.31e-09	ABI3BP/ABL1/ACTN2/ARHGAP6/BCL2/BVES/CCDC80/CD34/CORO1C/CTGF/CYR61/DLC1/EMILIN1/EPHA3/FBLN2/FBLN5/FERMT2/FLNA/FOXF1/FZD7/ILK/ITGA1/ITGA5/ITGA7/ITGA8/JAM3/KANK1/KIF14/MYADM/MYOC/NDNF/PARVA/PHLDB2/PKD1/PLAU/RAC3/RCC2/SEMA3E/SFRP1/SGCE/SMOC2/SNED1/SORBS1/SRF/	50
GO:0001655	urogenital system development	51/994	315/16992	3.08e-11	4.56e-09	3.31e-09	ACTA2/ADAMTS1/AGTR1/AR/ARG2/BCL2/CD34/CENPF/DCHS1/DCN/EGR1/EPCAM/EPHA7/EPHB2/ESR1/FAT4/FBN1/FGF10/FGF2/FGFR1/FOXF1/ID2/ILK/ITGA8/KIF26B/LAMB2/LIF/LRRK2/MEF2C/MYC/MYOCD/NFIA/ODC1/PBX1/PDGFD/PDGFRA/PECAM1/PKD1/PTCH1/SFRP1/SHH/SLIT2/SMAD7/SOX17/SOX4/SPRY1/TC	51
GO:0055001	muscle cell development	33/994	151/16992	3.34e-11	4.8e-09	3.48e-09	ACTC1/ACTN2/AKAP13/AKAP6/ANK2/BCL2/BVES/CASQ2/CCNB1/CDK1/CFL2/DMD/FLNC/HDAC4/KLHL41/LMOD3/MEF2C/MYH11/MYH3/MYOM1/NEXN/NFATC2/NFATC4/PDGFRA/PITX2/SGCB/SGCD/SGCG/SLC8A1/SORBS2/SRF/TMOD1/TPM1	33
GO:0032970	regulation of actin filament-based process	52/994	329/16992	4.94e-11	6.9e-09	5e-09	ABL1/ACTN2/AKAP13/ANK2/ARHGAP6/ATP1A2/CACNA1C/CDC42EP3/CFL2/CIT/CSF3/CTGF/CXCL12/DIXDC1/DLC1/DSTN/EPHA3/FLNA/FSCN1/GSN/ILK/JAM3/KANK1/LMOD1/LMOD3/LPAR1/MEF2C/MYADM/MYOC/NCKAP1L/NTRK3/PAM/PDE4B/PDE4D/PDGFRA/PHLDB2/PLN/PTGER4/RGCC/RYR2/S1PR1/SEMA3E/SFRP1/SL	52
GO:0044843	cell cycle G1/S phase transition	44/994	254/16992	7.5e-11	1.02e-08	7.39e-09	ATP2B4/AURKA/BCL2/BTG2/C8orf4/CAMK2A/CCNA2/CCNB1/CCND2/CCNE1/CDC45/CDC6/CDK1/CDKN1A/CDT1/DCUN1D3/E2F1/EZH2/FGF10/FHL1/GTSE1/ID2/INHBA/IQGAP3/KANK2/KIF14/LATS2/MCM10/MCM2/MCM4/MYC/NACC2/ORC6/PCNA/PID1/PKD1/RANBP3L/RCC1/RGCC/RRM2/SKP2/SOX4/TYMS/WEE1	44
GO:0001763	morphogenesis of a branching structure	37/994	193/16992	1.25e-10	1.66e-08	1.2e-08	AR/BCL2/CLIC4/DCHS1/EDNRA/EPHA7/ESR1/ETV4/FAT4/FGF10/FGF2/FGF7/FGFR1/FOXF1/HHIP/IL6/ILK/LRRK2/MYC/NFATC4/PBX1/PITX2/PKD1/PLXNA1/PTCH1/SEMA3E/SFRP1/SFRP2/SHH/SLIT2/SOCS3/SPRY1/SRF/TBX20/TCF21/TGFBR2/TIMELESS	37
GO:0060562	epithelial tube morphogenesis	49/994	309/16992	1.6e-10	2.06e-08	1.49e-08	ABL1/AR/BCL2/BMP5/CC2D2A/CLIC4/DCHS1/DLC1/EDNRA/EPHA7/ESR1/ETV4/FAT4/FGF10/FGF2/FOXF1/HAND1/HAND2/HHIP/ILK/KIF26B/MEF2C/MTHFD1L/MYC/NFATC4/PBX1/PITX2/PKD1/PRKACB/PTCH1/RHOB/RYR2/SEMA3E/SFRP1/SFRP2/SHH/SHROOM3/SLIT2/SOX17/SOX4/SPRY1/SRF/STARD13/STIL/TBX20/	49
GO:0051493	regulation of cytoskeleton organization	60/994	426/16992	2.01e-10	2.53e-08	1.83e-08	ABL1/ACTN2/AKAP13/ARHGAP6/AURKA/C16orf45/CDC42EP3/CFL2/CIT/CLIC4/CLIP3/CSF3/CTGF/CXCL12/DIXDC1/DLC1/DSTN/EPHA3/FSCN1/GSN/ILK/JAM3/KANK1/KIF11/LMOD1/LMOD3/LPAR1/MAPT/MEF2C/MYADM/MYOC/NCKAP1L/NEK2/NES/NEXN/NTRK3/PAM/PDGFRA/PHLDB2/PKD1/PLK1/PTGER4/RANBP3L/RG	60
GO:0048660	regulation of smooth muscle cell proliferation	27/994	113/16992	2.43e-10	2.98e-08	2.16e-08	ABCC4/CNN1/HBEGF/HDAC4/ID2/IGFBP5/IL6/ILK/JUN/KLF4/MYOCD/NPR1/NR4A3/OGN/PDE1A/PDGFD/PTGS2/RBPMS2/S1PR1/SKP2/TGFB3/TGFBR2/THBS1/TNFAIP3/TPM1/TRIB1/VIPR2	27
GO:0061138	morphogenesis of a branching epithelium	35/994	180/16992	2.65e-10	3.1e-08	2.25e-08	AR/BCL2/CLIC4/DCHS1/EDNRA/ESR1/ETV4/FAT4/FGF10/FGF2/FGF7/FGFR1/FOXF1/HHIP/IL6/ILK/MYC/NFATC4/PBX1/PITX2/PKD1/PLXNA1/PTCH1/SEMA3E/SFRP1/SFRP2/SHH/SLIT2/SOCS3/SPRY1/SRF/TBX20/TCF21/TGFBR2/TIMELESS	35
GO:0007052	mitotic spindle organization	24/994	91/16992	2.71e-10	3.1e-08	2.25e-08	AURKA/AURKB/BIRC5/CCNB1/CDC20/EML1/FLNA/KIF11/KIF23/KIF4A/KIFC1/MYBL2/NDC80/NEK2/PKD1/PLK1/PRC1/RACGAP1/RCC1/STIL/STMN1/TACC3/TPX2/TTK	24
GO:1902850	microtubule cytoskeleton organization involved in mitosis	24/994	91/16992	2.71e-10	3.1e-08	2.25e-08	AURKA/AURKB/BIRC5/CCNB1/CDC20/EML1/FLNA/KIF11/KIF23/KIF4A/KIFC1/MYBL2/NDC80/NEK2/PKD1/PLK1/PRC1/RACGAP1/RCC1/STIL/STMN1/TACC3/TPX2/TTK	24
GO:0042493	response to drug	58/994	408/16992	2.82e-10	3.15e-08	2.29e-08	ABCA8/ABCC4/ABCC9/ACACB/ACTC1/AQP1/BCHE/BCL2/CA9/CCL2/CCNB1/CDH3/CDK1/CDKN1A/CENPF/DNMT3B/FOS/FOSB/FOSL1/FYN/GATA6/GNAO1/HDAC4/IL6/INHBA/JUN/JUNB/JUND/KCNK3/LRP8/MAOB/MDK/MEF2C/MYC/NCKAP1L/NFATC2/PAM/PDE2A/PDE4B/PPP1R12A/PPP1R14A/PRKAA2/PRKAR2B/PTCH1/PTGS	58
GO:0030324	lung development	34/994	172/16992	3.01e-10	3.29e-08	2.38e-08	AARD/CRISPLD2/CTGF/DHCR7/ERRFI1/FGF10/FGF7/FGFR1/FOXF1/FOXP2/GATA6/HHIP/IGFBP5/KLF2/LIF/MYOCD/NFIB/PITX2/PKD1/PKDCC/SHH/SIM2/SPRY1/SREBF1/SRF/STK40/TBX4/TBX5/TCF21/TGFB3/TGFBR2/THRA/TIMELESS/ZFPM2	34
GO:0001822	kidney development	44/994	265/16992	3.09e-10	3.31e-08	2.4e-08	ACTA2/ADAMTS1/AGTR1/ARG2/BCL2/CD34/CENPF/DCHS1/DCN/EGR1/EPCAM/EPHA7/FAT4/FBN1/FGF10/FGF2/FGFR1/ID2/ILK/ITGA8/KIF26B/LAMB2/LIF/LRRK2/MEF2C/MYC/ODC1/PBX1/PDGFD/PDGFRA/PECAM1/PKD1/PTCH1/SFRP1/SHH/SLIT2/SMAD7/SOX4/SPRY1/TCF21/TIPARP/TNS2/WWTR1/ZBTB16	44
GO:0048659	smooth muscle cell proliferation	27/994	116/16992	4.58e-10	4.79e-08	3.48e-08	ABCC4/CNN1/HBEGF/HDAC4/ID2/IGFBP5/IL6/ILK/JUN/KLF4/MYOCD/NPR1/NR4A3/OGN/PDE1A/PDGFD/PTGS2/RBPMS2/S1PR1/SKP2/TGFB3/TGFBR2/THBS1/TNFAIP3/TPM1/TRIB1/VIPR2	27
GO:0030323	respiratory tube development	34/994	176/16992	5.71e-10	5.86e-08	4.25e-08	AARD/CRISPLD2/CTGF/DHCR7/ERRFI1/FGF10/FGF7/FGFR1/FOXF1/FOXP2/GATA6/HHIP/IGFBP5/KLF2/LIF/MYOCD/NFIB/PITX2/PKD1/PKDCC/SHH/SIM2/SPRY1/SREBF1/SRF/STK40/TBX4/TBX5/TCF21/TGFB3/TGFBR2/THRA/TIMELESS/ZFPM2	34
GO:0000082	G1/S transition of mitotic cell cycle	41/994	241/16992	5.88e-10	5.88e-08	4.26e-08	AURKA/BCL2/BTG2/CAMK2A/CCNB1/CCND2/CCNE1/CDC45/CDC6/CDK1/CDKN1A/CDT1/DCUN1D3/E2F1/EZH2/FGF10/FHL1/GTSE1/ID2/INHBA/IQGAP3/KANK2/KIF14/LATS2/MCM10/MCM2/MCM4/MYC/NACC2/ORC6/PCNA/PID1/PKD1/RANBP3L/RCC1/RGCC/RRM2/SKP2/SOX4/TYMS/WEE1	41
GO:0016049	cell growth	64/994	482/16992	5.96e-10	5.88e-08	4.26e-08	ABL1/AGTR1/AKAP6/APBB1/AR/AURKA/BCL2/BDKRB1/CDKN1A/CPNE6/CRYAB/CTGF/CXCL12/CYR61/DACT3/DCLK1/DCUN1D3/DPYSL2/EMP1/EPHA7/ESM1/FAM107A/FBLN5/FHL1/HBEGF/IGFBP5/IL6/ILK/INHBA/KIF14/LAMB2/LTBP4/MAP1B/MAPT/MYOCD/NDN/NDNF/NPR1/NRP2/NTRK3/OLFM1/OSTN/PLXNA1/RASGRP2	64
GO:0055002	striated muscle cell development	29/994	136/16992	9.56e-10	9.25e-08	6.7e-08	ACTC1/ACTN2/AKAP13/AKAP6/BCL2/BVES/CASQ2/CCNB1/CDK1/CFL2/DMD/FLNC/HDAC4/KLHL41/LMOD3/MEF2C/MYH11/MYH3/MYOM1/NEXN/NFATC2/PDGFRA/PITX2/SGCB/SLC8A1/SORBS2/SRF/TMOD1/TPM1	29
GO:0070252	actin-mediated cell contraction	25/994	104/16992	9.77e-10	9.27e-08	6.72e-08	ACTC1/ACTN2/ANK2/ATP1A2/CACNA1C/CACNA2D1/CACNB2/DES/DMD/FLNA/KCND3/MYH2/MYH3/PARVA/PDE4B/PDE4D/PLN/RYR2/SCN4B/STC1/TMOD1/TNNT1/TNNT2/TPM1/TPM2	25
GO:0006939	smooth muscle contraction	24/994	97/16992	1.12e-09	1.05e-07	7.59e-08	ACTA2/ATP1A2/BDKRB2/CHRM2/CHRM3/CNN1/EDNRA/EDNRB/HMCN2/KCNMA1/MYH11/MYLK/MYOCD/P2RX1/PDE4D/PRKG1/PTGER3/PTGS2/RGS2/SLC8A1/SMTN/SRF/TACR2/TACR3	24
GO:0006941	striated muscle contraction	32/994	165/16992	1.65e-09	1.48e-07	1.07e-07	ACTC1/ANK2/ARG2/ATP1A2/CACNA1C/CACNA2D1/CACNB2/CASQ2/CTGF/DMD/DMPK/DTNA/FLNA/HDAC4/KCND3/KLHL41/MYH3/MYOM1/PDE4B/PDE4D/PDE5A/PLN/RGS2/RYR2/SCN4B/SLC8A1/SMAD7/STC1/SYNM/TNNT1/TNNT2/TPM1	32
GO:0031032	actomyosin structure organization	32/994	165/16992	1.65e-09	1.48e-07	1.07e-07	ACTC1/ACTN2/AKAP13/ARHGAP6/CASQ2/CDC42BPA/CFL2/CNN1/CTGF/DLC1/EPB41L2/KIF23/KLHL41/LPAR1/MEF2C/MYH11/MYH3/MYOC/MYOM1/PDGFRA/PHLDB2/PTGER4/RACGAP1/RGCC/S1PR1/SFRP1/SORBS1/SRF/STMN1/TGFB3/TMOD1/TPM1	32
GO:0003007	heart morphogenesis	39/994	230/16992	1.7e-09	1.5e-07	1.09e-07	ACTC1/ADAMTS1/BMP5/CLDN5/COL11A1/CYR61/DCHS1/DLC1/FAT4/FOXF1/GATA6/HAND1/HAND2/ID2/ILK/JUN/MEF2C/OLFM1/PARVA/PITX2/PTCH1/RYR2/S1PR1/SFRP2/SHH/SMAD7/SOX17/SOX4/SPRY1/SRF/STIL/TBX20/TBX5/TGFBR2/TGFBR3/TMEM100/TNNT2/TPM1/ZFPM2	39
GO:0030336	negative regulation of cell migration	37/994	214/16992	2.56e-09	2.22e-07	1.61e-07	ADARB1/BCL2/BMP5/C16orf45/CCL2/CLIC4/CORO1C/CXCL12/CYGB/DCN/DLC1/DPYSL3/FGF2/IGFBP5/ILK/KANK1/KLF4/MYOCD/PHLDB2/PODN/PTGER4/RECK/RGCC/RHOB/SFRP1/SFRP2/SHH/SLIT2/SMAD7/SRF/STARD13/STC1/TBX5/THBS1/TPM1/TRIB1/VCL	37
GO:0060538	skeletal muscle organ development	31/994	161/16992	3.55e-09	3.03e-07	2.2e-07	ASB2/ATF3/BCL2/BTG2/BVES/CDON/CFL2/COL19A1/DCN/DMD/EGR1/EGR2/FOS/FOXP2/HDAC4/HLF/KLHL41/LARGE1/LMOD3/MAFF/MEF2C/MEF2D/MYOCD/MYOM1/PITX1/PITX2/SHH/SOX17/SVIL/TCF21/TSC22D3	31
GO:0001503	ossification	52/994	373/16992	4.75e-09	3.98e-07	2.88e-07	BCL2/BMP5/CHRDL1/CLEC3B/COL10A1/COL11A1/CSGALNACT1/CTGF/CYR61/DCHS1/DDR2/EGR2/FASN/FAT4/HAND2/HDAC4/ID2/IGFBP5/IGSF10/IL6/IL6ST/ILK/JUNB/JUND/KLF10/MEF2C/MEF2D/MGP/MYOC/OMD/OSTN/PBX1/PDLIM7/PKDCC/PTCH1/PTGER4/PTGS2/RANBP3L/ROR2/S1PR1/SFRP1/SFRP2/SHH/SLC8A	52
GO:0070482	response to oxygen levels	50/994	355/16992	6.67e-09	5.5e-07	3.99e-07	ADAM8/APOLD1/AQP1/BCL2/CA9/CCL2/CCNA2/CCNB1/CD34/CDKN1A/CPEB1/CPEB2/CPEB4/CTGF/CXCL12/CXCR4/CYGB/DNMT3B/E2F1/EDNRA/EGR1/GATA6/HIF3A/ITPR1/KCNK3/KCNMA1/KCNMB1/LPAR1/MYC/MYOCD/NDNF/NR4A2/PAM/PLAU/PRKCB/PTGIS/PTGS2/RGCC/RYR2/SFRP1/SLC2A4/SLC8A1/SOD3/SRF/STC1	50
GO:0014897	striated muscle hypertrophy	19/994	68/16992	6.9e-09	5.6e-07	4.06e-07	AKAP13/AKAP6/ATP2B4/ERRFI1/EZH2/GATA6/HAND2/HDAC4/IGFBP5/IL6ST/LMCD1/MEF2C/MYOC/NR4A3/PDE5A/RGS2/RYR2/SORBS2/TRIM63	19
GO:0048754	branching morphogenesis of an epithelial tube	29/994	148/16992	7.47e-09	5.96e-07	4.32e-07	AR/BCL2/CLIC4/DCHS1/EDNRA/ESR1/ETV4/FAT4/FGF10/FGF2/FOXF1/HHIP/ILK/MYC/NFATC4/PBX1/PITX2/PKD1/PTCH1/SEMA3E/SFRP2/SHH/SLIT2/SPRY1/SRF/TBX20/TCF21/TGFBR2/TIMELESS	29
GO:0014896	muscle hypertrophy	19/994	70/16992	1.17e-08	9.02e-07	6.54e-07	AKAP13/AKAP6/ATP2B4/ERRFI1/EZH2/GATA6/HAND2/HDAC4/IGFBP5/IL6ST/LMCD1/MEF2C/MYOC/NR4A3/PDE5A/RGS2/RYR2/SORBS2/TRIM63	19
GO:0048545	response to steroid hormone	52/994	383/16992	1.18e-08	9.02e-07	6.54e-07	AKAP13/AQP1/AR/ATP1A2/BCHE/BCL2/CALCOCO1/CCL2/CCNE1/CDKN1A/CRY2/CTGF/DNMT3B/DUSP1/ERRFI1/ESR1/FBXO32/FOS/FOSB/FOSL1/IL6/KANK2/KLF9/LMO3/MAOB/MDK/NR2F1/NR3C2/NR4A1/NR4A2/NR4A3/NTRK3/PAM/PCNA/PER1/PGR/PTGS2/SFRP1/SKP2/SLIT2/SLIT3/SREBF1/STC1/TCF21/TGFB1I1/T	52
GO:0060541	respiratory system development	34/994	197/16992	1.18e-08	9.02e-07	6.54e-07	AARD/CRISPLD2/CTGF/DHCR7/ERRFI1/FGF10/FGF7/FGFR1/FOXF1/FOXP2/GATA6/HHIP/IGFBP5/KLF2/LIF/MYOCD/NFIB/PITX2/PKD1/PKDCC/SHH/SIM2/SPRY1/SREBF1/SRF/STK40/TBX4/TBX5/TCF21/TGFB3/TGFBR2/THRA/TIMELESS/ZFPM2	34
GO:0019722	calcium-mediated signaling	29/994	151/16992	1.2e-08	9.02e-07	6.54e-07	AGTR1/AKAP6/ANK2/ATP1A2/ATP2B4/CACNA1C/CASQ2/CXCR4/DMD/DMPK/HDAC4/ITPR1/JPH2/LMCD1/LRRK2/MAPT/NCALD/NFATC1/NFATC2/NFATC4/PDE4D/PLN/PTGFR/RCAN1/RCAN2/RYR2/SELP/SLC8A1/TMEM100	29
GO:0036293	response to decreased oxygen levels	48/994	340/16992	1.24e-08	9.18e-07	6.66e-07	ADAM8/APOLD1/AQP1/BCL2/CA9/CCL2/CCNA2/CCNB1/CD34/CPEB1/CPEB2/CPEB4/CTGF/CXCL12/CXCR4/CYGB/DNMT3B/E2F1/EDNRA/EGR1/GATA6/HIF3A/ITPR1/KCNK3/KCNMA1/KCNMB1/MYC/MYOCD/NDNF/NR4A2/PAM/PLAU/PRKCB/PTGIS/PTGS2/RGCC/RYR2/SFRP1/SLC2A4/SLC8A1/SOD3/SRF/STC1/TGFB3/TGFBR2	48
GO:0001933	negative regulation of protein phosphorylation	53/994	396/16992	1.4e-08	1.02e-06	7.4e-07	ABL1/ADARB1/ATF3/BDKRB1/BDKRB2/CCNB1/CDKN1A/CNKSR3/CORO1C/DCN/DMD/DUSP1/DUSP2/DUSP5/ERRFI1/FAM129A/FOXM1/GADD45B/HIPK3/IL6/ILK/JUN/KLF4/LATS2/LIF/LMO3/LRRK2/MYADM/MYC/MYOCD/NTRK3/PDE4D/PER1/PID1/PKIG/PLK1/PLPP3/PODN/PPP1R15A/PPP1R1A/PRKAG2/PRKAR2B/RGS2/SF	53
GO:2000146	negative regulation of cell motility	37/994	228/16992	1.5e-08	1.08e-06	7.83e-07	ADARB1/BCL2/BMP5/C16orf45/CCL2/CLIC4/CORO1C/CXCL12/CYGB/DCN/DLC1/DPYSL3/FGF2/IGFBP5/ILK/KANK1/KLF4/MYOCD/PHLDB2/PODN/PTGER4/RECK/RGCC/RHOB/SFRP1/SFRP2/SHH/SLIT2/SMAD7/SRF/STARD13/STC1/TBX5/THBS1/TPM1/TRIB1/VCL	37
GO:0007519	skeletal muscle tissue development	29/994	153/16992	1.64e-08	1.16e-06	8.41e-07	ASB2/ATF3/BCL2/BTG2/BVES/CDON/CFL2/COL19A1/DCN/EGR1/EGR2/FOS/FOXP2/HDAC4/HLF/KLHL41/LMOD3/MAFF/MEF2C/MEF2D/MYOCD/MYOM1/PITX1/PITX2/SHH/SOX17/SVIL/TCF21/TSC22D3	29
GO:0000226	microtubule cytoskeleton organization	57/994	443/16992	1.66e-08	1.16e-06	8.42e-07	ABL1/ASPM/AURKA/AURKB/BIRC5/C16orf45/CC2D2A/CCNB1/CDC20/CDK1/CENPA/CLIP3/CRYAB/DIXDC1/EML1/EPHA3/FGF10/FLNA/KIF11/KIF18B/KIF20A/KIF23/KIF2C/KIF4A/KIFC1/MAP1A/MAP1B/MAPT/MELK/MYBL2/NDC80/NEK2/NUSAP1/PCLAF/PHLDB2/PKD1/PLK1/PPP1R12A/PRC1/RACGAP1/RANBP3L/RCC1	57
GO:0042326	negative regulation of phosphorylation	56/994	432/16992	1.71e-08	1.18e-06	8.54e-07	ABL1/ADARB1/ATF3/BDKRB1/BDKRB2/CCNB1/CDKN1A/CNKSR3/CORO1C/DCN/DMD/DUSP1/DUSP2/DUSP5/ERRFI1/FAM129A/FOXM1/GADD45B/HDAC4/HIPK3/IL6/ILK/INHBA/JUN/KLF4/LATS2/LIF/LMO3/LRRK2/MAPT/MYADM/MYC/MYOCD/NTRK3/PDE4D/PER1/PID1/PKIG/PLK1/PLPP3/PODN/PPP1R15A/PPP1R1A/PRKAG	56
GO:1901654	response to ketone	32/994	181/16992	1.75e-08	1.19e-06	8.62e-07	ADCY5/AQP1/AR/CA9/CCL2/CDKN1A/DNMT3B/DUSP1/ERRFI1/FBXO32/FOS/FOSB/FOSL1/FOXP2/IL6/KLF2/KLF4/KLF9/MAOB/NTRK3/PCNA/PLN/PRKAA2/PTGER4/SFRP1/SLIT2/SLIT3/SREBF1/TGFB3/TGFBR3/THBS1/TYMS	32
GO:0019932	second-messenger-mediated signaling	37/994	230/16992	1.91e-08	1.28e-06	9.27e-07	AGTR1/AKAP6/ANK2/ATP1A2/ATP2B4/CACNA1C/CASQ2/CXCR4/DMD/DMPK/EDNRB/HDAC4/INPP5A/ITPR1/ITPR3/JPH2/LMCD1/LRRK2/MAPT/NCALD/NDNF/NFATC1/NFATC2/NFATC4/PDE2A/PDE4D/PLN/PRKG1/PTGFR/RCAN1/RCAN2/RGS2/RYR2/SELP/SLC8A1/THBS1/TMEM100	37
GO:0048762	mesenchymal cell differentiation	32/994	182/16992	2.01e-08	1.33e-06	9.63e-07	BCL2/BMP5/CORO1C/DACT3/EDNRA/EDNRB/EPHA3/EZH2/FGF10/FGFR1/GLIPR2/HAND2/MEF2C/OLFM1/PHLDB2/PITX2/RANBP3L/RGCC/SFRP1/SFRP2/SHH/SMAD7/SPRY1/TBX5/TCF21/TGFB1I1/TGFB3/TGFBR2/TGFBR3/TMEM100/WWTR1/ZEB2	32
GO:0007051	spindle organization	28/994	146/16992	2.21e-08	1.44e-06	1.05e-06	ASPM/AURKA/AURKB/BIRC5/CCNB1/CDC20/EML1/FLNA/KIF11/KIF23/KIF4A/KIFC1/MYBL2/NDC80/NEK2/PKD1/PLK1/PRC1/RACGAP1/RANBP3L/RCC1/SPAG5/STARD9/STIL/STMN1/TACC3/TPX2/TTK	28
GO:1901987	regulation of cell cycle phase transition	47/994	337/16992	2.59e-08	1.63e-06	1.18e-06	ATP2B4/AURKA/BCL2/BTG2/BUB1/BUB1B/C8orf4/CCNA2/CCNB1/CCND2/CDC20/CDC45/CDC6/CDCA5/CDK1/CDKN1A/CDT1/CENPE/CENPF/DCUN1D3/DLGAP5/DUSP1/E2F1/EZH2/FANCI/FBXL7/FGF10/FHL1/FOXN3/GTSE1/ID2/KANK2/KIF14/KNTC1/MAD2L1/NACC2/NDC80/PBX1/PCNA/PID1/PKD1/PLK1/RCC2/RGCC/SO	47
GO:0030048	actin filament-based movement	25/994	121/16992	2.66e-08	1.63e-06	1.18e-06	ACTC1/ACTN2/ANK2/ATP1A2/CACNA1C/CACNA2D1/CACNB2/DES/DMD/FLNA/KCND3/MYH2/MYH3/PARVA/PDE4B/PDE4D/PLN/RYR2/SCN4B/STC1/TMOD1/TNNT1/TNNT2/TPM1/TPM2	25
GO:0035051	cardiocyte differentiation	25/994	121/16992	2.66e-08	1.63e-06	1.18e-06	ACTC1/ACTN2/AKAP13/AKAP6/BVES/CCNB1/CDK1/FZD7/GATA6/HAND2/MEF2C/MYH11/MYOCD/NEXN/PDGFRA/PITX2/SGCB/SIK1/SLC8A1/SORBS2/SOX17/SPRY1/SRF/TBX5/TGFBR3	25
GO:0007091	metaphase/anaphase transition of mitotic cell cycle	15/994	46/16992	2.67e-08	1.63e-06	1.18e-06	BUB1/BUB1B/CCNB1/CDC6/CDT1/CENPE/CENPF/DLGAP5/DUSP1/MAD2L1/NDC80/PLK1/TACC3/TTK/UBE2C	15
GO:0010965	regulation of mitotic sister chromatid separation	15/994	46/16992	2.67e-08	1.63e-06	1.18e-06	BUB1/BUB1B/CCNB1/CDC6/CDT1/CENPE/CENPF/DLGAP5/DUSP1/MAD2L1/NDC80/PLK1/TACC3/TTK/UBE2C	15
GO:0051271	negative regulation of cellular component movement	38/994	243/16992	2.69e-08	1.63e-06	1.18e-06	ADARB1/BCL2/BMP5/C16orf45/CCL2/CLIC4/CORO1C/CXCL12/CYGB/DCN/DLC1/DPYSL3/FGF2/IGFBP5/ILK/KANK1/KLF4/MYOCD/PHLDB2/PODN/PTGER4/RECK/RGCC/RHOB/SFRP1/SFRP2/SHH/SLIT2/SMAD7/SRF/STARD13/STC1/TBX5/TGFBR3/THBS1/TPM1/TRIB1/VCL	38
GO:1901990	regulation of mitotic cell cycle phase transition	45/994	316/16992	2.72e-08	1.63e-06	1.18e-06	AURKA/BCL2/BTG2/BUB1/BUB1B/CCNA2/CCNB1/CCND2/CDC20/CDC45/CDC6/CDCA5/CDK1/CDKN1A/CDT1/CENPE/CENPF/DCUN1D3/DLGAP5/DUSP1/E2F1/EZH2/FANCI/FBXL7/FGF10/FHL1/FOXN3/GTSE1/ID2/KANK2/KIF14/KNTC1/MAD2L1/NACC2/NDC80/PBX1/PCNA/PID1/PKD1/PLK1/RCC2/RGCC/SOX4/TTK/UBE2C	45
GO:0010035	response to inorganic substance	60/994	485/16992	2.99e-08	1.77e-06	1.28e-06	ABL1/APBB1/AQP1/ATP2B4/BCL2/CACNA1H/CASQ2/CCNA2/CCNB1/CDK1/CLIC4/CPNE6/CRYAB/CYBRD1/DUSP1/ECT2/EZH2/FBLN5/FOS/FOSB/FOSL1/GNAO1/GSN/HAAO/ID2/IL6/ITPKB/ITPR3/JUN/JUNB/JUND/KCNK3/KCNMA1/KCNMB1/KLF2/KLF4/LRRK2/MAOB/MEF2C/NFATC4/NR4A3/PAM/PCNA/PDGFD/PLN/PTCH1/	60
GO:0008608	attachment of spindle microtubules to kinetochore	12/994	29/16992	3.09e-08	1.8e-06	1.31e-06	AURKB/CCNB1/CDT1/CENPE/ECT2/KIF2C/KNL1/NDC80/NEK2/RACGAP1/RCC2/SPAG5	12
GO:0043500	muscle adaptation	20/994	82/16992	3.53e-08	2.04e-06	1.48e-06	AKAP13/AKAP6/ATP2B4/ERRFI1/EZH2/GATA6/GSN/HAND2/HDAC4/IGFBP5/IL6ST/KLF4/LMCD1/MEF2C/MYOC/NR4A3/PDE5A/RGS2/TNNT1/TRIM63	20
GO:0044784	metaphase/anaphase transition of cell cycle	15/994	47/16992	3.71e-08	2.1e-06	1.52e-06	BUB1/BUB1B/CCNB1/CDC6/CDT1/CENPE/CENPF/DLGAP5/DUSP1/MAD2L1/NDC80/PLK1/TACC3/TTK/UBE2C	15
GO:1905818	regulation of chromosome separation	15/994	47/16992	3.71e-08	2.1e-06	1.52e-06	BUB1/BUB1B/CCNB1/CDC6/CDT1/CENPE/CENPF/DLGAP5/DUSP1/MAD2L1/NDC80/PLK1/TACC3/TTK/UBE2C	15
GO:0043502	regulation of muscle adaptation	18/994	68/16992	4.34e-08	2.43e-06	1.76e-06	AKAP13/AKAP6/ATP2B4/ERRFI1/FBXO32/HAND2/HDAC4/IGFBP5/IL6ST/KLF4/LMCD1/NR4A3/PDE5A/RGS2/SGCA/TNNT1/TRIM63/UTRN	18
GO:0032956	regulation of actin cytoskeleton organization	42/994	289/16992	4.41e-08	2.44e-06	1.77e-06	ABL1/ACTN2/AKAP13/ARHGAP6/CDC42EP3/CFL2/CIT/CSF3/CTGF/CXCL12/DIXDC1/DLC1/DSTN/EPHA3/FSCN1/GSN/ILK/JAM3/KANK1/LMOD1/LMOD3/LPAR1/MEF2C/MYADM/MYOC/NCKAP1L/NTRK3/PAM/PDGFRA/PHLDB2/PTGER4/RGCC/S1PR1/SEMA3E/SFRP1/SLIT2/STMN1/SYNPO/SYNPO2/TGFB3/TMOD1/TPM1	42
GO:0001666	response to hypoxia	46/994	332/16992	4.46e-08	2.44e-06	1.77e-06	ADAM8/APOLD1/AQP1/BCL2/CA9/CCL2/CCNA2/CCNB1/CD34/CPEB1/CPEB2/CXCL12/CXCR4/CYGB/DNMT3B/E2F1/EDNRA/EGR1/GATA6/HIF3A/ITPR1/KCNK3/KCNMA1/KCNMB1/MYC/MYOCD/NDNF/NR4A2/PAM/PLAU/PRKCB/PTGIS/PTGS2/RGCC/RYR2/SFRP1/SLC2A4/SLC8A1/SOD3/SRF/STC1/TGFB3/TGFBR2/TGFBR3/THB	46
GO:0007088	regulation of mitotic nuclear division	28/994	151/16992	4.72e-08	2.55e-06	1.85e-06	AURKA/BUB1/BUB1B/CCNB1/CDC6/CDCA5/CDT1/CENPE/CENPF/DLGAP5/DUSP1/KIF11/KNTC1/MAD2L1/MKI67/NDC80/NEK2/NUSAP1/PKD1/PKMYT1/PLK1/RANBP3L/RCC1/RGCC/TACC3/TPX2/TTK/UBE2C	28
GO:0051306	mitotic sister chromatid separation	15/994	48/16992	5.11e-08	2.73e-06	1.98e-06	BUB1/BUB1B/CCNB1/CDC6/CDT1/CENPE/CENPF/DLGAP5/DUSP1/MAD2L1/NDC80/PLK1/TACC3/TTK/UBE2C	15
GO:0035265	organ growth	27/994	143/16992	5.53e-08	2.93e-06	2.12e-06	ACACB/AKAP6/AR/BCL2/BNC2/CCNB1/CDK1/DDR2/ESR1/FGF10/FGF2/FGF7/FGFR1/GATA6/LATS2/LEPR/MEF2C/OSTN/S1PR1/SHH/SORBS2/STC1/TBX20/TBX5/TGFBR2/TGFBR3/ZFPM2	27
GO:0048565	digestive tract development	25/994	127/16992	7.3e-08	3.8e-06	2.76e-06	BCL2/CCNB1/CDKN1A/DCHS1/EDNRB/FAT4/FGF10/FOXF1/GATA5/GATA6/ID2/MYOCD/PDGFRA/PITX2/PKD1/PKDCC/RBPMS2/SFRP1/SFRP2/SHH/SOX17/TCF21/TGFB3/TGFBR2/TYMS	25
GO:0042063	gliogenesis	37/994	242/16992	7.46e-08	3.8e-06	2.76e-06	ABL1/ASPA/BIN1/C16orf45/CCL2/CDK1/CLU/CSPG4/CXCR4/EGR2/EZH2/FGF10/GPR183/GSN/ID2/IL6ST/ILK/LAMA2/LAMB2/LAMC3/LGI4/LIF/LPAR1/MAPT/MATN2/MYOC/NDN/NFIB/NTRK3/PLP1/PLPP3/ROR1/ROR2/SHH/SOX4/TSPAN2/ZNF488	37
GO:0051384	response to glucocorticoid	27/994	145/16992	7.47e-08	3.8e-06	2.76e-06	AKAP13/AQP1/BCHE/BCL2/CCL2/CDKN1A/DNMT3B/DUSP1/ERRFI1/FBXO32/FOS/FOSB/FOSL1/IL6/KLF9/MAOB/MDK/NTRK3/PAM/PCNA/PTGS2/SLIT2/SLIT3/STC1/TRIM63/TYMS/ZFP36	27
GO:0071900	regulation of protein serine/threonine kinase activity	58/994	474/16992	7.49e-08	3.8e-06	2.76e-06	ABL1/ADAM8/AKAP13/ATP2B4/C8orf4/CCNA2/CCNB1/CCND2/CDC6/CDK1/CDKN1A/CKS1B/CKS2/CSPG4/CXCR4/DUSP1/DUSP2/DUSP5/EZH2/FGF10/FGF2/FGFR1/GADD45B/GHR/HIPK3/ILK/IQGAP3/ITGA1/LATS2/LPAR1/LRRK2/MAP3K20/MAP3K8/MYOCD/NTRK3/PDE5A/PDGFD/PKD1/PKIG/PKMYT1/PLK1/PRKAG2/PRKA	58
GO:0051783	regulation of nuclear division	30/994	173/16992	7.62e-08	3.83e-06	2.78e-06	AURKA/BUB1/BUB1B/CCNB1/CDC20/CDC6/CDCA5/CDT1/CENPE/CENPF/DLGAP5/DUSP1/KIF11/KNTC1/LIF/MAD2L1/MKI67/NDC80/NEK2/NUSAP1/PKD1/PKMYT1/PLK1/RANBP3L/RCC1/RGCC/TACC3/TPX2/TTK/UBE2C	30
GO:0003206	cardiac chamber morphogenesis	24/994	119/16992	8.19e-08	4.04e-06	2.93e-06	ADAMTS1/BMP5/COL11A1/CYR61/FOXF1/GATA6/HAND1/HAND2/ID2/MEF2C/PARVA/PITX2/RYR2/SFRP2/SMAD7/SOX4/SRF/TBX20/TBX5/TGFBR2/TGFBR3/TNNT2/TPM1/ZFPM2	24
GO:1901861	regulation of muscle tissue development	24/994	119/16992	8.19e-08	4.04e-06	2.93e-06	AKAP6/BCL2/CCNB1/CDK1/CDON/CENPF/FGF2/FGFR1/FZD7/GATA6/HDAC4/IGFBP5/JPH2/KLHL41/MEF2C/MYOCD/SHH/SOX17/TBX20/TBX5/TGFBR2/TGFBR3/TSC22D3/ZFPM2	24
GO:0033045	regulation of sister chromatid segregation	17/994	64/16992	9.72e-08	4.75e-06	3.44e-06	BUB1/BUB1B/CCNB1/CDC6/CDCA5/CDT1/CENPE/CENPF/DLGAP5/DUSP1/FEN1/MAD2L1/NDC80/PLK1/TACC3/TTK/UBE2C	17
GO:0055123	digestive system development	26/994	138/16992	1.02e-07	4.91e-06	3.56e-06	BCL2/CCNB1/CDKN1A/DCHS1/EDNRB/FAT4/FGF10/FOXF1/GATA5/GATA6/ID2/MYOCD/PDGFRA/PITX2/PKD1/PKDCC/RBPMS2/SFRP1/SFRP2/SHH/SOX17/TCF21/TGFB3/TGFBR2/TYMS/WLS	26
GO:0060560	developmental growth involved in morphogenesis	33/994	205/16992	1.09e-07	5.23e-06	3.79e-06	ABL1/AURKA/CPNE6/CXCL12/DCLK1/DPYSL2/EPHA7/ESR1/FGF10/ILK/KIF26B/LAMB2/MAP1B/MAPT/NDN/NRP2/NTRK3/OLFM1/OSTN/PLXNA1/S1PR1/SEMA3G/SFRP1/SFRP2/SHH/SLIT2/SLIT3/SPG20/SPRY1/SRF/TGFBR2/VCL/ZEB2	33
GO:0030071	regulation of mitotic metaphase/anaphase transition	14/994	44/16992	1.11e-07	5.25e-06	3.8e-06	BUB1/BUB1B/CCNB1/CDC6/CDT1/CENPE/CENPF/DLGAP5/DUSP1/MAD2L1/NDC80/PLK1/TTK/UBE2C	14
GO:0007015	actin filament organization	46/994	343/16992	1.2e-07	5.62e-06	4.08e-06	ABL1/ACTC1/ACTN2/ARHGAP6/BCL2/CAP2/CDC42EP3/CFL2/CIT/CSF3/CTGF/CXCL12/DLC1/DPYSL3/DSTN/FLNA/FRY/FSCN1/GSN/KANK1/LMOD1/LMOD3/LPAR1/MYADM/MYOC/MYOM1/NCKAP1L/PDLIM3/PHLDB2/PTGER4/RGCC/RND1/S1PR1/SFRP1/SLIT2/SORBS1/SORBS2/SRF/STMN1/SYNPO/SYNPO2/TGFB3/TMOD1/TN	46
GO:0051145	smooth muscle cell differentiation	15/994	51/16992	1.26e-07	5.88e-06	4.26e-06	EDNRB/FGF10/FOXF1/GATA6/ITGA8/MEF2C/MYOCD/NFATC4/PITX2/PRDM6/RBPMS2/SGCB/SHH/SRF/ZEB1	15
GO:0048634	regulation of muscle organ development	24/994	122/16992	1.34e-07	6.2e-06	4.49e-06	AKAP6/BCL2/CCNB1/CDK1/CDON/CENPF/FGF2/FGFR1/FZD7/GATA6/HDAC4/IL6/JPH2/KLHL41/MEF2C/MYOCD/SHH/SOX17/TBX20/TBX5/TGFBR2/TGFBR3/TSC22D3/ZFPM2	24
GO:0072073	kidney epithelium development	26/994	140/16992	1.37e-07	6.27e-06	4.55e-06	ARG2/BCL2/CD34/DCHS1/EPCAM/EPHA7/FAT4/FGF2/FGFR1/ILK/KIF26B/LAMB2/LIF/MEF2C/MYC/PBX1/PECAM1/PKD1/PTCH1/SFRP1/SHH/SLIT2/SMAD7/SPRY1/TCF21/WWTR1	26
GO:0010959	regulation of metal ion transport	44/994	323/16992	1.43e-07	6.5e-06	4.71e-06	ABL1/ACTN2/AHNAK/AKAP6/ANK2/ATP1A2/ATP2B4/BCL2/BDKRB1/CACNA1C/CACNA2D1/CACNB2/CACNB4/CAMK2A/CASQ2/CCL2/CNKSR3/CNTN1/CXCL12/DMD/DMPK/FHL1/FLNA/FXYD6/FYN/GNAO1/JPH2/KCNMB1/MYLK/P2RX1/PDE4B/PDE4D/PER1/PLN/PRSS8/PTGS2/RYR2/SCN4B/SIK1/SLC8A1/SLMAP/STC1/STOM/UT	44
GO:0051899	membrane depolarization	21/994	97/16992	1.48e-07	6.59e-06	4.78e-06	ABL1/ANK2/ATP1A2/BCL2/CACNA1C/CACNA1H/CACNA2D1/CACNB2/CACNB4/DCN/FHL1/IFI6/JUN/LRRK2/MYOC/SCN11A/SCN4B/SCN7A/SLC8A1/SLMAP/SMAD7	21
GO:0055007	cardiac muscle cell differentiation	21/994	97/16992	1.48e-07	6.59e-06	4.78e-06	ACTC1/ACTN2/AKAP13/AKAP6/BVES/CCNB1/CDK1/FZD7/GATA6/MEF2C/MYH11/MYOCD/NEXN/PDGFRA/PITX2/SGCB/SIK1/SLC8A1/SORBS2/SRF/TBX5	21
GO:1902099	regulation of metaphase/anaphase transition of cell cycle	14/994	45/16992	1.52e-07	6.65e-06	4.82e-06	BUB1/BUB1B/CCNB1/CDC6/CDT1/CENPE/CENPF/DLGAP5/DUSP1/MAD2L1/NDC80/PLK1/TTK/UBE2C	14
GO:0060045	positive regulation of cardiac muscle cell proliferation	10/994	22/16992	1.52e-07	6.65e-06	4.82e-06	CCNB1/CDK1/FGF2/FGFR1/GATA6/MEF2C/TBX20/TBX5/TGFBR3/ZFPM2	10
GO:0032844	regulation of homeostatic process	55/994	449/16992	1.58e-07	6.82e-06	4.94e-06	ABL1/ADAM8/ADCY5/AGTR1/AKAP6/ANK2/ATP1A2/AURKB/BCL2/BDKRB1/CACNA1C/CASQ2/DCN/DMD/EDNRB/FGF2/FHL1/FYN/ID2/IFI6/IL6/INHBA/ITPKB/ITPR1/ITPR3/JPH2/LDLR/LEPR/LRRK2/MAPK15/MYC/MYOC/NCKAP1L/NEK2/NPR1/NR4A3/NRXN1/PDE4D/PDK4/PLN/PRKAA2/PTGER3/PTGS2/RYR2/RYR3/S1PR1	55
GO:0003300	cardiac muscle hypertrophy	17/994	66/16992	1.59e-07	6.82e-06	4.94e-06	AKAP13/AKAP6/ATP2B4/ERRFI1/EZH2/GATA6/HAND2/HDAC4/IL6ST/LMCD1/MEF2C/NR4A3/PDE5A/RGS2/RYR2/SORBS2/TRIM63	17
GO:0060421	positive regulation of heart growth	12/994	33/16992	1.7e-07	7.23e-06	5.24e-06	ACACB/AKAP6/CCNB1/CDK1/FGF2/FGFR1/GATA6/MEF2C/TBX20/TBX5/TGFBR3/ZFPM2	12
GO:0060048	cardiac muscle contraction	24/994	124/16992	1.85e-07	7.82e-06	5.67e-06	ACTC1/ANK2/ATP1A2/CACNA1C/CACNA2D1/CACNB2/CASQ2/CTGF/DMD/FLNA/HDAC4/KCND3/PDE4B/PDE4D/PDE5A/PLN/RGS2/RYR2/SCN4B/SLC8A1/SMAD7/STC1/TNNT2/TPM1	24
GO:0010001	glial cell differentiation	30/994	180/16992	1.89e-07	7.9e-06	5.73e-06	ABL1/ASPA/BIN1/CDK1/CLU/CXCR4/EGR2/FGF10/GSN/ID2/IL6ST/ILK/LAMA2/LAMB2/LAMC3/LGI4/LIF/LPAR1/MAPT/MYOC/NFIB/NTRK3/PLP1/PLPP3/ROR1/ROR2/SHH/SOX4/TSPAN2/ZNF488	30
GO:0031960	response to corticosteroid	28/994	161/16992	1.93e-07	8.03e-06	5.82e-06	AKAP13/AQP1/BCHE/BCL2/CCL2/CDKN1A/CTGF/DNMT3B/DUSP1/ERRFI1/FBXO32/FOS/FOSB/FOSL1/IL6/KLF9/MAOB/MDK/NTRK3/PAM/PCNA/PTGS2/SLIT2/SLIT3/STC1/TRIM63/TYMS/ZFP36	28
GO:0033047	regulation of mitotic sister chromatid segregation	15/994	53/16992	2.22e-07	9.13e-06	6.62e-06	BUB1/BUB1B/CCNB1/CDC6/CDT1/CENPE/CENPF/DLGAP5/DUSP1/MAD2L1/NDC80/PLK1/TACC3/TTK/UBE2C	15
GO:0014074	response to purine-containing compound	26/994	144/16992	2.45e-07	9.95e-06	7.22e-06	AKAP6/AQP1/CASQ2/CCL2/DNMT3B/DUSP1/FOS/FOSB/FOSL1/IGFBP5/IL6/JUN/JUNB/JUND/P2RX1/PDE2A/PER1/PLA2G5/PTGS2/RAP1A/RYR2/RYR3/SLC26A6/SLC8A1/SREBF1/STC1	26
GO:0035637	multicellular organismal signaling	31/994	192/16992	2.46e-07	9.95e-06	7.22e-06	ABCC9/ANK2/ATP1A2/ATP2B4/CACNA1C/CACNA1H/CACNA2D1/CACNB2/CACNB4/CASQ2/DMPK/FLNA/FXYD6/IL6/ITPR1/ITPR3/JAM3/KCND3/KCNK3/NFASC/NPR1/P2RX1/PDE4D/PLN/RYR2/RYR3/S1PR1/SCN11A/SCN4B/SCN7A/SLC8A1	31
GO:0016202	regulation of striated muscle tissue development	23/994	117/16992	2.47e-07	9.95e-06	7.22e-06	AKAP6/BCL2/CCNB1/CDK1/CDON/CENPF/FGF2/FGFR1/FZD7/GATA6/HDAC4/JPH2/KLHL41/MEF2C/MYOCD/SHH/SOX17/TBX20/TBX5/TGFBR2/TGFBR3/TSC22D3/ZFPM2	23
GO:0007062	sister chromatid cohesion	24/994	126/16992	2.53e-07	1e-05	7.28e-06	AURKB/BIRC5/BUB1/BUB1B/CDC20/CDCA5/CDCA8/CENPA/CENPE/CENPF/CENPU/FEN1/KIF22/KIF2C/KNL1/KNTC1/MAD2L1/NDC80/NUF2/PLK1/RCC2/SKA1/SPC24/ZWINT	24
GO:0051304	chromosome separation	17/994	68/16992	2.54e-07	1e-05	7.28e-06	BUB1/BUB1B/CCNB1/CDC6/CDT1/CENPE/CENPF/DLGAP5/DUSP1/MAD2L1/NCAPD2/NDC80/PLK1/TACC3/TOP2A/TTK/UBE2C	17
GO:0030278	regulation of ossification	30/994	184/16992	3.09e-07	1.21e-05	8.79e-06	BCL2/CYR61/DDR2/EGR2/HAND2/HDAC4/ID2/IGFBP5/IL6/IL6ST/ILK/JUND/MEF2C/MGP/OMD/OSTN/PBX1/PDLIM7/PKDCC/PTCH1/PTGER4/RANBP3L/S1PR1/SFRP1/SFRP2/SLC8A1/TGFB3/TMEM119/ZBTB16/ZHX3	30
GO:0055023	positive regulation of cardiac muscle tissue growth	11/994	29/16992	3.39e-07	1.31e-05	9.5e-06	AKAP6/CCNB1/CDK1/FGF2/FGFR1/GATA6/MEF2C/TBX20/TBX5/TGFBR3/ZFPM2	11
GO:0071173	spindle assembly checkpoint	11/994	29/16992	3.39e-07	1.31e-05	9.5e-06	BUB1/BUB1B/CCNB1/CDT1/CENPF/DUSP1/KNL1/MAD2L1/NDC80/PLK1/TTK	11
GO:0009612	response to mechanical stimulus	32/994	205/16992	3.48e-07	1.34e-05	9.69e-06	AQP1/ATP1A2/BDKRB1/BTG2/CCL2/CCNB1/COL11A1/CXCL12/DCN/DENND5A/DMD/FOS/FOSB/FOSL1/FOXP2/FYN/HDAC4/IL6/JUN/JUNB/JUND/MEIS2/NRXN1/PDE2A/PKD1/PTCH1/PTGER4/PTGS2/RYR2/SLC8A1/TGFBR2/THBS1	32
GO:0040013	negative regulation of locomotion	37/994	257/16992	3.54e-07	1.34e-05	9.74e-06	ADARB1/BCL2/BMP5/C16orf45/CCL2/CLIC4/CORO1C/CXCL12/CYGB/DCN/DLC1/DPYSL3/FGF2/IGFBP5/ILK/KANK1/KLF4/MYOCD/PHLDB2/PODN/PTGER4/RECK/RGCC/RHOB/SFRP1/SFRP2/SHH/SLIT2/SMAD7/SRF/STARD13/STC1/TBX5/THBS1/TPM1/TRIB1/VCL	37
GO:0061448	connective tissue development	35/994	236/16992	3.55e-07	1.34e-05	9.74e-06	ACTA2/ARID5B/BMP5/CD34/COL10A1/COL11A1/CSGALNACT1/CTGF/CYR61/EGR1/FGF2/FGFR1/HAND1/HAND2/ID2/MEF2C/MEF2D/MGP/NFIB/PDGFD/PITX1/PKD1/PKDCC/ROR2/SFRP2/SLC25A25/SPG20/SRF/STC1/TGFBR2/THRA/TYMS/WNT9A/ZBTB16/ZEB1	35
GO:0001823	mesonephros development	21/994	102/16992	3.64e-07	1.36e-05	9.85e-06	ARG2/BCL2/DCHS1/EPCAM/FAT4/FGF10/FGF2/FGFR1/ILK/KIF26B/MYC/PBX1/PKD1/PTCH1/SFRP1/SHH/SLIT2/SMAD7/SPRY1/TCF21/ZBTB16	21
GO:0001558	regulation of cell growth	48/994	379/16992	3.65e-07	1.36e-05	9.85e-06	ABL1/AGTR1/AKAP6/APBB1/BCL2/BDKRB1/CDKN1A/CPNE6/CRYAB/CTGF/CXCL12/CYR61/DACT3/DCUN1D3/DPYSL2/EPHA7/ESM1/FAM107A/FBLN5/FHL1/HBEGF/IGFBP5/ILK/INHBA/KIF14/LTBP4/MAP1B/MAPT/MYOCD/NPR1/NTRK3/OLFM1/OSTN/PLXNA1/RASGRP2/RERG/SEMA3G/SFRP1/SFRP2/SGK1/SLIT2/SLIT3/SO	48
GO:0006260	DNA replication	40/994	291/16992	4.15e-07	1.54e-05	1.11e-05	BMP5/CCNE1/CDC45/CDC6/CDK1/CDT1/CHAF1B/CHTF18/DTL/EXO1/FEN1/FGF10/FGFR1/GINS1/IL6/JUN/LIG1/MCM10/MCM2/MCM4/NFIA/NFIB/NFIC/NFIX/ORC6/PCLAF/PCNA/PDGFRA/PID1/POLD1/POLQ/RECQL4/REV3L/RFC4/RNASEH2A/RRM2/TGFB3/TIMELESS/TONSL/TSPYL2	40
GO:0071459	protein localization to chromosome, centromeric region	9/994	19/16992	4.19e-07	1.54e-05	1.12e-05	AURKB/BUB1B/CDK1/CDT1/CENPA/KNL1/NDC80/RCC2/TTK	9
GO:0045844	positive regulation of striated muscle tissue development	16/994	63/16992	4.52e-07	1.63e-05	1.19e-05	AKAP6/BCL2/CCNB1/CDK1/CDON/FGF2/FGFR1/GATA6/MEF2C/MYOCD/SHH/SOX17/TBX20/TBX5/TGFBR3/ZFPM2	16
GO:0048636	positive regulation of muscle organ development	16/994	63/16992	4.52e-07	1.63e-05	1.19e-05	AKAP6/BCL2/CCNB1/CDK1/CDON/FGF2/FGFR1/GATA6/MEF2C/MYOCD/SHH/SOX17/TBX20/TBX5/TGFBR3/ZFPM2	16
GO:0046683	response to organophosphorus	24/994	130/16992	4.62e-07	1.66e-05	1.2e-05	AKAP6/AQP1/CCL2/DUSP1/FOS/FOSB/FOSL1/IGFBP5/JUN/JUNB/JUND/LPAR1/P2RX1/PDE2A/PER1/PLA2G5/PTGS2/RAP1A/RYR3/SLC26A6/SLC8A1/SREBF1/STC1/TYMS	24
GO:0010038	response to metal ion	42/994	315/16992	4.95e-07	1.77e-05	1.28e-05	APBB1/AQP1/BCL2/CACNA1H/CASQ2/CCNB1/CDK1/CLIC4/CPNE6/CYBRD1/DUSP1/ECT2/FOS/FOSB/GSN/HAAO/ID2/IL6/ITPKB/ITPR3/JUN/JUNB/JUND/KCNK3/KCNMA1/KCNMB1/LRRK2/MAOB/MEF2C/NFATC4/PAM/PCNA/PLN/PTGS2/RASGRP2/RYR2/RYR3/SHH/SLC25A23/SOD3/THBS1/TNNT2	42
GO:0031577	spindle checkpoint	12/994	36/16992	5.08e-07	1.8e-05	1.3e-05	AURKB/BUB1/BUB1B/CCNB1/CDT1/CENPF/DUSP1/KNL1/MAD2L1/NDC80/PLK1/TTK	12
GO:1902903	regulation of supramolecular fiber organization	39/994	283/16992	5.41e-07	1.9e-05	1.38e-05	ABL1/ACTN2/AKAP13/ARHGAP6/C16orf45/CDC42EP3/CFL2/CIT/CLIP3/CLU/CRYAB/CSF3/CTGF/CXCL12/DLC1/DSTN/GSN/KANK1/LMOD1/LMOD3/LPAR1/MAPT/MEF2C/MYADM/MYOC/NCKAP1L/PHLDB2/PTGER4/RGCC/RGS2/S1PR1/SFRP1/SLIT2/STMN1/SYNPO/SYNPO2/TGFB3/TMOD1/TPM1	39
GO:0010810	regulation of cell-substrate adhesion	29/994	179/16992	5.55e-07	1.94e-05	1.41e-05	ABI3BP/ARHGAP6/BCL2/CCDC80/CORO1C/CYR61/DLC1/EPHA3/FBLN2/FLNA/FOXF1/FZD7/ILK/ITGA5/KANK1/MYADM/MYOC/NDNF/PHLDB2/PLAU/RAC3/RCC2/SEMA3E/SFRP1/SMOC2/THBS1/UNC13D/UTRN/VIT	29
GO:0010927	cellular component assembly involved in morphogenesis	20/994	96/16992	5.63e-07	1.95e-05	1.41e-05	ACTC1/ACTN2/AKAP13/ANK2/CASQ2/CFL2/ILK/KLHL41/KNL1/MEF2C/MYH11/MYH3/MYOM1/NFASC/PDGFRA/PHLDB2/RFX2/SRF/TMOD1/TPM1	20
GO:0055006	cardiac cell development	16/994	64/16992	5.7e-07	1.95e-05	1.41e-05	ACTC1/ACTN2/AKAP6/BVES/CCNB1/CDK1/MYH11/NEXN/PDGFRA/PITX2/SGCB/SLC8A1/SORBS2/SPRY1/SRF/TGFBR3	16
GO:1901863	positive regulation of muscle tissue development	16/994	64/16992	5.7e-07	1.95e-05	1.41e-05	AKAP6/BCL2/CCNB1/CDK1/CDON/FGF2/FGFR1/GATA6/MEF2C/MYOCD/SHH/SOX17/TBX20/TBX5/TGFBR3/ZFPM2	16
GO:0001656	metanephros development	19/994	88/16992	6.02e-07	2.04e-05	1.48e-05	BCL2/CD34/EGR1/FAT4/FBN1/FGF10/ID2/ITGA8/KIF26B/LAMB2/LIF/MYC/PDGFRA/PKD1/PTCH1/SHH/SPRY1/TCF21/WWTR1	19
GO:0055117	regulation of cardiac muscle contraction	17/994	72/16992	6.13e-07	2.07e-05	1.5e-05	ANK2/ATP1A2/CACNA1C/CASQ2/CTGF/DMD/FLNA/HDAC4/PDE4B/PDE4D/PDE5A/PLN/RGS2/RYR2/SLC8A1/SMAD7/STC1	17
GO:1902806	regulation of cell cycle G1/S phase transition	26/994	151/16992	6.4e-07	2.15e-05	1.56e-05	ATP2B4/AURKA/BCL2/BTG2/C8orf4/CCNB1/CCND2/CDC45/CDC6/CDK1/CDKN1A/DCUN1D3/E2F1/EZH2/FGF10/FHL1/GTSE1/ID2/KANK2/KIF14/NACC2/PCNA/PID1/PKD1/RGCC/SOX4	26
GO:0010880	regulation of release of sequestered calcium ion into cytosol by sarcoplasmic reticulum	10/994	25/16992	6.54e-07	2.18e-05	1.58e-05	AKAP6/ANK2/ATP1A2/CACNA1C/CASQ2/DMD/PDE4D/PLN/RYR2/SLC8A1	10
GO:0048286	lung alveolus development	12/994	37/16992	7.12e-07	2.34e-05	1.7e-05	ERRFI1/FGF10/FOXF1/FOXP2/GATA6/IGFBP5/LIF/MYOCD/PKDCC/STK40/TCF21/TGFB3	12
GO:0048662	negative regulation of smooth muscle cell proliferation	12/994	37/16992	7.12e-07	2.34e-05	1.7e-05	CNN1/IGFBP5/ILK/KLF4/MYOCD/NPR1/OGN/TGFB3/TNFAIP3/TPM1/TRIB1/VIPR2	12
GO:0051592	response to calcium ion	22/994	115/16992	7.34e-07	2.4e-05	1.74e-05	CASQ2/CLIC4/CPNE6/DUSP1/ECT2/FOS/FOSB/IL6/ITPKB/ITPR3/JUN/JUNB/JUND/KCNMA1/KCNMB1/MEF2C/RASGRP2/RYR2/RYR3/SLC25A23/THBS1/TNNT2	22
GO:0031099	regeneration	28/994	173/16992	8.85e-07	2.87e-05	2.08e-05	AURKA/BCL2/CCL2/CCNA2/CCNB1/CDK1/CDKN1A/CPQ/CXCL12/EZH2/FGF10/FZD7/GSN/JAM3/JUN/KLF4/LAMB2/LARGE1/MATN2/MKI67/NR4A3/NTRK3/PCNA/RAP1A/SGCA/TGFBR2/TGFBR3/TYMS	28
GO:0034329	cell junction assembly	30/994	194/16992	9.85e-07	3.18e-05	2.3e-05	ACTN2/ANK2/ARHGAP6/BCL2/CLDN5/CORO1C/DLC1/ECT2/EPHA3/FERMT2/FLNA/FLNC/FSCN1/ILK/ITGA5/LIMS2/MPP7/MYOC/NFASC/PHLDB2/RAP1A/RCC2/SFRP1/SMAD7/SORBS1/SRF/THBS1/TLN1/TNS1/VCL	30
GO:0007178	transmembrane receptor protein serine/threonine kinase signaling pathway	41/994	312/16992	9.92e-07	3.18e-05	2.3e-05	ABL1/BMP5/CCL2/CHRDL1/CLDN5/CYR61/EGR1/FBN1/FERMT2/FGF10/FOS/FSTL1/GATA6/GREM2/ILK/INHBA/ITGA8/JUN/KLF10/LTBP4/MYOCD/PPM1L/RBPMS/RBPMS2/ROR2/RYR2/SFRP1/SFRP2/SHH/SMAD7/SPG20/TBX20/TGFB1I1/TGFB3/TGFBR2/TGFBR3/THBS1/TMEM100/TTK/WWTR1/ZEB1	41
GO:0003205	cardiac chamber development	26/994	155/16992	1.07e-06	3.42e-05	2.48e-05	ADAMTS1/ANK2/BMP5/COL11A1/CYR61/FOXF1/GATA6/HAND1/HAND2/ID2/MEF2C/MYOCD/PARVA/PITX2/RYR2/SFRP2/SMAD7/SOX4/SRF/TBX20/TBX5/TGFBR2/TGFBR3/TNNT2/TPM1/ZFPM2	26
GO:0060425	lung morphogenesis	14/994	52/16992	1.1e-06	3.46e-05	2.51e-05	FGF10/FGF7/FOXF1/FOXP2/HHIP/LIF/NFIB/PITX2/SHH/SPRY1/SRF/STK40/TCF21/TGFBR2	14
GO:2000021	regulation of ion homeostasis	30/994	195/16992	1.1e-06	3.46e-05	2.51e-05	ABL1/AGTR1/AKAP6/ANK2/ATP1A2/BCL2/BDKRB1/CACNA1C/CASQ2/DCN/DMD/EDNRB/FGF2/FHL1/FYN/IFI6/ITPR1/ITPR3/JPH2/LRRK2/MYOC/NPR1/PDE4D/PLN/RYR2/RYR3/SLC25A23/SLC8A1/SLMAP/SMAD7	30
GO:0034501	protein localization to kinetochore	8/994	16/16992	1.13e-06	3.52e-05	2.55e-05	AURKB/BUB1B/CDK1/CDT1/KNL1/NDC80/RCC2/TTK	8
GO:0030335	positive regulation of cell migration	48/994	395/16992	1.22e-06	3.8e-05	2.75e-05	ADAM8/ADGRA2/AMOTL1/BCL2/BDKRB1/CCL2/CPEB1/CXCL12/CXCL2/CYR61/DDR2/F10/FGF10/FGF2/FGF7/FGFR1/FLNA/FOXF1/GLIPR2/GTSE1/HBEGF/HDAC4/HMCN2/IL6/ILK/ITGA5/JUN/LPAR1/MCAM/MYADM/MYLK/MYOC/NCKAP1L/NRP2/NTRK3/PDGFD/PDGFRA/PLAU/PLPP3/PTGS2/RHOB/ROR2/S1PR1/SELP/SLC8A	48
GO:0030900	forebrain development	45/994	361/16992	1.31e-06	4.04e-05	2.93e-05	AQP1/ASPM/ATP2B4/BTG2/C16orf45/CDON/CXCL12/DCLK1/DIXDC1/DLC1/E2F1/EPHB2/EZH2/FAT4/FGF10/FGFR1/FLNA/FOXP2/FYN/GNAO1/H2AFX/ID2/INHBA/KIF14/LPAR1/LRP8/LRRK2/MDK/MEF2C/NFIB/NR4A2/NR4A3/PITX1/PITX2/PRKG1/RAC3/SHH/SLC8A1/SLIT2/SRF/STIL/TACC1/TACC2/TACC3/ZEB2	45
GO:0021782	glial cell development	18/994	84/16992	1.33e-06	4.08e-05	2.96e-05	ASPA/CLU/GSN/ID2/ILK/LAMB2/LAMC3/LGI4/LPAR1/MAPT/MYOC/PLP1/ROR1/ROR2/SHH/SOX4/TSPAN2/ZNF488	18
GO:0001704	formation of primary germ layer	22/994	119/16992	1.34e-06	4.1e-05	2.97e-05	COL11A1/COL7A1/DUSP1/DUSP2/DUSP5/ETS2/FGFR1/FOXF1/FZD7/GATA6/HAND1/INHBA/ITGA5/ITGA7/ITGA8/KLF4/NR4A3/SFRP2/SOX17/SRF/TBX20/WLS	22
GO:0051272	positive regulation of cellular component movement	50/994	420/16992	1.35e-06	4.1e-05	2.97e-05	ADAM8/ADGRA2/AMOTL1/BCL2/BDKRB1/CCL2/CPEB1/CXCL12/CXCL2/CYR61/DDR2/EPCAM/F10/FGF10/FGF2/FGF7/FGFR1/FLNA/FOXF1/GLIPR2/GTSE1/HBEGF/HDAC4/HMCN2/IL6/ILK/ITGA5/JUN/LPAR1/MCAM/MYADM/MYLK/MYOC/NCKAP1L/NRP2/NTRK3/PDGFD/PDGFRA/PLAU/PLPP3/PTGS2/RHOB/ROR2/S1PR1/SELP	50
GO:0007160	cell-matrix adhesion	30/994	197/16992	1.37e-06	4.12e-05	2.99e-05	ACTN2/ARHGAP6/BCL2/CD34/CORO1C/CTGF/DLC1/EMILIN1/EPHA3/FBLN5/FERMT2/ILK/ITGA1/ITGA7/ITGA8/JAM3/MYOC/PHLDB2/PKD1/PLAU/RCC2/SEMA3E/SFRP1/SGCE/SNED1/SORBS1/SRF/THBS1/UTRN/VCL	30
GO:1901342	regulation of vasculature development	34/994	239/16992	1.38e-06	4.13e-05	3e-05	ADGRA2/ADGRB3/AQP1/C3/CCL2/CD34/CMA1/DCN/EGR1/FGF2/GATA6/HSPB6/IL6/ITGA5/KLF4/MYOCD/NPR1/PDGFD/PRKCB/PTGIS/PTGS2/RAP1A/RGCC/RHOB/SEMA3E/SFRP1/SFRP2/STARD13/TGFBR2/THBS1/TMEM100/TNFAIP3/TNFSF12/VEGFD	34
GO:0090068	positive regulation of cell cycle process	35/994	250/16992	1.42e-06	4.21e-05	3.05e-05	AURKA/AURKB/BTG2/CCNB1/CCND2/CDC45/CDC6/CDCA5/CDK1/CDKN1A/CDT1/CIT/CTGF/DLGAP5/E2F1/ECT2/FEN1/FGFR1/GATA6/GTSE1/ID2/KIF14/KIF23/MAD2L1/NDC80/NUSAP1/PBX1/PCNA/RACGAP1/RANBP3L/RCC2/RGCC/SOX4/SVIL/UBE2C	35
GO:0000083	regulation of transcription involved in G1/S transition of mitotic cell cycle	10/994	27/16992	1.52e-06	4.46e-05	3.23e-05	CCNE1/CDC45/CDC6/CDK1/CDT1/E2F1/ID2/PCNA/RRM2/TYMS	10
GO:0007094	mitotic spindle assembly checkpoint	10/994	27/16992	1.52e-06	4.46e-05	3.23e-05	BUB1/BUB1B/CCNB1/CDT1/CENPF/DUSP1/MAD2L1/NDC80/PLK1/TTK	10
GO:2000147	positive regulation of cell motility	49/994	410/16992	1.54e-06	4.5e-05	3.27e-05	ADAM8/ADGRA2/AMOTL1/BCL2/BDKRB1/CCL2/CPEB1/CXCL12/CXCL2/CYR61/DDR2/EPCAM/F10/FGF10/FGF2/FGF7/FGFR1/FLNA/FOXF1/GLIPR2/GTSE1/HBEGF/HDAC4/HMCN2/IL6/ILK/ITGA5/JUN/LPAR1/MCAM/MYADM/MYLK/MYOC/NCKAP1L/NRP2/NTRK3/PDGFD/PDGFRA/PLAU/PLPP3/PTGS2/RHOB/ROR2/S1PR1/SELP	49
GO:0061564	axon development	53/994	458/16992	1.56e-06	4.54e-05	3.29e-05	ABL1/ADARB1/APBB1/BCL2/BOC/CELSR3/CXCL12/DCLK1/DOK6/DPYSL2/EGR2/EPHA3/EPHA7/EPHB2/ETV4/FYN/GFRA1/ILK/JAM3/JUN/KLF4/LAMA2/LAMB2/MAP1B/MAPT/MATN2/NCAM1/NDN/NFASC/NFIB/NR4A2/NR4A3/NRP2/NRXN1/NTRK3/OGN/OLFM1/PDLIM7/PLP1/PLPPR4/PLXNA1/RPS6KA5/SEMA3G/SHH/SLIT2/	53
GO:0006942	regulation of striated muscle contraction	18/994	85/16992	1.6e-06	4.62e-05	3.35e-05	ANK2/ATP1A2/CACNA1C/CASQ2/CTGF/DMD/DMPK/FLNA/HDAC4/PDE4B/PDE4D/PDE5A/PLN/RGS2/RYR2/SLC8A1/SMAD7/STC1	18
GO:2000045	regulation of G1/S transition of mitotic cell cycle	24/994	139/16992	1.63e-06	4.67e-05	3.39e-05	AURKA/BCL2/BTG2/CCNB1/CCND2/CDC45/CDC6/CDK1/CDKN1A/DCUN1D3/E2F1/EZH2/FGF10/FHL1/GTSE1/ID2/KANK2/KIF14/NACC2/PCNA/PID1/PKD1/RGCC/SOX4	24
GO:0070509	calcium ion import	26/994	159/16992	1.77e-06	5.05e-05	3.66e-05	ABL1/AKAP6/ANK2/ATP1A2/ATP2B4/BDKRB1/CACNA1C/CACNA1H/CACNA2D1/CACNB2/CASQ2/CCL2/CXCL12/DMD/FGF2/FYN/ITPR1/ITPR3/JPH2/PDE4D/PLN/RYR2/RYR3/SLC25A23/SLC8A1/STC1	26
GO:0055025	positive regulation of cardiac muscle tissue development	12/994	40/16992	1.83e-06	5.18e-05	3.76e-05	AKAP6/CCNB1/CDK1/FGF2/FGFR1/GATA6/MEF2C/MYOCD/TBX20/TBX5/TGFBR3/ZFPM2	12
GO:0001501	skeletal system development	55/994	485/16992	1.86e-06	5.27e-05	3.82e-05	ADAMTS4/AKAP13/BMP5/COL10A1/COL11A1/COL19A1/CSGALNACT1/CTGF/CYR61/DCHS1/ETS2/FAT4/FBN1/FGF2/FGFR1/FOXN3/HAND1/HAND2/HDAC4/HHIP/KLF10/MEF2C/MEF2D/MEIS1/MGP/MTHFD1L/MYOC/NFIB/PBX1/PDGFRA/PITX1/PITX2/PKD1/PKDCC/PRELP/PTGER4/RAB23/RANBP3L/ROR2/SFRP1/SFRP2/SHH	55
GO:0000075	cell cycle checkpoint	32/994	221/16992	1.9e-06	5.34e-05	3.87e-05	AURKA/AURKB/BTG2/BUB1/BUB1B/CCNB1/CDC45/CDC6/CDK1/CDKN1A/CDT1/CENPF/DTL/DUSP1/E2F1/FANCI/FOXN3/GTSE1/H2AFX/KNL1/KNTC1/MAD2L1/MAP3K20/NDC80/PCNA/PLK1/RGCC/SOX4/TOP2A/TTK/WNT9A/ZWINT	32
GO:0050673	epithelial cell proliferation	43/994	343/16992	1.93e-06	5.4e-05	3.91e-05	AR/BCL2L2/BMP5/CCL2/CD34/CDH3/CXCL12/EDNRB/EGR3/ERRFI1/ESR1/ETV4/FGF10/FGF2/FGF7/FOXP2/FZD7/ID2/IGFBP5/IL6/IQGAP3/JUN/KLF9/LIMS2/MEF2C/MYC/NFIB/NME1/NR4A1/NR4A3/NRP2/PTCH1/RGCC/SFRP1/SFRP2/SHH/TGFBR3/THBS1/TNFAIP3/TNFSF12/VEGFD/WFDC1/ZFP36	43
GO:0040017	positive regulation of locomotion	51/994	438/16992	2.05e-06	5.69e-05	4.13e-05	ADAM8/ADGRA2/AMOTL1/BCL2/BDKRB1/BVES/CCL2/CPEB1/CXCL12/CXCL2/CYR61/DDR2/EPCAM/F10/FGF10/FGF2/FGF7/FGFR1/FLNA/FOXF1/GLIPR2/GTSE1/HBEGF/HDAC4/HMCN2/IL6/ILK/ITGA5/JUN/LPAR1/MCAM/MYADM/MYLK/MYOC/NCKAP1L/NRP2/NTRK3/PDGFD/PDGFRA/PLAU/PLPP3/PTGS2/RHOB/ROR2/S1PR1	51
GO:1903779	regulation of cardiac conduction	16/994	70/16992	2.08e-06	5.74e-05	4.16e-05	ABCC9/ANK2/ATP1A2/ATP2B4/CASQ2/DMPK/FLNA/FXYD6/ITPR1/ITPR3/NPR1/PDE4D/PLN/RYR2/RYR3/SLC8A1	16
GO:0060043	regulation of cardiac muscle cell proliferation	11/994	34/16992	2.14e-06	5.87e-05	4.26e-05	CCNB1/CDK1/FGF2/FGFR1/GATA6/MEF2C/TBX20/TBX5/TGFBR2/TGFBR3/ZFPM2	11
GO:0007093	mitotic cell cycle checkpoint	25/994	151/16992	2.2e-06	6.02e-05	4.36e-05	AURKA/BTG2/BUB1/BUB1B/CCNB1/CDK1/CDKN1A/CDT1/CENPF/DUSP1/E2F1/FANCI/FOXN3/GTSE1/KNTC1/MAD2L1/NDC80/PCNA/PLK1/RGCC/SOX4/TOP2A/TTK/WNT9A/ZWINT	25
GO:0050678	regulation of epithelial cell proliferation	38/994	289/16992	2.42e-06	6.57e-05	4.76e-05	AR/BMP5/CCL2/CDH3/CXCL12/EDNRB/EGR3/ERRFI1/ETV4/FGF10/FGF2/FGF7/FOXP2/FZD7/IL6/IQGAP3/JUN/KLF9/LIMS2/MEF2C/MYC/NFIB/NME1/NR4A1/NR4A3/NRP2/PTCH1/RGCC/SFRP1/SFRP2/SHH/TGFBR3/THBS1/TNFAIP3/TNFSF12/VEGFD/WFDC1/ZFP36	38
GO:0010720	positive regulation of cell development	52/994	453/16992	2.49e-06	6.71e-05	4.87e-05	AKAP6/APBB1/ASPA/ASPM/AURKA/BCL2/BIN1/BMP5/CDON/CLDN5/CNTN1/CPEB1/CPNE6/CXCL12/CXCR4/DNMT3B/DPYSL3/ECT2/EPHA3/EPHB2/EZH2/FGFR1/FLNA/FYN/ID2/IL6/IL6ST/ILK/LIF/LPAR1/LRP8/MAP1B/MAPT/MEF2C/MYADM/MYOC/NDNF/NEGR1/NTRK3/PDE5A/RAC3/RAP1A/SHH/SLIT2/SRF/TCF4/TIMP2	52
GO:0048708	astrocyte differentiation	15/994	63/16992	2.5e-06	6.71e-05	4.87e-05	ABL1/BIN1/ID2/IL6ST/LAMB2/LAMC3/LIF/MAPT/NTRK3/PLP1/PLPP3/ROR1/ROR2/SHH/TSPAN2	15
GO:0003208	cardiac ventricle morphogenesis	16/994	71/16992	2.54e-06	6.79e-05	4.92e-05	COL11A1/FOXF1/HAND1/HAND2/MEF2C/RYR2/SFRP2/SMAD7/SOX4/TBX20/TBX5/TGFBR2/TGFBR3/TNNT2/TPM1/ZFPM2	16
GO:0045860	positive regulation of protein kinase activity	54/994	478/16992	2.59e-06	6.9e-05	5e-05	ABL1/ADAM8/ADCY5/ADCY9/AKAP13/ATP2B4/C8orf4/CCNB1/CCND2/CDC6/CDK1/CDKN1A/CENPE/CKS1B/CKS2/CLU/CSPG4/CXCR4/CYR61/DDR2/DUSP5/ECT2/EZH2/FGF10/FGF2/FGFR1/GADD45B/GHR/ILK/IQGAP3/ITGA1/KIF14/LPAR1/LRP8/LRRK2/MAP3K20/MAP3K8/NCKAP1L/NTRK3/PDE5A/PDGFD/PKD1/PRKACB/	54
GO:0045444	fat cell differentiation	30/994	204/16992	2.86e-06	7.58e-05	5.5e-05	ADRB3/CCDC3/CLIP3/E2F1/EGR2/FGF10/ID2/IL6/JDP2/KLF4/LMO3/MMP11/NR4A1/NR4A2/NR4A3/PER2/PTGS2/RGS2/RUNX1T1/SFRP1/SFRP2/SLC2A4/SREBF1/TGFB1I1/TRIB3/VSTM2A/WWTR1/ZBTB16/ZFP36/ZFPM2	30
GO:0048016	inositol phosphate-mediated signaling	11/994	35/16992	2.95e-06	7.77e-05	5.64e-05	AKAP6/ATP2B4/INPP5A/ITPR1/ITPR3/LMCD1/NFATC1/NFATC2/NFATC4/RCAN1/RCAN2	11
GO:0010882	regulation of cardiac muscle contraction by calcium ion signaling	9/994	23/16992	3e-06	7.85e-05	5.69e-05	ANK2/ATP1A2/CACNA1C/CASQ2/DMD/HDAC4/PLN/RYR2/SLC8A1	9
GO:0042542	response to hydrogen peroxide	22/994	125/16992	3.15e-06	8.22e-05	5.96e-05	ABL1/AQP1/BCL2/CDK1/CRYAB/DUSP1/ECT2/EZH2/FOSL1/GNAO1/IL6/JUN/KLF2/KLF4/LRRK2/NR4A3/PCNA/PDGFD/PYCR1/RHOB/SLC8A1/TNFAIP3	22
GO:0014808	release of sequestered calcium ion into cytosol by sarcoplasmic reticulum	10/994	29/16992	3.23e-06	8.34e-05	6.05e-05	AKAP6/ANK2/ATP1A2/CACNA1C/CASQ2/DMD/PDE4D/PLN/RYR2/SLC8A1	10
GO:0071174	mitotic spindle checkpoint	10/994	29/16992	3.23e-06	8.34e-05	6.05e-05	BUB1/BUB1B/CCNB1/CDT1/CENPF/DUSP1/MAD2L1/NDC80/PLK1/TTK	10
GO:0072163	mesonephric epithelium development	19/994	98/16992	3.36e-06	8.56e-05	6.21e-05	ARG2/BCL2/DCHS1/EPCAM/FAT4/FGF2/FGFR1/ILK/KIF26B/MYC/PBX1/PKD1/PTCH1/SFRP1/SHH/SLIT2/SMAD7/SPRY1/TCF21	19
GO:0072164	mesonephric tubule development	19/994	98/16992	3.36e-06	8.56e-05	6.21e-05	ARG2/BCL2/DCHS1/EPCAM/FAT4/FGF2/FGFR1/ILK/KIF26B/MYC/PBX1/PKD1/PTCH1/SFRP1/SHH/SLIT2/SMAD7/SPRY1/TCF21	19
GO:0051302	regulation of cell division	23/994	135/16992	3.37e-06	8.57e-05	6.21e-05	ASPM/AURKA/AURKB/CDC6/CIT/ECT2/FGF2/FGF7/KIF14/KIF18B/KIF23/MDK/MYC/ORC6/PDGFD/PTCH1/RACGAP1/SFRP2/SHH/SOX17/SVIL/TGFB3/VEGFD	23
GO:0010881	regulation of cardiac muscle contraction by regulation of the release of sequestered calcium ion	8/994	18/16992	3.45e-06	8.66e-05	6.28e-05	ANK2/ATP1A2/CACNA1C/CASQ2/DMD/PLN/RYR2/SLC8A1	8
GO:0048557	embryonic digestive tract morphogenesis	8/994	18/16992	3.45e-06	8.66e-05	6.28e-05	FGF10/FOXF1/ID2/PDGFRA/PITX2/RBPMS2/SHH/TCF21	8
GO:0045787	positive regulation of cell cycle	42/994	341/16992	4e-06	9.97e-05	7.23e-05	ABL1/AURKA/AURKB/BTG2/CCNB1/CCND2/CDC45/CDC6/CDCA5/CDK1/CDKN1A/CDT1/CIT/CKS1B/CKS2/CTGF/DLGAP5/E2F1/ECT2/FEN1/FGF10/FGFR1/FOSL1/GATA6/GTSE1/ID2/KIF14/KIF23/MAD2L1/NDC80/NR4A3/NUSAP1/PBX1/PCNA/PKD1/RACGAP1/RANBP3L/RCC2/RGCC/SOX4/SVIL/UBE2C	42
GO:0022604	regulation of cell morphogenesis	49/994	424/16992	4.01e-06	9.97e-05	7.23e-05	ABL1/ADGRB3/BVES/CCL2/CDC42EP3/CORO1C/CPNE6/CXCL12/DLC1/DPYSL2/EPHA7/EPHB2/FERMT2/FLNA/FYN/IL6/ILK/ITGA7/KANK1/LPAR1/LRP8/LRRK2/MAP1B/MAPT/MYADM/MYOC/NFATC4/NTRK3/OLFM1/OSTN/PALM/PARVA/PLEKHO1/PLXNA1/RAC3/RCC2/RHOJ/SDC2/SEMA3E/SEMA3G/SH3D19/SHROOM3/SLIT2/	49
GO:0007163	establishment or maintenance of cell polarity	26/994	166/16992	4.03e-06	9.97e-05	7.23e-05	AMOTL1/AQP1/CAP2/CENPA/CLIC4/FGF10/FOXF1/FSCN1/GSN/ILK/JAM3/KANK1/KIF26B/KIF2C/MAP1B/MELK/MPP7/NCKAP1L/NDC80/PARVA/PKD1/SHH/SPAG5/SPRY1/UST/WEE1	26
GO:0014743	regulation of muscle hypertrophy	12/994	43/16992	4.26e-06	0.000104922	7.61e-05	AKAP13/AKAP6/ATP2B4/ERRFI1/HAND2/IGFBP5/IL6ST/LMCD1/NR4A3/PDE5A/RGS2/TRIM63	12
GO:0061337	cardiac conduction	23/994	137/16992	4.36e-06	0.000107007	7.76e-05	ABCC9/ANK2/ATP1A2/ATP2B4/CACNA1C/CACNA2D1/CACNB2/CACNB4/CASQ2/DMPK/FLNA/FXYD6/ITPR1/ITPR3/KCND3/KCNK3/NPR1/PDE4D/PLN/RYR2/RYR3/SCN4B/SLC8A1	23
GO:0048638	regulation of developmental growth	37/994	285/16992	4.42e-06	0.000107808	7.82e-05	ABL1/ACACB/ADRB3/AGRN/AKAP6/AR/BCL2/CCNB1/CDK1/CPNE6/CXCL12/DPYSL2/EPHA7/FGF2/FGFR1/GATA6/GHR/ILK/LATS2/MAP1B/MAPT/MEF2C/NTRK3/OLFM1/OSTN/PLXNA1/PTCH1/SEMA3G/SFRP1/SFRP2/SPG20/SRF/TBX20/TBX5/TGFBR2/TGFBR3/ZFPM2	37
GO:0010717	regulation of epithelial to mesenchymal transition	16/994	74/16992	4.52e-06	0.00010854	7.87e-05	BMP5/DACT3/EPHA3/EZH2/GLIPR2/OLFM1/PHLDB2/RGCC/SFRP1/SFRP2/SMAD7/TBX5/TGFB1I1/TGFB3/TGFBR2/WWTR1	16
GO:0097553	calcium ion transmembrane import into cytosol	20/994	109/16992	4.54e-06	0.00010854	7.87e-05	ABL1/AKAP6/ANK2/ATP1A2/ATP2B4/BDKRB1/CACNA1C/CACNA2D1/CASQ2/DMD/FGF2/FYN/ITPR1/ITPR3/JPH2/PDE4D/PLN/RYR2/RYR3/SLC8A1	20
GO:1902656	calcium ion import into cytosol	20/994	109/16992	4.54e-06	0.00010854	7.87e-05	ABL1/AKAP6/ANK2/ATP1A2/ATP2B4/BDKRB1/CACNA1C/CACNA2D1/CASQ2/DMD/FGF2/FYN/ITPR1/ITPR3/JPH2/PDE4D/PLN/RYR2/RYR3/SLC8A1	20
GO:0010975	regulation of neuron projection development	47/994	402/16992	4.59e-06	0.00010854	7.87e-05	ABL1/ADGRB3/APBB1/BMP5/CDC20/CNTN1/CPEB1/CPNE6/CXCL12/DPYSL2/DPYSL3/EPHA3/EPHA7/EPHB2/EZH2/FGFR1/FYN/IL6/ILK/KANK1/KLF4/LPAR1/LRP8/LRRK2/MAP1B/MAPT/MEF2C/NCS1/NDNF/NEGR1/NFATC4/NR2F1/NTRK3/OLFM1/OSTN/PLXNA1/PMP22/RAP1A/SDC2/SEMA3G/SFRP1/SFRP2/SLIT2/SPG20/	47
GO:0045841	negative regulation of mitotic metaphase/anaphase transition	10/994	30/16992	4.6e-06	0.00010854	7.87e-05	BUB1/BUB1B/CCNB1/CDT1/CENPF/DUSP1/MAD2L1/NDC80/PLK1/TTK	10
GO:1903514	calcium ion transport from endoplasmic reticulum to cytosol	10/994	30/16992	4.6e-06	0.00010854	7.87e-05	AKAP6/ANK2/ATP1A2/CACNA1C/CASQ2/DMD/PDE4D/PLN/RYR2/SLC8A1	10
GO:2000816	negative regulation of mitotic sister chromatid separation	10/994	30/16992	4.6e-06	0.00010854	7.87e-05	BUB1/BUB1B/CCNB1/CDT1/CENPF/DUSP1/MAD2L1/NDC80/PLK1/TTK	10
GO:0055024	regulation of cardiac muscle tissue development	15/994	66/16992	4.65e-06	0.000109283	7.92e-05	AKAP6/CCNB1/CDK1/FGF2/FGFR1/FZD7/GATA6/JPH2/MEF2C/MYOCD/TBX20/TBX5/TGFBR2/TGFBR3/ZFPM2	15
GO:0090066	regulation of anatomical structure size	51/994	451/16992	4.78e-06	0.000111728	8.1e-05	ABL1/ACTA2/ACTN2/ADRB3/AGTR1/AKT3/AQP1/ATP1A2/BDKRB2/CDC42EP3/CFL2/CHRM3/CIT/CSF3/CXCL12/DPYSL2/DSTN/EDNRA/EDNRB/EPHA7/EPHX2/GSN/ILK/IQGAP3/ITGA1/KANK1/KCNMA1/KCNMB1/LMOD1/LMOD3/LRRK2/MAP1B/MAPT/MYADM/NCKAP1L/NPR1/NTRK3/OLFM1/P2RX1/PER2/PLXNA1/PPP1R15A/PR	51
GO:0006816	calcium ion transport	45/994	379/16992	4.87e-06	0.000112879	8.18e-05	ABL1/AHNAK/AKAP6/ANK2/ANXA6/ATP1A2/ATP2B4/BCL2/BDKRB1/CACNA1C/CACNA1H/CACNA2D1/CACNB2/CACNB4/CAMK2A/CASQ2/CCL2/CTGF/CXCL12/DENND5A/DMD/FGF2/FYN/GNAO1/ITPR1/ITPR3/JPH2/MYLK/NCS1/P2RX1/PDE2A/PDE4B/PDE4D/PKD1/PLN/PRKCB/PTGS2/RAMP1/RYR2/RYR3/SLC24A3/SLC25A23/	45
GO:0042391	regulation of membrane potential	45/994	379/16992	4.87e-06	0.000112879	8.18e-05	ABL1/ACTN2/AKAP6/ANK2/ATP1A2/BCL2/BVES/CACNA1C/CACNA1H/CACNA2D1/CACNB2/CACNB4/CASQ2/DCN/DMD/DMPK/FHL1/FLNA/GRIN2D/IFI6/IGSF9B/IL6/JUN/KCNB1/KCND3/KCNMA1/LRRK2/MAPT/MEF2C/MYOC/NRXN1/P2RX1/PID1/PLN/PYCR1/RYR2/SCN11A/SCN4B/SCN7A/SLC1A6/SLC26A6/SLC8A1/SLMAP/S	45
GO:0060420	regulation of heart growth	13/994	51/16992	5.16e-06	0.000119094	8.63e-05	ACACB/AKAP6/CCNB1/CDK1/FGF2/FGFR1/GATA6/MEF2C/TBX20/TBX5/TGFBR2/TGFBR3/ZFPM2	13
GO:0060401	cytosolic calcium ion transport	23/994	139/16992	5.61e-06	0.000127761	9.26e-05	ABL1/AKAP6/ANK2/ATP1A2/ATP2B4/BCL2/BDKRB1/CACNA1C/CACNA2D1/CASQ2/CTGF/DMD/FGF2/FYN/ITPR1/ITPR3/JPH2/PDE4D/PLN/RYR2/RYR3/SLC25A23/SLC8A1	23
GO:0030239	myofibril assembly	14/994	59/16992	5.62e-06	0.000127761	9.26e-05	ACTC1/ACTN2/AKAP13/CASQ2/CFL2/KLHL41/MEF2C/MYH11/MYH3/MYOM1/PDGFRA/SRF/TMOD1/TPM1	14
GO:0055013	cardiac muscle cell development	14/994	59/16992	5.62e-06	0.000127761	9.26e-05	ACTC1/ACTN2/AKAP6/BVES/CCNB1/CDK1/MYH11/NEXN/PDGFRA/PITX2/SGCB/SLC8A1/SORBS2/SRF	14
GO:0007369	gastrulation	27/994	180/16992	6.09e-06	0.00013801	0.000100056	COL11A1/COL7A1/DUSP1/DUSP2/DUSP5/ETS2/FGFR1/FOXF1/FZD7/GATA6/HAND1/INHBA/ITGA5/ITGA7/ITGA8/KLF4/MYADM/NR4A3/PHLDB2/PLPP3/SFRP1/SFRP2/SOX17/SRF/TBX20/TGFBR2/WLS	27
GO:1902100	negative regulation of metaphase/anaphase transition of cell cycle	10/994	31/16992	6.43e-06	0.000144403	0.000104691	BUB1/BUB1B/CCNB1/CDT1/CENPF/DUSP1/MAD2L1/NDC80/PLK1/TTK	10
GO:1905819	negative regulation of chromosome separation	10/994	31/16992	6.43e-06	0.000144403	0.000104691	BUB1/BUB1B/CCNB1/CDT1/CENPF/DUSP1/MAD2L1/NDC80/PLK1/TTK	10
GO:0048146	positive regulation of fibroblast proliferation	13/994	52/16992	6.52e-06	0.000145684	0.00010562	AQP1/CCNA2/CCNB1/CDC6/CDKN1A/DDR2/E2F1/ESR1/FGF10/JUN/MYC/PDGFD/PDGFRA	13
GO:0046622	positive regulation of organ growth	12/994	45/16992	7.16e-06	0.000159306	0.000115496	ACACB/AKAP6/CCNB1/CDK1/FGF2/FGFR1/GATA6/MEF2C/TBX20/TBX5/TGFBR3/ZFPM2	12
GO:0030010	establishment of cell polarity	19/994	103/16992	7.21e-06	0.000159656	0.00011575	AMOTL1/CENPA/FGF10/FOXF1/FSCN1/GSN/JAM3/KANK1/KIF26B/MAP1B/MELK/MPP7/NDC80/PKD1/SHH/SPAG5/SPRY1/UST/WEE1	19
GO:0007568	aging	36/994	280/16992	7.39e-06	0.000162993	0.000118169	ABL1/ADRB3/AURKB/BCL2/C2orf40/CCL2/CDK1/CDKN1A/CRYAB/CTGF/DCN/EDNRB/FOS/FOXM1/GNAO1/GSN/H2AFX/ID2/IGFBP5/IL6/ILK/JUN/JUND/KCNMB1/LRRK2/PDE4D/PRELP/PTGS2/RAD54L/SREBF1/SRF/TACR3/TGFB3/TGFBR2/TIMP2/TYMS	36
GO:0051216	cartilage development	27/994	182/16992	7.52e-06	0.000165043	0.000119655	BMP5/COL10A1/COL11A1/CSGALNACT1/CTGF/CYR61/FGF2/FGFR1/HAND1/HAND2/MEF2C/MEF2D/MGP/NFIB/PITX1/PKD1/PKDCC/ROR2/SFRP2/SRF/STC1/TGFBR2/THRA/TYMS/WNT9A/ZBTB16/ZEB1	27
GO:0021700	developmental maturation	33/994	247/16992	7.8e-06	0.000170274	0.000123448	ADGRB3/AGRN/AURKA/BCL2/CCNB1/CDC20/CDH3/CDKN1A/DCHS1/EDNRB/FAT4/FGFR1/ID2/KIF14/KLF2/LGI4/LRRK2/MYOC/NFASC/NFATC4/NFIA/NR4A2/NRXN1/PABPC1L/PALM/PLP1/RAC3/RECK/RND1/S1PR1/SLC26A6/TRIP13/TYMS	33
GO:0021537	telencephalon development	32/994	236/16992	7.82e-06	0.000170274	0.000123448	AQP1/ASPM/ATP2B4/BTG2/C16orf45/CDON/CXCL12/DIXDC1/EPHB2/EZH2/FAT4/FLNA/FOXP2/H2AFX/ID2/INHBA/KIF14/LPAR1/LRP8/LRRK2/MDK/MEF2C/NFIB/NR4A3/SHH/SLC8A1/SLIT2/SRF/TACC1/TACC2/TACC3/ZEB2	32
GO:0071277	cellular response to calcium ion	13/994	53/16992	8.18e-06	0.000176511	0.000127969	CLIC4/CPNE6/ECT2/FOS/FOSB/ITPKB/JUN/JUNB/JUND/MEF2C/RASGRP2/RYR3/SLC25A23	13
GO:0090307	mitotic spindle assembly	13/994	53/16992	8.18e-06	0.000176511	0.000127969	AURKB/BIRC5/CDC20/FLNA/KIF11/KIF23/KIF4A/KIFC1/MYBL2/NEK2/PLK1/RACGAP1/TPX2	13
GO:0033048	negative regulation of mitotic sister chromatid segregation	10/994	32/16992	8.87e-06	0.000190573	0.000138164	BUB1/BUB1B/CCNB1/CDT1/CENPF/DUSP1/MAD2L1/NDC80/PLK1/TTK	10
GO:0018209	peptidyl-serine modification	37/994	294/16992	9.08e-06	0.000194278	0.00014085	AKT3/ATP2B4/AURKA/AURKB/BCL2/BDKRB2/CAMK2A/CCNB1/CDK1/CNKSR3/CSF3/DCLK1/DCN/DMD/DMPK/HIPK3/IL6/ILK/LATS2/LIF/LRRK2/NDNF/NTRK3/PDE4D/PKD1/PLK1/PPP1R15A/PRKAA2/PRKCB/PTGS2/RPS6KA5/SBK1/SFRP2/SGK1/SMAD7/TGFBR2/TTK	37
GO:0055021	regulation of cardiac muscle tissue growth	12/994	46/16992	9.18e-06	0.000195498	0.000141735	AKAP6/CCNB1/CDK1/FGF2/FGFR1/GATA6/MEF2C/TBX20/TBX5/TGFBR2/TGFBR3/ZFPM2	12
GO:0030049	muscle filament sliding	11/994	39/16992	9.56e-06	0.000201971	0.000146428	ACTC1/ACTN2/DES/DMD/MYH2/MYH3/TMOD1/TNNT1/TNNT2/TPM1/TPM2	11
GO:0033275	actin-myosin filament sliding	11/994	39/16992	9.56e-06	0.000201971	0.000146428	ACTC1/ACTN2/DES/DMD/MYH2/MYH3/TMOD1/TNNT1/TNNT2/TPM1/TPM2	11
GO:0051225	spindle assembly	17/994	87/16992	9.76e-06	0.000205263	0.000148814	ASPM/AURKA/AURKB/BIRC5/CDC20/FLNA/KIF11/KIF23/KIF4A/KIFC1/MYBL2/NEK2/PLK1/RACGAP1/RCC1/STARD9/TPX2	17
GO:0034330	cell junction organization	33/994	250/16992	1.01e-05	0.000211341	0.000153221	ACTN2/ANK2/ARHGAP6/BCL2/CDH3/CLDN5/CORO1C/DLC1/ECT2/EPHA3/FERMT2/FLNA/FLNC/FSCN1/ILK/ITGA5/LIMS2/MPP7/MYOC/NFASC/PHLDB2/RAP1A/RASSF8/RCC2/SFRP1/SMAD7/SORBS1/SRF/TGFB3/THBS1/TLN1/TNS1/VCL	33
GO:0090092	regulation of transmembrane receptor protein serine/threonine kinase signaling pathway	29/994	207/16992	1.09e-05	0.000228271	0.000165495	ABL1/BMP5/CHRDL1/CYR61/FBN1/FGF10/GATA6/GREM2/ILK/INHBA/ITGA8/LTBP4/MYOCD/RBPMS/RBPMS2/SFRP1/SFRP2/SHH/SMAD7/SPG20/TBX20/TGFB1I1/TGFB3/TGFBR2/TGFBR3/THBS1/TTK/WWTR1/ZEB1	29
GO:0051147	regulation of muscle cell differentiation	25/994	165/16992	1.11e-05	0.000231479	0.00016782	ABL1/AKAP13/AKAP6/BCL2/BOC/CDON/DMPK/EHD2/EZH2/FOXF1/FZD7/HDAC4/ILK/KLHL41/MEF2C/MYOCD/NFATC2/PRDM6/RANBP3L/RBPMS2/SHH/SIK1/SRF/THRA/ZEB1	25
GO:0048588	developmental cell growth	27/994	186/16992	1.13e-05	0.000234029	0.00016967	ABL1/AKAP6/AURKA/CPNE6/CXCL12/DCLK1/DPYSL2/EPHA7/ILK/LAMB2/MAP1B/MAPT/NDN/NRP2/NTRK3/OLFM1/OSTN/PLXNA1/SEMA3G/SLIT2/SLIT3/SORBS2/SPG20/SRF/TGFBR2/VCL/ZEB2	27
GO:0001657	ureteric bud development	18/994	97/16992	1.14e-05	0.000235855	0.000170993	ARG2/BCL2/DCHS1/EPCAM/FAT4/FGF2/FGFR1/ILK/KIF26B/MYC/PBX1/PTCH1/SFRP1/SHH/SLIT2/SMAD7/SPRY1/TCF21	18
GO:0010463	mesenchymal cell proliferation	12/994	47/16992	1.17e-05	0.000239532	0.000173659	DCHS1/FAT4/FGF7/FGFR1/FOXF1/FOXP2/HAND2/MYC/NFIB/SHH/TGFBR2/ZEB1	12
GO:0070296	sarcoplasmic reticulum calcium ion transport	10/994	33/16992	1.21e-05	0.000246528	0.000178731	AKAP6/ANK2/ATP1A2/CACNA1C/CASQ2/DMD/PDE4D/PLN/RYR2/SLC8A1	10
GO:0014888	striated muscle adaptation	11/994	40/16992	1.25e-05	0.000254338	0.000184393	ATP2B4/ERRFI1/EZH2/GATA6/GSN/HDAC4/IGFBP5/MEF2C/MYOC/TNNT1/TRIM63	11
GO:0060411	cardiac septum morphogenesis	14/994	63/16992	1.27e-05	0.000257139	0.000186424	BMP5/CYR61/GATA6/HAND1/ID2/PARVA/PITX2/SMAD7/SOX4/TBX20/TBX5/TGFBR2/TGFBR3/ZFPM2	14
GO:0044839	cell cycle G2/M phase transition	32/994	242/16992	1.32e-05	0.000266469	0.000193188	AURKA/CCNA2/CCNB1/CCNB2/CDK1/CDKN1A/CENPF/CIT/FANCI/FBXL7/FHL1/FOXM1/FOXN3/GTSE1/HMMR/KIF14/MELK/NEK2/NES/PBX1/PHLDA1/PKMYT1/PLK1/PPP1R12A/PPP1R12B/PRKAR2B/RCC2/SKP2/TPD52L1/TPX2/TUBA1A/WEE1	32
GO:0003231	cardiac ventricle development	20/994	117/16992	1.37e-05	0.000276082	0.000200157	COL11A1/CYR61/FOXF1/HAND1/HAND2/ID2/MEF2C/MYOCD/PITX2/RYR2/SFRP2/SMAD7/SOX4/TBX20/TBX5/TGFBR2/TGFBR3/TNNT2/TPM1/ZFPM2	20
GO:0051988	regulation of attachment of spindle microtubules to kinetochore	6/994	11/16992	1.41e-05	0.000283282	0.000205377	CCNB1/ECT2/NEK2/RACGAP1/RCC2/SPAG5	6
GO:0018105	peptidyl-serine phosphorylation	35/994	277/16992	1.44e-05	0.000287874	0.000208707	AKT3/ATP2B4/AURKA/AURKB/BCL2/BDKRB2/CAMK2A/CCNB1/CDK1/CNKSR3/CSF3/DCLK1/DMD/DMPK/HIPK3/IL6/ILK/LATS2/LIF/LRRK2/NTRK3/PDE4D/PKD1/PLK1/PPP1R15A/PRKAA2/PRKCB/PTGS2/RPS6KA5/SBK1/SFRP2/SGK1/SMAD7/TGFBR2/TTK	35
GO:0002027	regulation of heart rate	17/994	90/16992	1.56e-05	0.00030946	0.000224356	ANK2/BVES/CACNA1C/CACNA2D1/CACNB2/CASQ2/DMD/KCND3/PDE4D/PLN/POPDC2/RYR2/SCN4B/SLC8A1/SREBF1/TACR3/TPM1	17
GO:1901991	negative regulation of mitotic cell cycle phase transition	28/994	200/16992	1.56e-05	0.00030946	0.000224356	AURKA/BCL2/BTG2/BUB1/BUB1B/CCNB1/CDK1/CDKN1A/CDT1/CENPF/DCUN1D3/DUSP1/E2F1/EZH2/FANCI/FBXL7/FHL1/FOXN3/GTSE1/KANK2/MAD2L1/NACC2/NDC80/PCNA/PLK1/RGCC/SOX4/TTK	28
GO:0000086	G2/M transition of mitotic cell cycle	31/994	233/16992	1.58e-05	0.000312337	0.000226442	AURKA/CCNA2/CCNB1/CCNB2/CDK1/CDKN1A/CENPF/CIT/FANCI/FBXL7/FHL1/FOXM1/FOXN3/HMMR/KIF14/MELK/NEK2/NES/PBX1/PHLDA1/PKMYT1/PLK1/PPP1R12A/PPP1R12B/PRKAR2B/RCC2/SKP2/TPD52L1/TPX2/TUBA1A/WEE1	31
GO:0007611	learning or memory	30/994	222/16992	1.59e-05	0.000312765	0.000226752	ADGRB3/ATP1A2/BCHE/BTG2/CCND2/CLDN5/EGR2/EPHB2/FEN1/FOS/FOSL1/FOXP2/FYN/ITGA5/ITGA8/ITPR3/JUN/MAPT/MDK/MEF2C/MEIS2/NRXN1/PJA2/PRKAR2B/PTGS2/SGK1/SRF/SYNPO/TACR2/THRA	30
GO:0010611	regulation of cardiac muscle hypertrophy	11/994	41/16992	1.62e-05	0.000313217	0.00022708	AKAP13/AKAP6/ATP2B4/ERRFI1/HAND2/IL6ST/LMCD1/NR4A3/PDE5A/RGS2/TRIM63	11
GO:0045839	negative regulation of mitotic nuclear division	11/994	41/16992	1.62e-05	0.000313217	0.00022708	BUB1/BUB1B/CCNB1/CDT1/CENPF/DUSP1/MAD2L1/NDC80/PLK1/RGCC/TTK	11
GO:0060402	calcium ion transport into cytosol	21/994	128/16992	1.62e-05	0.000313217	0.00022708	ABL1/AKAP6/ANK2/ATP1A2/ATP2B4/BCL2/BDKRB1/CACNA1C/CACNA2D1/CASQ2/DMD/FGF2/FYN/ITPR1/ITPR3/JPH2/PDE4D/PLN/RYR2/RYR3/SLC8A1	21
GO:0033046	negative regulation of sister chromatid segregation	10/994	34/16992	1.62e-05	0.000313217	0.00022708	BUB1/BUB1B/CCNB1/CDT1/CENPF/DUSP1/MAD2L1/NDC80/PLK1/TTK	10
GO:0007409	axonogenesis	47/994	422/16992	1.67e-05	0.000321022	0.000232738	ABL1/ADARB1/APBB1/BCL2/BOC/CELSR3/CXCL12/DCLK1/DOK6/DPYSL2/EGR2/EPHA7/EPHB2/ETV4/FYN/GFRA1/ILK/LAMA2/LAMB2/MAP1B/MAPT/MATN2/NCAM1/NDN/NFASC/NFIB/NR4A2/NR4A3/NRP2/NRXN1/NTRK3/OGN/OLFM1/PDLIM7/PLPPR4/PLXNA1/RPS6KA5/SEMA3G/SHH/SLIT2/SLIT3/SPG20/SRF/STMN1/UST	47
GO:0045667	regulation of osteoblast differentiation	19/994	109/16992	1.68e-05	0.000322527	0.00023383	CYR61/DDR2/HAND2/HDAC4/ID2/IGFBP5/IL6/IL6ST/ILK/JUND/MEF2C/OSTN/PDLIM7/PTCH1/RANBP3L/SFRP1/SFRP2/TMEM119/ZHX3	19
GO:0060419	heart growth	15/994	73/16992	1.72e-05	0.000328057	0.000237839	ACACB/AKAP6/CCNB1/CDK1/FGF2/FGFR1/GATA6/MEF2C/S1PR1/SORBS2/TBX20/TBX5/TGFBR2/TGFBR3/ZFPM2	15
GO:0048675	axon extension	18/994	100/16992	1.77e-05	0.000337133	0.000244419	ABL1/CXCL12/DCLK1/DPYSL2/ILK/LAMB2/MAP1B/MAPT/NDN/NRP2/NTRK3/OLFM1/PLXNA1/SEMA3G/SLIT2/SLIT3/SRF/VCL	18
GO:0034446	substrate adhesion-dependent cell spreading	16/994	82/16992	1.8e-05	0.000342453	0.000248276	ABL1/BVES/CORO1C/FERMT2/FLNA/FZD7/ILK/ITGA8/KANK1/KIF14/MYADM/MYOC/PARVA/RAC3/RCC2/UNC13D	16
GO:0072006	nephron development	22/994	139/16992	1.84e-05	0.000346631	0.000251305	ACTA2/BCL2/CD34/DCHS1/EGR1/FAT4/FGF2/ILK/KIF26B/LAMB2/LIF/MEF2C/MYC/PBX1/PDGFD/PDGFRA/PECAM1/PKD1/PTCH1/SHH/TCF21/WWTR1	22
GO:1904018	positive regulation of vasculature development	22/994	139/16992	1.84e-05	0.000346631	0.000251305	AQP1/C3/CD34/CMA1/EGR1/FGF2/GATA6/HSPB6/ITGA5/MYOCD/PDGFD/PRKCB/PTGIS/PTGS2/RAP1A/RHOB/SFRP2/TGFBR2/THBS1/TMEM100/TNFSF12/VEGFD	22
GO:0048546	digestive tract morphogenesis	12/994	49/16992	1.85e-05	0.000346931	0.000251523	BCL2/FGF10/FOXF1/ID2/PDGFRA/PITX2/RBPMS2/SFRP1/SFRP2/SHH/SOX17/TCF21	12
GO:0086012	membrane depolarization during cardiac muscle cell action potential	8/994	22/16992	2.04e-05	0.000380947	0.000276184	ANK2/ATP1A2/CACNA1C/CACNA2D1/CACNB2/SCN4B/SLC8A1/SLMAP	8
GO:0090287	regulation of cellular response to growth factor stimulus	31/994	236/16992	2.05e-05	0.000380947	0.000276184	ABL1/ADGRA2/CHRDL1/CYR61/DCN/FBN1/FGF10/FGF2/FGFR1/GATA6/GREM2/HHIP/ILK/ITGA5/ITGA8/LTBP4/MYOCD/PRKCB/RBPMS2/SFRP1/SFRP2/SLIT2/SMAD7/SPG20/SPRY1/TGFB1I1/TGFB3/TGFBR2/TGFBR3/THBS1/ZEB1	31
GO:0060993	kidney morphogenesis	17/994	92/16992	2.11e-05	0.000391184	0.000283606	BCL2/DCHS1/FAT4/FGF10/FGF2/ILK/KIF26B/LIF/LRRK2/MYC/PBX1/PKD1/PTCH1/SHH/SOX4/TCF21/WWTR1	17
GO:0000079	regulation of cyclin-dependent protein serine/threonine kinase activity	16/994	83/16992	2.12e-05	0.000391184	0.000283606	CCNA2/CCNB1/CCND2/CDC6/CDKN1A/CKS1B/CKS2/FGF10/LATS2/MYOCD/PKD1/PKMYT1/PLK1/RGCC/SERTAD1/TNFAIP3	16
GO:0051985	negative regulation of chromosome segregation	10/994	35/16992	2.15e-05	0.000395865	0.000286999	BUB1/BUB1B/CCNB1/CDT1/CENPF/DUSP1/MAD2L1/NDC80/PLK1/TTK	10
GO:0050679	positive regulation of epithelial cell proliferation	24/994	161/16992	2.19e-05	0.000401525	0.000291102	AR/BMP5/CCL2/CDH3/CXCL12/EGR3/FGF10/FGF2/FGF7/FOXP2/FZD7/IL6/IQGAP3/JUN/MYC/NME1/NR4A1/NR4A3/NRP2/SFRP1/SHH/TNFAIP3/TNFSF12/VEGFD	24
GO:0045765	regulation of angiogenesis	29/994	215/16992	2.27e-05	0.000415433	0.000301186	ADGRA2/ADGRB3/AQP1/C3/CCL2/CD34/CMA1/DCN/FGF2/GATA6/HSPB6/IL6/ITGA5/KLF4/NPR1/PRKCB/PTGIS/PTGS2/RGCC/RHOB/SEMA3E/SFRP1/SFRP2/STARD13/TGFBR2/THBS1/TNFAIP3/TNFSF12/VEGFD	29
GO:0051310	metaphase plate congression	12/994	50/16992	2.3e-05	0.000419883	0.000304412	CCNB1/CDCA5/CDCA8/CDT1/CENPE/CENPF/GEM/KIF14/KIF22/KIF2C/KIFC1/NDC80	12
GO:0086003	cardiac muscle cell contraction	13/994	58/16992	2.34e-05	0.000424075	0.000307451	ANK2/ATP1A2/CACNA1C/CACNA2D1/CACNB2/FLNA/KCND3/PDE4B/PDE4D/PLN/RYR2/SCN4B/STC1	13
GO:0051924	regulation of calcium ion transport	28/994	205/16992	2.48e-05	0.00044864	0.000325261	ABL1/AHNAK/AKAP6/ANK2/ATP1A2/BCL2/BDKRB1/CACNA1C/CACNA2D1/CACNB2/CACNB4/CAMK2A/CASQ2/CCL2/CXCL12/DMD/FYN/GNAO1/JPH2/MYLK/P2RX1/PDE4B/PDE4D/PLN/PTGS2/RYR2/SLC8A1/STC1	28
GO:0006874	cellular calcium ion homeostasis	44/994	392/16992	2.55e-05	0.000458675	0.000332536	ABL1/ADCY5/AGTR1/AKAP6/ANK2/ANXA6/ATP1A2/ATP2B4/BCL2/BDKRB1/BDKRB2/CACNA1C/CACNA2D1/CASQ2/CCL14/CCL2/CD55/CXCL12/CXCR4/DMD/DMPK/EDNRA/EDNRB/EPHX2/ESR1/FGF2/FYN/ITPR1/ITPR3/JPH2/KCNK3/LPAR1/PDE4D/PDGFRA/PKD1/PLN/PRKCB/RYR2/RYR3/S1PR1/SLC24A3/SLC25A23/SLC8A	44
GO:0042551	neuron maturation	11/994	43/16992	2.64e-05	0.000474922	0.000344315	ADGRB3/AGRN/BCL2/EDNRB/LGI4/LRRK2/MYOC/NFASC/NR4A2/RAC3/RND1	11
GO:0055119	relaxation of cardiac muscle	7/994	17/16992	2.66e-05	0.000475469	0.000344712	ATP1A2/PDE4B/PDE4D/PDE5A/PLN/RGS2/SLC8A1	7
GO:0055017	cardiac muscle tissue growth	14/994	67/16992	2.67e-05	0.000475651	0.000344843	AKAP6/CCNB1/CDK1/FGF2/FGFR1/GATA6/MEF2C/S1PR1/SORBS2/TBX20/TBX5/TGFBR2/TGFBR3/ZFPM2	14
GO:0003207	cardiac chamber formation	6/994	12/16992	2.69e-05	0.000477581	0.000346243	HAND1/HAND2/MEF2C/SOX4/TBX20/TBX5	6
GO:0045930	negative regulation of mitotic cell cycle	34/994	274/16992	2.78e-05	0.000492607	0.000357136	ABL1/AURKA/BCL2/BTG2/BUB1/BUB1B/CCNB1/CDK1/CDKN1A/CDT1/CENPF/DCUN1D3/DUSP1/E2F1/EZH2/FANCI/FBXL7/FHL1/FOXN3/GTSE1/KANK2/KNTC1/MAD2L1/NACC2/NDC80/PCNA/PLK1/RGCC/SOX4/TIMP2/TOP2A/TTK/WNT9A/ZWINT	34
GO:0000281	mitotic cytokinesis	10/994	36/16992	2.82e-05	0.000496129	0.00035969	CENPA/CEP55/CIT/KIF20A/KIF23/KIF4A/NUSAP1/PLK1/RACGAP1/STMN1	10
GO:0051591	response to cAMP	17/994	94/16992	2.82e-05	0.000496129	0.00035969	AKAP6/AQP1/DUSP1/FOS/FOSB/FOSL1/IGFBP5/JUN/JUNB/JUND/PER1/PLA2G5/RAP1A/SLC26A6/SLC8A1/SREBF1/STC1	17
GO:0051784	negative regulation of nuclear division	12/994	51/16992	2.86e-05	0.000500198	0.00036264	BUB1/BUB1B/CCNB1/CDT1/CENPF/DUSP1/LIF/MAD2L1/NDC80/PLK1/RGCC/TTK	12
GO:1900542	regulation of purine nucleotide metabolic process	29/994	218/16992	2.95e-05	0.000515501	0.000373734	ADCY5/ADCY9/ADGRD1/ADRB3/AKAP12/AKAP6/CAP2/CCNB1/CDK1/EDNRA/EDNRB/GNAL/GUCA1C/HDAC4/LPAR1/NPR1/OSTN/PALM/PDE2A/PDE4D/PDE5A/PID1/PRKAA2/PRKAG2/RAMP1/SLC25A23/THBS1/TIMP2/VIPR2	29
GO:0051282	regulation of sequestering of calcium ion	18/994	104/16992	3.07e-05	0.000534517	0.000387521	ABL1/AKAP6/ANK2/ATP1A2/BDKRB1/CACNA1C/CASQ2/DMD/FGF2/ITPR1/ITPR3/JPH2/PDE4D/PLN/RYR2/RYR3/SLC25A23/SLC8A1	18
GO:0007204	positive regulation of cytosolic calcium ion concentration	33/994	264/16992	3.13e-05	0.000542797	0.000393524	ABL1/ADCY5/AGTR1/AKAP6/ANK2/ATP1A2/ATP2B4/BCL2/BDKRB1/BDKRB2/CACNA1C/CACNA2D1/CASQ2/CD55/CXCR4/DMD/EDNRA/EDNRB/ESR1/FGF2/FYN/ITPR1/ITPR3/JPH2/LPAR1/PDE4D/PDGFRA/PKD1/PLN/RYR2/RYR3/S1PR1/SLC8A1	33
GO:1901988	negative regulation of cell cycle phase transition	28/994	208/16992	3.24e-05	0.000560211	0.000406149	AURKA/BCL2/BTG2/BUB1/BUB1B/CCNB1/CDK1/CDKN1A/CDT1/CENPF/DCUN1D3/DUSP1/E2F1/EZH2/FANCI/FBXL7/FHL1/FOXN3/GTSE1/KANK2/MAD2L1/NACC2/NDC80/PCNA/PLK1/RGCC/SOX4/TTK	28
GO:0060038	cardiac muscle cell proliferation	11/994	44/16992	3.34e-05	0.000573694	0.000415924	CCNB1/CDK1/FGF2/FGFR1/GATA6/MEF2C/TBX20/TBX5/TGFBR2/TGFBR3/ZFPM2	11
GO:0007044	cell-substrate junction assembly	16/994	86/16992	3.35e-05	0.000573694	0.000415924	ACTN2/ARHGAP6/BCL2/CORO1C/DLC1/EPHA3/FERMT2/ITGA5/MYOC/PHLDB2/RCC2/SFRP1/SORBS1/THBS1/TLN1/TNS1	16
GO:1904029	regulation of cyclin-dependent protein kinase activity	16/994	86/16992	3.35e-05	0.000573694	0.000415924	CCNA2/CCNB1/CCND2/CDC6/CDKN1A/CKS1B/CKS2/FGF10/LATS2/MYOCD/PKD1/PKMYT1/PLK1/RGCC/SERTAD1/TNFAIP3	16
GO:0048469	cell maturation	23/994	155/16992	3.47e-05	0.000591603	0.000428908	ADGRB3/AGRN/AURKA/BCL2/CCNB1/CDKN1A/EDNRB/FGFR1/ID2/KIF14/KLF2/LGI4/LRRK2/MYOC/NFASC/NR4A2/PABPC1L/PLP1/RAC3/RND1/SLC26A6/TRIP13/TYMS	23
GO:0071398	cellular response to fatty acid	12/994	52/16992	3.52e-05	0.000597264	0.000433012	CCL2/CCNB1/E2F1/LDLR/NFATC4/PDK4/PID1/PRKAA2/PTGER4/PTGFR/SFRP1/SREBF1	12
GO:0001569	branching involved in blood vessel morphogenesis	9/994	30/16992	3.62e-05	0.000612851	0.000444312	EDNRA/NFATC4/PITX2/SEMA3E/SFRP2/SHH/SRF/TBX20/TGFBR2	9
GO:0002040	sprouting angiogenesis	14/994	69/16992	3.78e-05	0.000635368	0.000460637	ADGRA2/EGR3/ESM1/FGF2/ITGA5/KLF4/NR4A1/PARVA/PTGS2/SEMA3E/SLIT2/SRF/STARD13/THBS1	14
GO:0003151	outflow tract morphogenesis	14/994	69/16992	3.78e-05	0.000635368	0.000460637	CLDN5/GATA6/HAND2/ILK/JUN/MEF2C/PARVA/PITX2/SFRP2/SOX17/TBX20/TGFBR2/TGFBR3/ZFPM2	14
GO:0048644	muscle organ morphogenesis	15/994	78/16992	3.92e-05	0.000654477	0.000474491	ACTC1/ADARB1/COL11A1/HAND1/LIF/MYLK/PITX2/RYR2/S1PR1/SMAD7/TBX20/TGFBR3/TNNT2/TPM1/ZFPM2	15
GO:0070542	response to fatty acid	15/994	78/16992	3.92e-05	0.000654477	0.000474491	CCL2/CCNB1/CTGF/E2F1/LDLR/NFATC4/PDK4/PID1/PRKAA2/PTGER4/PTGFR/PTGS2/SFRP1/SREBF1/TGFBR3	15
GO:0044236	multicellular organism metabolic process	21/994	136/16992	4.13e-05	0.000684146	0.000496001	ADRB3/CCL2/COL10A1/COL11A1/COL19A1/COL4A6/COL7A1/CTGF/CYGB/ERRFI1/GHR/IL6/MFAP4/MMP11/MMP27/RAP1A/RGCC/TGFB3/TIPARP/TNS2/TNXB	21
GO:0006027	glycosaminoglycan catabolic process	13/994	61/16992	4.13e-05	0.000684146	0.000496001	AGRN/CSPG4/DCN/FGF2/GPC6/HMMR/HPSE2/HSPG2/OGN/OMD/PRELP/SDC2/SDC3	13
GO:0006875	cellular metal ion homeostasis	51/994	488/16992	4.14e-05	0.000684146	0.000496001	ABL1/ADCY5/AGTR1/AKAP6/ANK2/ANXA6/ATP1A2/ATP2B4/BCL2/BDKRB1/BDKRB2/C7/CACNA1C/CACNA2D1/CASQ2/CCL14/CCL2/CD55/CXCL12/CXCR4/CYBRD1/DMD/DMPK/EDNRA/EDNRB/EPHX2/ESR1/FGF2/FYN/HEPH/ITPR1/ITPR3/JPH2/KCNK3/KCNMA1/LPAR1/MYC/PDE4D/PDGFRA/PKD1/PLN/PRKCB/RYR2/RYR3/S1	51
GO:0003171	atrioventricular valve development	8/994	24/16992	4.23e-05	0.000694259	0.000503333	CYR61/DCHS1/OLFM1/PITX2/SOX4/TBX20/TBX5/TGFBR2	8
GO:0033173	calcineurin-NFAT signaling cascade	8/994	24/16992	4.23e-05	0.000694259	0.000503333	AKAP6/ATP2B4/LMCD1/NFATC1/NFATC2/NFATC4/RCAN1/RCAN2	8
GO:0034614	cellular response to reactive oxygen species	22/994	147/16992	4.47e-05	0.000728993	0.000528515	ABL1/AQP1/CCNA2/CDK1/ECT2/EZH2/FBLN5/FOS/IL6/JUN/KLF2/KLF4/LRRK2/NR4A3/PCNA/PDGFD/PDGFRA/PYCR1/RHOB/SOD3/TNFAIP3/TPM1	22
GO:0071248	cellular response to metal ion	22/994	147/16992	4.47e-05	0.000728993	0.000528515	AQP1/CACNA1H/CCNB1/CLIC4/CPNE6/ECT2/FOS/FOSB/GSN/ID2/ITPKB/JUN/JUNB/JUND/KCNK3/LRRK2/MEF2C/NFATC4/RASGRP2/RYR3/SHH/SLC25A23	22
GO:0001667	ameboidal-type cell migration	37/994	316/16992	4.5e-05	0.000732531	0.00053108	ADGRA2/AMOTL1/CORO1C/CYGB/DCN/DDR2/EDNRB/EGR3/FGF10/FGF2/FGF7/FGFR1/GLIPR2/HAND2/HBEGF/ILK/JUN/KLF4/NR4A1/NRP2/PITX2/PTGS2/RCC2/RGCC/RHOB/SHH/SLC8A1/SLIT2/SOX17/SRF/STARD13/STC1/TGFBR2/THBS1/TNFSF12/TNS1/ZEB2	37
GO:0051208	sequestering of calcium ion	18/994	107/16992	4.55e-05	0.000737888	0.000534964	ABL1/AKAP6/ANK2/ATP1A2/BDKRB1/CACNA1C/CASQ2/DMD/FGF2/ITPR1/ITPR3/JPH2/PDE4D/PLN/RYR2/RYR3/SLC25A23/SLC8A1	18
GO:0042659	regulation of cell fate specification	6/994	13/16992	4.74e-05	0.000767103	0.000556144	AR/FGF2/FGFR1/FZD7/SFRP2/SOX17	6
GO:0070838	divalent metal ion transport	46/994	428/16992	4.96e-05	0.000799534	0.000579656	ABL1/AHNAK/AKAP6/ANK2/ANXA6/ATP1A2/ATP2B4/BCL2/BDKRB1/CACNA1C/CACNA1H/CACNA2D1/CACNB2/CACNB4/CAMK2A/CASQ2/CCL2/CTGF/CXCL12/DENND5A/DMD/FGF2/FYN/GNAO1/ITPR1/ITPR3/JPH2/MYLK/NCS1/P2RX1/PDE2A/PDE4B/PDE4D/PKD1/PLN/PRKCB/PTGS2/RAMP1/RYR2/RYR3/SLC24A3/SLC25A23/	46
GO:0071453	cellular response to oxygen levels	27/994	202/16992	5.05e-05	0.000811255	0.000588154	ADAM8/AQP1/BCL2/CA9/CCNA2/CCNB1/CD34/CPEB1/CPEB2/CPEB4/DNMT3B/E2F1/EGR1/GATA6/HIF3A/KCNK3/KCNMB1/LPAR1/MYC/NDNF/PTGIS/PTGS2/RGCC/SFRP1/SLC2A4/SLC8A1/STC1	27
GO:0072503	cellular divalent inorganic cation homeostasis	45/994	416/16992	5.11e-05	0.000819028	0.00059379	ABL1/ADCY5/AGTR1/AKAP6/ANK2/ANXA6/ATP1A2/ATP2B4/BCL2/BDKRB1/BDKRB2/CACNA1C/CACNA2D1/CASQ2/CCL14/CCL2/CD55/CXCL12/CXCR4/DMD/DMPK/EDNRA/EDNRB/EPHX2/ESR1/FGF2/FYN/ITPR1/ITPR3/JPH2/KCNK3/LPAR1/PDE4D/PDGFRA/PKD1/PLN/PRKCB/RYR2/RYR3/S1PR1/SLC24A3/SLC25A23/SLC39	45
GO:0006261	DNA-dependent DNA replication	21/994	138/16992	5.15e-05	0.000821482	0.000595568	BMP5/CCNE1/CDC45/CDC6/CDT1/CHTF18/FEN1/FGFR1/GINS1/LIG1/MCM10/MCM2/MCM4/ORC6/PCNA/PID1/POLD1/POLQ/REV3L/RFC4/TONSL	21
GO:0061640	cytoskeleton-dependent cytokinesis	11/994	46/16992	5.22e-05	0.000825747	0.000598661	AURKB/CENPA/CEP55/CIT/KIF20A/KIF23/KIF4A/NUSAP1/PLK1/RACGAP1/STMN1	11
GO:0072132	mesenchyme morphogenesis	11/994	46/16992	5.22e-05	0.000825747	0.000598661	ACTA2/ACTC1/ACTG2/BMP5/DCHS1/FGFR1/FOXF1/MYC/TBX20/TGFBR2/TMEM100	11
GO:0048639	positive regulation of developmental growth	23/994	159/16992	5.22e-05	0.000825747	0.000598661	ACACB/AGRN/AKAP6/BCL2/CCNB1/CDK1/CPNE6/CXCL12/FGF2/FGFR1/GATA6/GHR/ILK/MAP1B/MAPT/MEF2C/NTRK3/SRF/TBX20/TBX5/TGFBR2/TGFBR3/ZFPM2	23
GO:0045931	positive regulation of mitotic cell cycle	20/994	128/16992	5.26e-05	0.000828745	0.000600834	ABL1/AURKA/CCNB1/CCND2/CDC45/CDC6/CDCA5/CDK1/CDT1/DLGAP5/FGF10/FGFR1/MAD2L1/NDC80/NUSAP1/PBX1/RANBP3L/RCC2/RGCC/UBE2C	20
GO:0006140	regulation of nucleotide metabolic process	29/994	225/16992	5.31e-05	0.000834728	0.000605172	ADCY5/ADCY9/ADGRD1/ADRB3/AKAP12/AKAP6/CAP2/CCNB1/CDK1/EDNRA/EDNRB/GNAL/GUCA1C/HDAC4/LPAR1/NPR1/OSTN/PALM/PDE2A/PDE4D/PDE5A/PID1/PRKAA2/PRKAG2/RAMP1/SLC25A23/THBS1/TIMP2/VIPR2	29
GO:0034333	adherens junction assembly	15/994	80/16992	5.33e-05	0.000835601	0.000605805	ACTN2/ARHGAP6/BCL2/CORO1C/DLC1/EPHA3/FERMT2/MYOC/PHLDB2/RCC2/SFRP1/SMAD7/SORBS1/THBS1/VCL	15
GO:0050769	positive regulation of neurogenesis	43/994	392/16992	5.4e-05	0.000842824	0.000611041	APBB1/ASPA/ASPM/BCL2/BIN1/BMP5/CDON/CNTN1/CPEB1/CPNE6/CXCL12/CXCR4/DNMT3B/DPYSL3/ECT2/EPHA3/EPHB2/EZH2/FGFR1/FLNA/FYN/ID2/IL6/IL6ST/ILK/LIF/LPAR1/LRP8/MAP1B/MAPT/MEF2C/NDNF/NEGR1/NTRK3/RAP1A/SHH/SLIT2/SRF/TCF4/TIMP2/ZEB1/ZEB2/ZNF488	43
GO:0044708	single-organism behavior	44/994	405/16992	5.58e-05	0.00086562	0.000627568	ADARB1/ADGRB3/ATP1A2/BCHE/BCL2/BTG2/CCND2/CLDN5/CXCL12/EGR2/EPHB2/FEN1/FOS/FOSL1/FOXP2/FYN/GRIN2D/ID2/IL6/ITGA5/ITGA8/ITPR3/JUN/LGI4/LRRK2/MAPT/MDK/MEF2C/MEIS2/NR4A2/NR4A3/NRXN1/PER3/PJA2/PRKAR2B/PTGDS/PTGS2/SGK1/SRF/SYNPO/TACR2/THBS1/THRA/TMOD1	44
GO:0055074	calcium ion homeostasis	44/994	405/16992	5.58e-05	0.00086562	0.000627568	ABL1/ADCY5/AGTR1/AKAP6/ANK2/ANXA6/ATP1A2/ATP2B4/BCL2/BDKRB1/BDKRB2/CACNA1C/CACNA2D1/CASQ2/CCL14/CCL2/CD55/CXCL12/CXCR4/DMD/DMPK/EDNRA/EDNRB/EPHX2/ESR1/FGF2/FYN/ITPR1/ITPR3/JPH2/KCNK3/LPAR1/PDE4D/PDGFRA/PKD1/PLN/PRKCB/RYR2/RYR3/S1PR1/SLC24A3/SLC25A23/SLC8A	44
GO:1901653	cellular response to peptide	37/994	320/16992	5.89e-05	0.000909413	0.000659318	ACTN2/ADCY5/ADCY9/AGTR1/CAMK2A/CCL2/CCNA2/CDC6/CPEB1/CPEB2/ERRFI1/FBN1/FYN/GHR/GLP2R/GNG11/GNG7/IL6/KANK1/KLF10/KLF2/KLF4/NR4A1/NR4A2/NR4A3/PDK4/PID1/PRKACB/PRKAR2B/PRKCB/SLC2A4/SOCS3/SORBS1/SREBF1/TIMELESS/TRIB3/ZNF106	37
GO:0097720	calcineurin-mediated signaling	8/994	25/16992	5.9e-05	0.000909413	0.000659318	AKAP6/ATP2B4/LMCD1/NFATC1/NFATC2/NFATC4/RCAN1/RCAN2	8
GO:1903115	regulation of actin filament-based movement	10/994	39/16992	6.01e-05	0.000924258	0.000670081	ANK2/ATP1A2/CACNA1C/FLNA/PDE4B/PDE4D/PLN/RYR2/STC1/TNNT2	10
GO:0001570	vasculogenesis	14/994	72/16992	6.2e-05	0.000947531	0.000686953	CD34/FOXF1/JUNB/MYOCD/PITX2/RAP1A/SHH/SOX17/TBX5/TGFBR2/TGFBR3/TIPARP/TMEM100/ZFPM2	14
GO:0048661	positive regulation of smooth muscle cell proliferation	14/994	72/16992	6.2e-05	0.000947531	0.000686953	ABCC4/HBEGF/HDAC4/ID2/IL6/JUN/NR4A3/PDGFD/PTGS2/RBPMS2/S1PR1/SKP2/TGFBR2/THBS1	14
GO:0072511	divalent inorganic cation transport	46/994	432/16992	6.22e-05	0.000947568	0.00068698	ABL1/AHNAK/AKAP6/ANK2/ANXA6/ATP1A2/ATP2B4/BCL2/BDKRB1/CACNA1C/CACNA1H/CACNA2D1/CACNB2/CACNB4/CAMK2A/CASQ2/CCL2/CTGF/CXCL12/DENND5A/DMD/FGF2/FYN/GNAO1/ITPR1/ITPR3/JPH2/MYLK/NCS1/P2RX1/PDE2A/PDE4B/PDE4D/PKD1/PLN/PRKCB/PTGS2/RAMP1/RYR2/RYR3/SLC24A3/SLC25A23/	46
GO:0006940	regulation of smooth muscle contraction	12/994	55/16992	6.36e-05	0.000962459	0.000697775	ATP1A2/CHRM2/CHRM3/CNN1/MYOCD/P2RX1/PRKG1/PTGS2/RGS2/SRF/TACR2/TACR3	12
GO:0014855	striated muscle cell proliferation	12/994	55/16992	6.36e-05	0.000962459	0.000697775	CCNB1/CDK1/FGF2/FGFR1/GATA6/MEF2C/SHH/TBX20/TBX5/TGFBR2/TGFBR3/ZFPM2	12
GO:1990138	neuron projection extension	21/994	140/16992	6.38e-05	0.000962639	0.000697906	ABL1/AURKA/CPNE6/CXCL12/DCLK1/DPYSL2/ILK/LAMB2/MAP1B/MAPT/NDN/NRP2/NTRK3/OLFM1/OSTN/PLXNA1/SEMA3G/SLIT2/SLIT3/SRF/VCL	21
GO:0090279	regulation of calcium ion import	17/994	100/16992	6.4e-05	0.000962639	0.000697906	ABL1/AKAP6/ANK2/ATP1A2/BDKRB1/CACNA1C/CASQ2/CCL2/CXCL12/DMD/FYN/JPH2/PDE4D/PLN/RYR2/SLC8A1/STC1	17
GO:1900180	regulation of protein localization to nucleus	28/994	216/16992	6.41e-05	0.000962639	0.000697906	AKAP6/C8orf4/CDK1/CDKN1A/CSF3/DACT3/DCLK1/ECT2/FLNA/FYN/FZD7/GTSE1/IL6/KANK1/LIF/PDE2A/PKD1/PKIG/PLK1/PTGS2/RAB23/RBPMS/SFRP2/SHH/TGFB3/THRA/TONSL/WWTR1	28
GO:0071241	cellular response to inorganic substance	24/994	172/16992	6.53e-05	0.000974707	0.000706655	AQP1/CACNA1H/CCNA2/CCNB1/CLIC4/CPNE6/ECT2/FOS/FOSB/GSN/ID2/ITPKB/JUN/JUNB/JUND/KCNK3/LRRK2/MEF2C/NFATC4/RASGRP2/RYR3/SHH/SLC25A23/TIMELESS	24
GO:0090130	tissue migration	30/994	239/16992	6.53e-05	0.000974707	0.000706655	ACTA2/ACTC1/ACTG2/ADGRA2/AMOTL1/CORO1C/DCN/EGR3/FGF10/FGF2/FGF7/FGFR1/FOXF1/GLIPR2/HBEGF/JUN/KLF4/NR4A1/NRP2/PTGS2/RGCC/RHOB/SLIT2/SRF/STARD13/STC1/TGFBR2/THBS1/TNFSF12/ZEB2	30
GO:0072009	nephron epithelium development	18/994	110/16992	6.62e-05	0.000985509	0.000714487	BCL2/CD34/DCHS1/FAT4/FGF2/ILK/KIF26B/LAMB2/LIF/MEF2C/MYC/PBX1/PECAM1/PKD1/PTCH1/SHH/TCF21/WWTR1	18
GO:0006026	aminoglycan catabolic process	13/994	64/16992	7.02e-05	0.00103798	0.00075253	AGRN/CSPG4/DCN/FGF2/GPC6/HMMR/HPSE2/HSPG2/OGN/OMD/PRELP/SDC2/SDC3	13
GO:0014909	smooth muscle cell migration	13/994	64/16992	7.02e-05	0.00103798	0.00075253	BCL2/HDAC4/IGFBP5/ILK/LPAR1/MYOCD/PARVA/PDGFD/PLAU/PLXNA1/SLIT2/TPM1/TRIB1	13
GO:0006469	negative regulation of protein kinase activity	30/994	240/16992	7.06e-05	0.00104082	0.000754586	ABL1/ADARB1/CDKN1A/CORO1C/DCN/DUSP1/DUSP2/DUSP5/ERRFI1/GADD45B/HIPK3/IL6/ILK/LATS2/MYOCD/PKIG/PLK1/PODN/PPP1R1A/PRKAG2/PRKAR2B/RGS2/SFRP1/SFRP2/SOCS3/SPRY1/TNFAIP3/TRIB1/TRIB3/WWTR1	30
GO:0030038	contractile actin filament bundle assembly	15/994	82/16992	7.18e-05	0.00104668	0.000758834	ARHGAP6/CTGF/DLC1/LPAR1/MYOC/PHLDB2/PTGER4/RGCC/S1PR1/SFRP1/SORBS1/SRF/STMN1/TGFB3/TPM1	15
GO:0043149	stress fiber assembly	15/994	82/16992	7.18e-05	0.00104668	0.000758834	ARHGAP6/CTGF/DLC1/LPAR1/MYOC/PHLDB2/PTGER4/RGCC/S1PR1/SFRP1/SORBS1/SRF/STMN1/TGFB3/TPM1	15
GO:0045778	positive regulation of ossification	15/994	82/16992	7.18e-05	0.00104668	0.000758834	CYR61/DDR2/IL6/IL6ST/ILK/JUND/MEF2C/PDLIM7/PKDCC/SFRP2/SLC8A1/TGFB3/TMEM119/ZBTB16/ZHX3	15
GO:0070301	cellular response to hydrogen peroxide	15/994	82/16992	7.18e-05	0.00104668	0.000758834	ABL1/AQP1/CDK1/ECT2/EZH2/IL6/KLF2/KLF4/LRRK2/NR4A3/PCNA/PDGFD/PYCR1/RHOB/TNFAIP3	15
GO:0060415	muscle tissue morphogenesis	14/994	73/16992	7.26e-05	0.0010556	0.000765299	ACTC1/ADARB1/COL11A1/HAND1/MYLK/PITX2/RYR2/S1PR1/SMAD7/TBX20/TGFBR3/TNNT2/TPM1/ZFPM2	14
GO:1901652	response to peptide	47/994	448/16992	7.47e-05	0.001078	0.000781546	ACTN2/ADCY5/ADCY9/AGTR1/BTG2/CAMK2A/CCL2/CCNA2/CDC6/CPEB1/CPEB2/CTGF/CXCL12/EGR1/EGR2/ERRFI1/FBN1/FYN/GHR/GLP2R/GNG11/GNG7/IGFBP5/IL6/IRF5/JUND/KANK1/KLF10/KLF2/KLF4/NR4A1/NR4A2/NR4A3/PDK4/PID1/PLN/PRKACB/PRKAR2B/PRKCB/SLC2A4/SOCS3/SORBS1/SREBF1/TIMELESS/	47
GO:0003158	endothelium development	18/994	111/16992	7.48e-05	0.001078	0.000781546	APOLD1/ARHGEF26/CD34/CLDN5/CLIC4/MYADM/PDE2A/PDE4D/PECAM1/RAP1A/RHOB/S1PR1/SCUBE1/SOX17/STARD13/STC1/TMEM100/ZEB1	18
GO:0032963	collagen metabolic process	18/994	111/16992	7.48e-05	0.001078	0.000781546	CCL2/COL10A1/COL11A1/COL19A1/COL4A6/COL7A1/CTGF/CYGB/ERRFI1/IL6/MFAP4/MMP11/MMP27/RAP1A/RGCC/TGFB3/TNS2/TNXB	18
GO:0060428	lung epithelium development	10/994	40/16992	7.6e-05	0.00109153	0.000791353	ERRFI1/FGF10/FGF7/FOXP2/GATA6/KLF2/NFIB/PKD1/SHH/THRA	10
GO:0014910	regulation of smooth muscle cell migration	12/994	56/16992	7.66e-05	0.00109769	0.000795815	BCL2/HDAC4/IGFBP5/ILK/LPAR1/MYOCD/PDGFD/PLAU/PLXNA1/SLIT2/TPM1/TRIB1	12
GO:0003214	cardiac left ventricle morphogenesis	6/994	14/16992	7.89e-05	0.00112738	0.000817342	FOXF1/HAND1/RYR2/SFRP2/TBX5/TGFBR2	6
GO:0086010	membrane depolarization during action potential	11/994	48/16992	7.94e-05	0.0011309	0.000819895	ANK2/ATP1A2/CACNA1C/CACNA1H/CACNA2D1/CACNB2/SCN11A/SCN4B/SCN7A/SLC8A1/SLMAP	11
GO:0043405	regulation of MAP kinase activity	37/994	325/16992	8.16e-05	0.00115949	0.000840622	ADAM8/AKAP13/CDK1/CSPG4/CXCR4/DUSP1/DUSP2/DUSP5/EZH2/FGF10/FGF2/FGFR1/GADD45B/GHR/HIPK3/ILK/IQGAP3/ITGA1/LPAR1/LRRK2/MAP3K20/MAP3K8/NTRK3/PDE5A/PDGFD/RAP1A/RGS2/ROR2/SFRP1/SFRP2/SPRY1/TGFB3/THBS1/TPD52L1/TRIB1/TRIB3/ZEB2	37
GO:0070507	regulation of microtubule cytoskeleton organization	20/994	132/16992	8.19e-05	0.00116066	0.000841467	ABL1/AURKA/C16orf45/CLIP3/DIXDC1/EPHA3/KIF11/MAPT/NEK2/PHLDB2/PKD1/PLK1/RANBP3L/RGS2/SKA1/SKA3/STIL/STMN1/TACC3/TPX2	20
GO:0014902	myotube differentiation	17/994	102/16992	8.28e-05	0.00116712	0.000846154	ADGRB3/BCL2/CACNA1H/CDON/DMPK/EHD2/HDAC4/KLHL41/LMOD3/MEF2C/MYOCD/NFATC2/PITX2/PLEKHO1/SHH/SIK1/THRA	17
GO:0002028	regulation of sodium ion transport	15/994	83/16992	8.3e-05	0.00116712	0.000846154	ATP1A2/ATP2B4/CNKSR3/CNTN1/DMD/DMPK/FXYD6/PER1/PRSS8/SCN4B/SIK1/SLC8A1/SLMAP/STOM/UTRN	15
GO:0035914	skeletal muscle cell differentiation	13/994	65/16992	8.31e-05	0.00116712	0.000846154	ASB2/ATF3/BTG2/CDON/EGR1/EGR2/FOS/HLF/KLHL41/MAFF/MEF2C/MEF2D/MYOCD	13
GO:0046822	regulation of nucleocytoplasmic transport	27/994	208/16992	8.41e-05	0.0011772	0.000853464	AKAP6/C8orf4/CDK1/CDKN1A/CSF3/DACT3/ECT2/FLNA/FZD7/GTSE1/IFI27/IL6/KANK1/PDE2A/PKD1/PKIG/PPP1R12A/PTGS2/RAB23/RBPMS/SFRP2/SHH/SOX4/TGFB3/THRA/TONSL/WWTR1	27
GO:0045598	regulation of fat cell differentiation	18/994	112/16992	8.44e-05	0.00117833	0.000854283	CCDC3/E2F1/ID2/IL6/JDP2/LMO3/MMP11/PTGS2/RUNX1T1/SFRP1/SFRP2/TGFB1I1/TRIB3/VSTM2A/WWTR1/ZBTB16/ZFP36/ZFPM2	18
GO:0014812	muscle cell migration	14/994	74/16992	8.48e-05	0.0011816	0.000856648	BCL2/HDAC4/IGFBP5/ILK/LPAR1/MYOCD/PARVA/PDGFD/PLAU/PLEKHO1/PLXNA1/SLIT2/TPM1/TRIB1	14
GO:0009187	cyclic nucleotide metabolic process	26/994	197/16992	8.56e-05	0.00118882	0.000861883	ADCY5/ADCY9/ADGRD1/ADRB3/AKAP12/AKAP6/AQP1/CAP2/EDNRA/EDNRB/GNAL/GUCA1C/LPAR1/NPR1/OSTN/PALM/PDE1A/PDE2A/PDE4B/PDE4D/PDE5A/PDE7B/RAMP1/THBS1/TIMP2/VIPR2	26
GO:0071902	positive regulation of protein serine/threonine kinase activity	35/994	302/16992	8.81e-05	0.00122096	0.000885186	ADAM8/AKAP13/ATP2B4/C8orf4/CCNB1/CCND2/CDC6/CDK1/CKS1B/CKS2/CSPG4/CXCR4/DUSP5/EZH2/FGF10/FGF2/FGFR1/GADD45B/GHR/ILK/IQGAP3/ITGA1/LPAR1/LRRK2/MAP3K20/NTRK3/PDE5A/PDGFD/PKD1/RGCC/ROR2/TGFB3/THBS1/TPD52L1/ZEB2	35
GO:0048511	rhythmic process	36/994	315/16992	9.37e-05	0.00128712	0.000933151	ADAMTS1/BCL2/CREM/CRY2/EGR1/EGR2/EGR3/ESR1/EZH2/HLF/ID2/IL6/INHBA/JUN/JUND/KLF10/KLF9/NFIL3/NTRK3/PAM/PCNA/PDGFRA/PER1/PER2/PER3/PRKAA2/PTGDS/SIK1/SLIT2/SLIT3/SREBF1/TEF/TGFB3/TIMELESS/TOP2A/TYMS	36
GO:0051209	release of sequestered calcium ion into cytosol	17/994	103/16992	9.38e-05	0.00128712	0.000933151	ABL1/AKAP6/ANK2/ATP1A2/BDKRB1/CACNA1C/CASQ2/DMD/FGF2/ITPR1/ITPR3/JPH2/PDE4D/PLN/RYR2/RYR3/SLC8A1	17
GO:0051283	negative regulation of sequestering of calcium ion	17/994	103/16992	9.38e-05	0.00128712	0.000933151	ABL1/AKAP6/ANK2/ATP1A2/BDKRB1/CACNA1C/CASQ2/DMD/FGF2/ITPR1/ITPR3/JPH2/PDE4D/PLN/RYR2/RYR3/SLC8A1	17
GO:1903169	regulation of calcium ion transmembrane transport	19/994	123/16992	9.39e-05	0.00128712	0.000933151	ABL1/AHNAK/AKAP6/ANK2/ATP1A2/BDKRB1/CACNA1C/CACNA2D1/CACNB2/CACNB4/CASQ2/DMD/FYN/JPH2/PDE4B/PDE4D/PLN/RYR2/SLC8A1	19
GO:0007080	mitotic metaphase plate congression	10/994	41/16992	9.53e-05	0.00129989	0.00094241	CCNB1/CDCA5/CDCA8/CDT1/CENPE/KIF14/KIF22/KIF2C/KIFC1/NDC80	10
GO:0032231	regulation of actin filament bundle assembly	15/994	84/16992	9.57e-05	0.00129989	0.00094241	ARHGAP6/CTGF/DLC1/LPAR1/MYOC/PHLDB2/PTGER4/RGCC/S1PR1/SFRP1/STMN1/SYNPO/SYNPO2/TGFB3/TPM1	15
GO:0051781	positive regulation of cell division	15/994	84/16992	9.57e-05	0.00129989	0.00094241	AURKB/CDC6/CIT/ECT2/FGF2/FGF7/KIF14/KIF23/MDK/PDGFD/RACGAP1/SHH/SVIL/TGFB3/VEGFD	15
GO:0045926	negative regulation of growth	28/994	221/16992	9.61e-05	0.00130196	0.000943908	ADRB3/APBB1/BCL2/BDKRB1/CDKN1A/CRYAB/CTSG/DACT3/DCUN1D3/EPHA7/FHL1/IGFBP5/INHBA/NPR1/OSTN/PTCH1/RERG/SEMA3G/SFRP1/SFRP2/SLIT2/SLIT3/SOX17/SPG20/TBX5/TGFBR2/TSPYL2/WFDC1	28
GO:0051962	positive regulation of nervous system development	47/994	453/16992	9.76e-05	0.00131959	0.00095669	ADGRB3/AGRN/APBB1/ASPA/ASPM/BCL2/BIN1/BMP5/CDC20/CDON/CNTN1/CPEB1/CPNE6/CXCL12/CXCR4/DNMT3B/DPYSL3/ECT2/EPHA3/EPHB2/EZH2/FGFR1/FLNA/FYN/ID2/IL6/IL6ST/ILK/LIF/LPAR1/LRP8/MAP1B/MAPT/MEF2C/NDNF/NEGR1/NRXN1/NTRK3/RAP1A/SHH/SLIT2/SRF/TCF4/TIMP2/ZEB1/ZEB2/ZNF48	47
GO:0050890	cognition	31/994	256/16992	9.8e-05	0.00132056	0.000957393	ADGRB3/ATP1A2/BCHE/BTG2/CCND2/CLDN5/EGR2/EPHB2/FEN1/FOS/FOSL1/FOXP2/FYN/ITGA5/ITGA8/ITPR3/JUN/MAPT/MDK/MEF2C/MEIS2/NRXN1/PJA2/PRKAR2B/PTGS2/SGK1/SOBP/SRF/SYNPO/TACR2/THRA	31
GO:0051348	negative regulation of transferase activity	39/994	353/16992	0.000101538	0.00136506	0.000989661	ABL1/ADARB1/BUB1B/CCNB1/CDC20/CDK1/CDKN1A/CORO1C/DCN/DUSP1/DUSP2/DUSP5/ERRFI1/GADD45B/HIPK3/IL6/ILK/LATS2/MAD2L1/MAPT/MYOCD/PKIG/PLK1/PODN/PPP1R1A/PRKAG2/PRKAR2B/RGS2/SFRP1/SFRP2/SMAD7/SOCS3/SPRY1/TNFAIP3/TRIB1/TRIB3/UBE2C/WWTR1/ZFP36	39
GO:0033673	negative regulation of kinase activity	31/994	257/16992	0.000105323	0.00141217	0.00102381	ABL1/ADARB1/CDKN1A/CORO1C/DCN/DUSP1/DUSP2/DUSP5/ERRFI1/GADD45B/HIPK3/IL6/ILK/LATS2/MAPT/MYOCD/PKIG/PLK1/PODN/PPP1R1A/PRKAG2/PRKAR2B/RGS2/SFRP1/SFRP2/SOCS3/SPRY1/TNFAIP3/TRIB1/TRIB3/WWTR1	31
GO:0035107	appendage morphogenesis	21/994	145/16992	0.000106995	0.00142476	0.00103294	AFF3/CACNA1C/FGF10/FGFR1/HAND2/MAP3K20/MYH3/PBX1/PITX1/PITX2/PKDCC/PTCH1/RECK/ROR2/SFRP2/SHH/SOX4/TBX4/TBX5/WNT9A/ZBTB16	21
GO:0035108	limb morphogenesis	21/994	145/16992	0.000106995	0.00142476	0.00103294	AFF3/CACNA1C/FGF10/FGFR1/HAND2/MAP3K20/MYH3/PBX1/PITX1/PITX2/PKDCC/PTCH1/RECK/ROR2/SFRP2/SHH/SOX4/TBX4/TBX5/WNT9A/ZBTB16	21
GO:0030261	chromosome condensation	9/994	34/16992	0.000107395	0.00142476	0.00103294	CCNB1/CDCA5/CDK1/NCAPD2/NCAPG/NCAPG2/NCAPH/NUSAP1/TOP2A	9
GO:0048566	embryonic digestive tract development	9/994	34/16992	0.000107395	0.00142476	0.00103294	FGF10/FOXF1/ID2/PDGFRA/PITX2/PKDCC/RBPMS2/SHH/TCF21	9
GO:0048732	gland development	44/994	417/16992	0.000110042	0.00145603	0.00105561	ABL1/AR/ARID5B/AURKA/BCL2/CCNB2/ESR1/ETV4/EZH2/FASN/FGF10/FGF7/FGFR1/FOXF1/GATA6/HAND2/ID2/IGFBP5/IL6/IQGAP3/JUN/LIMS2/MDK/NFIB/PAM/PBX1/PCNA/PITX1/PITX2/PKD1/PLXNA1/PTCH1/RAP1A/SFRP1/SHH/SRF/TCF21/TGFB3/TGFBR2/TGFBR3/THRA/TNFAIP3/TYMS/WLS	44
GO:0071383	cellular response to steroid hormone stimulus	30/994	246/16992	0.000110971	0.00146447	0.00106173	AKAP13/AQP1/AR/ATP1A2/CALCOCO1/CCL2/CCNE1/CRY2/DNMT3B/ERRFI1/ESR1/FBXO32/IL6/KANK2/KLF9/LMO3/NR2F1/NR3C2/NR4A1/NR4A2/NR4A3/PER1/PGR/SFRP1/SKP2/STC1/TCF21/TGFB1I1/THRA/ZFP36	30
GO:1901019	regulation of calcium ion transmembrane transporter activity	14/994	76/16992	0.000114657	0.00150915	0.00109413	AHNAK/AKAP6/ANK2/ATP1A2/CACNA2D1/CACNB2/CACNB4/CASQ2/DMD/JPH2/PDE4B/PDE4D/PLN/RYR2	14
GO:2000134	negative regulation of G1/S transition of mitotic cell cycle	16/994	95/16992	0.000116829	0.00153373	0.00111194	AURKA/BCL2/BTG2/CCNB1/CDK1/CDKN1A/DCUN1D3/E2F1/EZH2/FHL1/GTSE1/KANK2/NACC2/PCNA/RGCC/SOX4	16
GO:0001837	epithelial to mesenchymal transition	19/994	125/16992	0.000117142	0.00153383	0.00111202	BMP5/DACT3/EPHA3/EZH2/GLIPR2/OLFM1/PHLDB2/RGCC/SFRP1/SFRP2/SMAD7/SPRY1/TBX5/TGFB1I1/TGFB3/TGFBR2/TGFBR3/TMEM100/WWTR1	19
GO:0001101	response to acid chemical	36/994	319/16992	0.00012106	0.00158102	0.00114623	AQP1/ATP2B4/BCHE/CCL2/CCNB1/CPEB1/CPEB4/CTGF/DUSP1/E2F1/EGR1/EPHA3/FZD7/GSN/IL6/KCNMB1/KLF4/LDLR/MEF2C/NFATC4/NTRK3/PCNA/PDGFD/PDK4/PID1/PRKAA2/PTCH1/PTGER4/PTGFR/PTGS2/SFRP1/SREBF1/TGFBR3/TYMS/WNT9A/ZEB1	36
GO:0008217	regulation of blood pressure	23/994	168/16992	0.000123317	0.00160217	0.00116156	ACTA2/ADRB3/AGTR1/AR/ATP1A2/BDKRB1/CD34/CMA1/CPA3/CTSG/EDNRA/EDNRB/EPHX2/ID2/NCALD/NPR1/P2RX1/PDE4D/PTGS1/PTGS2/SGK1/TACR3/TPM1	23
GO:0042306	regulation of protein import into nucleus	23/994	168/16992	0.000123317	0.00160217	0.00116156	AKAP6/C8orf4/CDK1/CDKN1A/CSF3/DACT3/ECT2/FLNA/FZD7/IL6/KANK1/PDE2A/PKD1/PKIG/PTGS2/RAB23/RBPMS/SFRP2/SHH/TGFB3/THRA/TONSL/WWTR1	23
GO:0051895	negative regulation of focal adhesion assembly	6/994	15/16992	0.000125041	0.00162038	0.00117476	ARHGAP6/CORO1C/DLC1/PHLDB2/RCC2/THBS1	6
GO:0071875	adrenergic receptor signaling pathway	7/994	21/16992	0.000129214	0.00167015	0.00121085	ADCY9/ADRB3/AKAP13/ATP2B4/PDE4D/PLN/RGS2	7
GO:0070588	calcium ion transmembrane transport	32/994	272/16992	0.000131606	0.0016967	0.0012301	ABL1/AHNAK/AKAP6/ANK2/ATP1A2/ATP2B4/BDKRB1/CACNA1C/CACNA1H/CACNA2D1/CACNB2/CACNB4/CASQ2/DENND5A/DMD/FGF2/FYN/ITPR1/ITPR3/JPH2/NCS1/PDE2A/PDE4B/PDE4D/PKD1/PLN/RYR2/RYR3/SLC24A3/SLC25A23/SLC25A25/SLC8A1	32
GO:0031100	animal organ regeneration	14/994	77/16992	0.000132708	0.00169798	0.00123102	AURKA/CCL2/CCNA2/CDK1/CDKN1A/CXCL12/EZH2/MKI67/NR4A3/PCNA/RAP1A/TGFBR2/TGFBR3/TYMS	14
GO:0003211	cardiac ventricle formation	5/994	10/16992	0.000133447	0.00169798	0.00123102	HAND1/HAND2/MEF2C/SOX4/TBX5	5
GO:0035404	histone-serine phosphorylation	5/994	10/16992	0.000133447	0.00169798	0.00123102	AURKA/AURKB/CCNB1/PRKAA2/RPS6KA5	5
GO:0030308	negative regulation of cell growth	22/994	158/16992	0.000133731	0.00169798	0.00123102	APBB1/BCL2/BDKRB1/CDKN1A/CRYAB/DACT3/DCUN1D3/EPHA7/FHL1/INHBA/NPR1/OSTN/RERG/SEMA3G/SFRP1/SFRP2/SLIT2/SLIT3/SOX17/SPG20/TSPYL2/WFDC1	22
GO:0071772	response to BMP	22/994	158/16992	0.000133731	0.00169798	0.00123102	ABL1/BMP5/CHRDL1/CYR61/EGR1/FBN1/FSTL1/GATA5/GATA6/GREM2/ILK/RBPMS2/ROR2/RYR2/SFRP1/SFRP2/SMAD7/SPG20/TGFB3/TGFBR3/TMEM100/VSTM2A	22
GO:0071773	cellular response to BMP stimulus	22/994	158/16992	0.000133731	0.00169798	0.00123102	ABL1/BMP5/CHRDL1/CYR61/EGR1/FBN1/FSTL1/GATA5/GATA6/GREM2/ILK/RBPMS2/ROR2/RYR2/SFRP1/SFRP2/SMAD7/SPG20/TGFB3/TGFBR3/TMEM100/VSTM2A	22
GO:0044259	multicellular organismal macromolecule metabolic process	18/994	116/16992	0.000134126	0.00169871	0.00123155	CCL2/COL10A1/COL11A1/COL19A1/COL4A6/COL7A1/CTGF/CYGB/ERRFI1/IL6/MFAP4/MMP11/MMP27/RAP1A/RGCC/TGFB3/TNS2/TNXB	18
GO:0010811	positive regulation of cell-substrate adhesion	17/994	106/16992	0.000135117	0.00170696	0.00123753	ABI3BP/CCDC80/CYR61/FBLN2/FLNA/FOXF1/ILK/ITGA5/MYADM/MYOC/NDNF/RAC3/SFRP1/SMOC2/UNC13D/UTRN/VIT	17
GO:0010712	regulation of collagen metabolic process	9/994	35/16992	0.00013713	0.00172373	0.00124969	CCL2/CTGF/CYGB/ERRFI1/IL6/MFAP4/RAP1A/RGCC/TGFB3	9
GO:0086004	regulation of cardiac muscle cell contraction	9/994	35/16992	0.00013713	0.00172373	0.00124969	ANK2/ATP1A2/CACNA1C/FLNA/PDE4B/PDE4D/PLN/RYR2/STC1	9
GO:0045214	sarcomere organization	10/994	43/16992	0.000146466	0.00183648	0.00133144	ACTN2/AKAP13/CASQ2/CFL2/KLHL41/MEF2C/MYH3/MYOM1/SRF/TPM1	10
GO:0010769	regulation of cell morphogenesis involved in differentiation	30/994	250/16992	0.000148364	0.00185106	0.001342	ABL1/ADGRB3/CORO1C/CXCL12/DPYSL2/EPHA7/EPHB2/FLNA/ILK/KANK1/LRP8/LRRK2/MAP1B/MAPT/MYADM/MYOC/NFATC4/NTRK3/OLFM1/PLXNA1/RAC3/RCC2/SDC2/SEMA3G/SLIT2/SPG20/SRF/UNC13D/UST/ZEB2	30
GO:0060326	cell chemotaxis	30/994	250/16992	0.000148364	0.00185106	0.001342	ADAM8/AGTR1/CCL14/CCL2/CH25H/CXCL12/CXCL2/CXCR4/EDNRB/EGR3/FGF2/FGFR1/GPR183/HBEGF/IL6/ITGA1/ITGA9/JAM3/LPAR1/NCKAP1L/NR4A1/PARVA/PDE4B/PDE4D/PDGFD/PDGFRA/S1PR1/SLIT2/THBS1/VEGFD	30
GO:0051480	regulation of cytosolic calcium ion concentration	34/994	298/16992	0.000149859	0.00186508	0.00135217	ABL1/ADCY5/AGTR1/AKAP6/ANK2/ATP1A2/ATP2B4/BCL2/BDKRB1/BDKRB2/CACNA1C/CACNA2D1/CASQ2/CD55/CXCR4/DMD/EDNRA/EDNRB/ESR1/FGF2/FYN/ITPR1/ITPR3/JPH2/KCNK3/LPAR1/PDE4D/PDGFRA/PKD1/PLN/RYR2/RYR3/S1PR1/SLC8A1	34
GO:0001649	osteoblast differentiation	26/994	204/16992	0.000152674	0.00189541	0.00137416	CYR61/DDR2/FASN/HAND2/HDAC4/ID2/IGFBP5/IL6/IL6ST/ILK/JUNB/JUND/MEF2C/MEF2D/MYOC/OSTN/PDLIM7/PTCH1/RANBP3L/SFRP1/SFRP2/SHH/TMEM119/TP53INP2/WWTR1/ZHX3	26
GO:0050848	regulation of calcium-mediated signaling	14/994	78/16992	0.000153168	0.00189686	0.00137521	AKAP6/ATP2B4/CASQ2/DMD/ITPR1/JPH2/LMCD1/LRRK2/MAPT/PDE4D/PLN/RCAN1/RCAN2/TMEM100	14
GO:0072507	divalent inorganic cation homeostasis	45/994	436/16992	0.000153783	0.00189981	0.00137735	ABL1/ADCY5/AGTR1/AKAP6/ANK2/ANXA6/ATP1A2/ATP2B4/BCL2/BDKRB1/BDKRB2/CACNA1C/CACNA2D1/CASQ2/CCL14/CCL2/CD55/CXCL12/CXCR4/DMD/DMPK/EDNRA/EDNRB/EPHX2/ESR1/FGF2/FYN/ITPR1/ITPR3/JPH2/KCNK3/LPAR1/PDE4D/PDGFRA/PKD1/PLN/PRKCB/RYR2/RYR3/S1PR1/SLC24A3/SLC25A23/SLC39	45
GO:0036294	cellular response to decreased oxygen levels	25/994	193/16992	0.000156915	0.00193375	0.00140195	ADAM8/AQP1/BCL2/CA9/CCNA2/CCNB1/CD34/CPEB1/CPEB2/CPEB4/E2F1/EGR1/GATA6/HIF3A/KCNK3/KCNMB1/MYC/NDNF/PTGIS/PTGS2/RGCC/SFRP1/SLC2A4/SLC8A1/STC1	25
GO:0051303	establishment of chromosome localization	13/994	69/16992	0.000157445	0.00193553	0.00140324	CCNB1/CDCA5/CDCA8/CDT1/CENPE/CENPF/DLGAP5/GEM/KIF14/KIF22/KIF2C/KIFC1/NDC80	13
GO:0007596	blood coagulation	38/994	348/16992	0.000158034	0.00193804	0.00140507	A2M/CD34/CSRP1/DGKB/EHD2/ENTPD1/F10/FAM46A/FLNA/FYN/GATA5/GATA6/IL6/ILK/ITPR1/ITPR3/MAFF/MMRN1/MYL9/P2RX1/PDGFD/PDGFRA/PLAU/PRKACB/PRKAR2B/PRKCB/PRKG1/RHOB/SCARA5/SCUBE1/SELP/SHH/SRF/THBS1/TLN1/VCL/VWF/ZFPM2	38
GO:0061041	regulation of wound healing	19/994	128/16992	0.000161392	0.00196988	0.00142815	CCL2/CD34/FAM46A/FGF2/GSN/HBEGF/KANK1/MYLK/PDGFRA/PHLDB2/PLAU/PLPP3/PRKG1/SCARA5/SELP/TGFBR2/THBS1/TNFAIP3/WFDC1	19
GO:1904589	regulation of protein import	23/994	171/16992	0.000161414	0.00196988	0.00142815	AKAP6/C8orf4/CDK1/CDKN1A/CSF3/DACT3/ECT2/FLNA/FZD7/IL6/KANK1/PDE2A/PKD1/PKIG/PTGS2/RAB23/RBPMS/SFRP2/SHH/TGFB3/THRA/TONSL/WWTR1	23
GO:0000302	response to reactive oxygen species	28/994	228/16992	0.000164622	0.00200012	0.00145007	ABL1/AQP1/BCL2/CCNA2/CDK1/CRYAB/DUSP1/ECT2/EZH2/FBLN5/FOS/FOSL1/GNAO1/IL6/JUN/KLF2/KLF4/LRRK2/NR4A3/PCNA/PDGFD/PDGFRA/PYCR1/RHOB/SLC8A1/SOD3/TNFAIP3/TPM1	28
GO:0010522	regulation of calcium ion transport into cytosol	15/994	88/16992	0.000164688	0.00200012	0.00145007	ABL1/AKAP6/ANK2/ATP1A2/BCL2/BDKRB1/CACNA1C/CASQ2/DMD/FYN/JPH2/PDE4D/PLN/RYR2/SLC8A1	15
GO:0000910	cytokinesis	20/994	139/16992	0.000169389	0.00205226	0.00148787	AURKA/AURKB/CDC6/CENPA/CEP55/CIT/ECT2/KIF13A/KIF14/KIF20A/KIF23/KIF4A/KLHL13/NUSAP1/PLK1/PRC1/RACGAP1/RHOB/STMN1/SVIL	20
GO:1902807	negative regulation of cell cycle G1/S phase transition	16/994	98/16992	0.000170216	0.00205733	0.00149155	AURKA/BCL2/BTG2/CCNB1/CDK1/CDKN1A/DCUN1D3/E2F1/EZH2/FHL1/GTSE1/KANK2/NACC2/PCNA/RGCC/SOX4	16
GO:1904062	regulation of cation transmembrane transport	30/994	252/16992	0.000170994	0.00206177	0.00149477	ABL1/ACTN2/AHNAK/AKAP6/ANK2/ATP1A2/ATP2B4/BDKRB1/CACNA1C/CACNA2D1/CACNB2/CACNB4/CASQ2/DMD/FHL1/FLNA/FXYD6/FYN/JPH2/KCNMB1/MEF2C/PDE4B/PDE4D/PLN/RYR2/SCN4B/SLC8A1/SLMAP/STOM/UTRN	30
GO:0044246	regulation of multicellular organismal metabolic process	9/994	36/16992	0.000173437	0.00208124	0.00150888	CCL2/CTGF/CYGB/ERRFI1/IL6/MFAP4/RAP1A/RGCC/TGFB3	9
GO:1904031	positive regulation of cyclin-dependent protein kinase activity	9/994	36/16992	0.000173437	0.00208124	0.00150888	CCNB1/CCND2/CDC6/CDKN1A/CKS1B/CKS2/FGF10/PKD1/RGCC	9
GO:0051017	actin filament bundle assembly	19/994	129/16992	0.000179101	0.00214409	0.00155445	ARHGAP6/CTGF/DLC1/DPYSL3/FSCN1/LPAR1/MYOC/PHLDB2/PTGER4/RGCC/S1PR1/SFRP1/SORBS1/SRF/STMN1/SYNPO/SYNPO2/TGFB3/TPM1	19
GO:0021952	central nervous system projection neuron axonogenesis	7/994	22/16992	0.000179993	0.00214966	0.00155849	ADARB1/DCLK1/EPHB2/NFIB/NR4A2/SLIT2/ZEB2	7
GO:0007045	cell-substrate adherens junction assembly	13/994	70/16992	0.000183154	0.00216682	0.00157093	ACTN2/ARHGAP6/BCL2/CORO1C/DLC1/EPHA3/FERMT2/MYOC/PHLDB2/RCC2/SFRP1/SORBS1/THBS1	13
GO:0034502	protein localization to chromosome	13/994	70/16992	0.000183154	0.00216682	0.00157093	AURKB/BUB1B/CDCA5/CDK1/CDT1/CENPA/ESR1/EZH2/KNL1/NDC80/PLK1/RCC2/TTK	13
GO:0048041	focal adhesion assembly	13/994	70/16992	0.000183154	0.00216682	0.00157093	ACTN2/ARHGAP6/BCL2/CORO1C/DLC1/EPHA3/FERMT2/MYOC/PHLDB2/RCC2/SFRP1/SORBS1/THBS1	13
GO:0050000	chromosome localization	13/994	70/16992	0.000183154	0.00216682	0.00157093	CCNB1/CDCA5/CDCA8/CDT1/CENPE/CENPF/DLGAP5/GEM/KIF14/KIF22/KIF2C/KIFC1/NDC80	13
GO:0071229	cellular response to acid chemical	25/994	195/16992	0.000184813	0.00218132	0.00158144	AQP1/CCL2/CCNB1/CPEB1/CPEB4/E2F1/EGR1/EPHA3/FZD7/KCNMB1/KLF4/LDLR/MEF2C/NFATC4/NTRK3/PDGFD/PDK4/PID1/PRKAA2/PTGER4/PTGFR/SFRP1/SREBF1/WNT9A/ZEB1	25
GO:0031000	response to caffeine	6/994	16/16992	0.000190189	0.00223427	0.00161983	CASQ2/DNMT3B/IL6/RYR2/RYR3/SLC8A1	6
GO:1903392	negative regulation of adherens junction organization	6/994	16/16992	0.000190189	0.00223427	0.00161983	ARHGAP6/CORO1C/DLC1/PHLDB2/RCC2/THBS1	6
GO:1903034	regulation of response to wounding	21/994	151/16992	0.000191523	0.0022447	0.00162739	CCL2/CD34/FAM46A/FGF2/GSN/HBEGF/KANK1/KLF4/MYLK/NTRK3/PDGFRA/PHLDB2/PLAU/PLPP3/PRKG1/SCARA5/SELP/TGFBR2/THBS1/TNFAIP3/WFDC1	21
GO:0021543	pallium development	22/994	162/16992	0.000193141	0.00225841	0.00163733	ASPM/ATP2B4/BTG2/C16orf45/CDON/DIXDC1/EZH2/FAT4/FLNA/FOXP2/H2AFX/KIF14/LRP8/MDK/MEF2C/NR4A3/SLIT2/SRF/TACC1/TACC2/TACC3/ZEB2	22
GO:0050817	coagulation	38/994	352/16992	0.000199657	0.00232917	0.00168863	A2M/CD34/CSRP1/DGKB/EHD2/ENTPD1/F10/FAM46A/FLNA/FYN/GATA5/GATA6/IL6/ILK/ITPR1/ITPR3/MAFF/MMRN1/MYL9/P2RX1/PDGFD/PDGFRA/PLAU/PRKACB/PRKAR2B/PRKCB/PRKG1/RHOB/SCARA5/SCUBE1/SELP/SHH/SRF/THBS1/TLN1/VCL/VWF/ZFPM2	38
GO:0086065	cell communication involved in cardiac conduction	11/994	53/16992	0.000204825	0.00238393	0.00172833	ANK2/ATP1A2/CACNA1C/CACNA2D1/CACNB2/CASQ2/FLNA/PDE4D/RYR2/SCN4B/SLC8A1	11
GO:0022612	gland morphogenesis	18/994	120/16992	0.000207987	0.00241515	0.00175096	AR/BCL2/ESR1/ETV4/FGF10/FGF7/FGFR1/IGFBP5/IL6/LIMS2/NFIB/PLXNA1/PTCH1/SFRP1/SHH/TGFB3/TGFBR2/TNFAIP3	18
GO:0030799	regulation of cyclic nucleotide metabolic process	22/994	163/16992	0.00021122	0.00243804	0.00176756	ADCY5/ADCY9/ADGRD1/ADRB3/AKAP12/AKAP6/CAP2/EDNRA/EDNRB/GNAL/GUCA1C/LPAR1/NPR1/OSTN/PALM/PDE2A/PDE4D/PDE5A/RAMP1/THBS1/TIMP2/VIPR2	22
GO:0048863	stem cell differentiation	22/994	163/16992	0.00021122	0.00243804	0.00176756	A2M/BCHE/CORO1C/EDNRA/EDNRB/EPCAM/ESR1/ETV4/GATA6/HAND2/LIF/MEF2C/MEOX1/MYOCD/PDGFRA/PITX2/SFRP1/SHH/SOX17/SRF/TBX5/ZEB2	22
GO:0007599	hemostasis	38/994	353/16992	0.000211493	0.00243804	0.00176756	A2M/CD34/CSRP1/DGKB/EHD2/ENTPD1/F10/FAM46A/FLNA/FYN/GATA5/GATA6/IL6/ILK/ITPR1/ITPR3/MAFF/MMRN1/MYL9/P2RX1/PDGFD/PDGFRA/PLAU/PRKACB/PRKAR2B/PRKCB/PRKG1/RHOB/SCARA5/SCUBE1/SELP/SHH/SRF/THBS1/TLN1/VCL/VWF/ZFPM2	38
GO:0051279	regulation of release of sequestered calcium ion into cytosol	13/994	71/16992	0.000212383	0.00243804	0.00176756	ABL1/AKAP6/ANK2/ATP1A2/BDKRB1/CACNA1C/CASQ2/DMD/JPH2/PDE4D/PLN/RYR2/SLC8A1	13
GO:0051492	regulation of stress fiber assembly	13/994	71/16992	0.000212383	0.00243804	0.00176756	ARHGAP6/CTGF/DLC1/LPAR1/MYOC/PHLDB2/PTGER4/RGCC/S1PR1/SFRP1/STMN1/TGFB3/TPM1	13
GO:0055008	cardiac muscle tissue morphogenesis	12/994	62/16992	0.000214454	0.0024562	0.00178073	ACTC1/COL11A1/HAND1/PITX2/RYR2/S1PR1/SMAD7/TBX20/TGFBR3/TNNT2/TPM1/ZFPM2	12
GO:0071456	cellular response to hypoxia	24/994	186/16992	0.000223514	0.00255415	0.00185174	ADAM8/AQP1/BCL2/CA9/CCNA2/CCNB1/CD34/CPEB1/CPEB2/E2F1/EGR1/GATA6/HIF3A/KCNK3/KCNMB1/MYC/NDNF/PTGIS/PTGS2/RGCC/SFRP1/SLC2A4/SLC8A1/STC1	24
GO:0000022	mitotic spindle elongation	5/994	11/16992	0.000232868	0.00264303	0.00191617	AURKB/KIF23/KIF4A/PRC1/RACGAP1	5
GO:0070341	fat cell proliferation	5/994	11/16992	0.000232868	0.00264303	0.00191617	E2F1/FGF10/PER2/PID1/VSTM2A	5
GO:0070344	regulation of fat cell proliferation	5/994	11/16992	0.000232868	0.00264303	0.00191617	E2F1/FGF10/PER2/PID1/VSTM2A	5
GO:1902904	negative regulation of supramolecular fiber organization	17/994	111/16992	0.000239693	0.00271436	0.00196789	ARHGAP6/C16orf45/CLIP3/CLU/CRYAB/DLC1/GSN/KANK1/LMOD1/LMOD3/MYADM/MYOC/PHLDB2/S1PR1/SLIT2/STMN1/TMOD1	17
GO:0001706	endoderm formation	11/994	54/16992	0.000243805	0.00274517	0.00199023	COL11A1/COL7A1/DUSP1/DUSP2/DUSP5/GATA6/INHBA/ITGA5/ITGA7/SOX17/TBX20	11
GO:0001953	negative regulation of cell-matrix adhesion	8/994	30/16992	0.000245689	0.00274517	0.00199023	ARHGAP6/CORO1C/DLC1/MYOC/PHLDB2/RCC2/SEMA3E/THBS1	8
GO:0032965	regulation of collagen biosynthetic process	8/994	30/16992	0.000245689	0.00274517	0.00199023	CCL2/CTGF/CYGB/ERRFI1/IL6/RAP1A/RGCC/TGFB3	8
GO:0061614	pri-miRNA transcription from RNA polymerase II promoter	8/994	30/16992	0.000245689	0.00274517	0.00199023	FOS/FOSL1/HDAC4/JUN/NFATC4/NFIB/SRF/TEAD1	8
GO:0086019	cell-cell signaling involved in cardiac conduction	8/994	30/16992	0.000245689	0.00274517	0.00199023	ANK2/CACNA1C/CACNA2D1/CACNB2/CASQ2/FLNA/RYR2/SCN4B	8
GO:0090075	relaxation of muscle	8/994	30/16992	0.000245689	0.00274517	0.00199023	ATP1A2/PDE4B/PDE4D/PDE5A/PLN/PRKG1/RGS2/SLC8A1	8
GO:0045216	cell-cell junction organization	27/994	222/16992	0.000250565	0.00279344	0.00202522	ACTN2/ANK2/ARHGAP6/BCL2/CDH3/CLDN5/CORO1C/DLC1/ECT2/EPHA3/FERMT2/FSCN1/LIMS2/MPP7/MYOC/NFASC/PHLDB2/RASSF8/RCC2/SFRP1/SMAD7/SORBS1/SRF/TGFB3/THBS1/TLN1/VCL	27
GO:0003018	vascular process in circulatory system	21/994	154/16992	0.000252575	0.00280961	0.00203695	ACTA2/ADRB3/AGTR1/ATP1A2/BDKRB2/CHRM3/EDNRA/EDNRB/EPHX2/ITGA1/KCNMB1/NPR1/P2RX1/PDE2A/PER2/PRKG1/PTGS2/RGS2/SLC8A1/SLIT2/TACR2	21
GO:0048568	embryonic organ development	43/994	420/16992	0.000254719	0.00282722	0.00204971	BMP5/CC2D2A/COL11A1/CYR61/EPHB2/FBN1/FGF10/FGFR1/FOXF1/HAND1/HAND2/ID2/ITGA8/JUNB/LIF/MEF2C/MFAP2/MTHFD1L/NES/NR4A3/PBX1/PDGFRA/PITX2/PKD1/PKDCC/PTCH1/RBPMS2/ROR2/RYR2/SHH/SOBP/SOCS3/SOX17/SRF/STIL/TBX20/TCF21/TEAD1/TGFB3/TGFBR2/WNT9A/ZEB1/ZFPM2	43
GO:0007050	cell cycle arrest	29/994	246/16992	0.000257684	0.00285382	0.002069	ABL1/APBB1/AURKA/BIN1/BTG2/CCNB1/CDK1/CDKN1A/DUSP1/E2F1/FGF10/FOXM1/GAS7/GATA6/GTSE1/ID2/ILK/INHBA/MAP3K20/MYC/PCNA/PKD1/PPP1R15A/PRKAA2/PRKAG2/PRR11/RGCC/SOX4/THBS1	29
GO:0046620	regulation of organ growth	14/994	82/16992	0.000264632	0.00292433	0.00212011	ACACB/AKAP6/CCNB1/CDK1/FGF2/FGFR1/GATA6/LATS2/MEF2C/TBX20/TBX5/TGFBR2/TGFBR3/ZFPM2	14
GO:0061572	actin filament bundle organization	19/994	133/16992	0.000268124	0.00295642	0.00214338	ARHGAP6/CTGF/DLC1/DPYSL3/FSCN1/LPAR1/MYOC/PHLDB2/PTGER4/RGCC/S1PR1/SFRP1/SORBS1/SRF/STMN1/SYNPO/SYNPO2/TGFB3/TPM1	19
GO:0072080	nephron tubule development	15/994	92/16992	0.00027333	0.00300723	0.00218022	BCL2/DCHS1/FAT4/FGF2/ILK/KIF26B/LIF/MEF2C/MYC/PBX1/PKD1/PTCH1/SHH/TCF21/WWTR1	15
GO:0010948	negative regulation of cell cycle process	31/994	271/16992	0.000275228	0.0030215	0.00219057	AURKA/AURKB/BCL2/BTG2/BUB1/BUB1B/CCNB1/CDK1/CDKN1A/CDT1/CENPF/DCUN1D3/DUSP1/E2F1/EZH2/FANCI/FBXL7/FGF10/FHL1/FOXN3/GTSE1/KANK2/LIF/MAD2L1/NACC2/NDC80/PCNA/PLK1/RGCC/SOX4/TTK	31
GO:0072593	reactive oxygen species metabolic process	28/994	236/16992	0.000293835	0.00321874	0.00233356	AGTR1/AOX1/ARG2/ATP2B4/BCL2/CD34/CDKN1A/CLU/CRYAB/CTGF/CYR61/EPHX2/FBLN5/FOXM1/HDAC4/IL6/KLF2/KLF4/LRRK2/MAOB/MAPT/PDK4/PID1/PTGIS/PTGS2/SOD3/TGFBR2/THBS1	28
GO:0043410	positive regulation of MAPK cascade	47/994	475/16992	0.000294665	0.00322081	0.00233507	ABL1/ADAM8/ADRB3/AKAP13/AR/CCL14/CCL2/CDK1/CDON/CSPG4/CTGF/CXCR4/DUSP5/EZH2/FGF10/FGF2/FGFR1/FZD7/GADD45B/GHR/GLIPR2/GPR183/HAND2/IL6/ILK/IQGAP3/ITGA1/JUN/LIF/LPAR1/LRRK2/MAP3K20/MAP3K8/NTRK3/PDE5A/PDGFD/PDGFRA/PELI2/PLA2G5/RAP1A/ROR2/TGFB3/THBS1/TIMP2/TN	47
GO:2000027	regulation of organ morphogenesis	29/994	248/16992	0.000295624	0.00322429	0.00233759	ABL1/AR/BCL2/CD34/CELSR3/ESR1/ETV4/FGF10/FGF7/FGFR1/FOXP2/FZD7/GPC6/HAND2/LIF/LIMS2/MYC/NFIB/PRICKLE2/ROR1/ROR2/SFRP1/SFRP2/SHH/SOX17/SPRY1/TBX5/TGFBR2/TNFAIP3	29
GO:0007264	small GTPase mediated signal transduction	48/994	490/16992	0.000321144	0.00349505	0.00253389	A2M/AGTR1/AKAP13/ARHGAP10/ARHGAP11A/ARHGAP20/ARHGAP6/ARHGEF17/ARHGEF25/ARHGEF26/ARHGEF37/ARHGEF9/CCNA2/CDC42EP3/CDKN1A/CDON/DLC1/ECT2/FAM13B/FGF10/FGF2/FOXM1/IQGAP3/ITPKB/JUN/KANK1/KIF14/LPAR1/LRRK2/MRAS/MYOC/PLEKHG4B/PSD/RAC3/RACGAP1/RAP1A/RASGRP2/RERG/R	48
GO:0071375	cellular response to peptide hormone stimulus	33/994	298/16992	0.000323338	0.00351132	0.00254568	ACTN2/ADCY5/ADCY9/AGTR1/CAMK2A/CCL2/CCNA2/CDC6/CPEB1/CPEB2/ERRFI1/FBN1/FYN/GHR/GLP2R/GNG11/GNG7/IL6/KANK1/NR4A1/NR4A2/NR4A3/PDK4/PID1/PRKACB/PRKAR2B/PRKCB/SLC2A4/SOCS3/SORBS1/SREBF1/TRIB3/ZNF106	33
GO:0014002	astrocyte development	7/994	24/16992	0.000329548	0.00356337	0.00258341	LAMB2/LAMC3/MAPT/PLP1/ROR1/ROR2/TSPAN2	7
GO:0072012	glomerulus vasculature development	7/994	24/16992	0.000329548	0.00356337	0.00258341	ACTA2/CD34/EGR1/PDGFD/PDGFRA/PECAM1/TCF21	7
GO:0003170	heart valve development	9/994	39/16992	0.000333283	0.00358832	0.00260151	CYR61/DCHS1/MEF2C/OLFM1/PITX2/SOX4/TBX20/TBX5/TGFBR2	9
GO:0010761	fibroblast migration	9/994	39/16992	0.000333283	0.00358832	0.00260151	CORO1C/CYGB/DDR2/FGF2/ILK/RCC2/SLC8A1/THBS1/TNS1	9
GO:0086001	cardiac muscle cell action potential	12/994	65/16992	0.000340215	0.00365513	0.00264994	ANK2/ATP1A2/CACNA1C/CACNA2D1/CACNB2/DMD/FLNA/KCND3/RYR2/SCN4B/SLC8A1/SLMAP	12
GO:0048145	regulation of fibroblast proliferation	14/994	84/16992	0.000342652	0.00366564	0.00265757	AQP1/CCNA2/CCNB1/CDC6/CDKN1A/DDR2/E2F1/ESR1/FGF10/JUN/MYC/PDGFD/PDGFRA/SFRP1	14
GO:1901655	cellular response to ketone	14/994	84/16992	0.000342652	0.00366564	0.00265757	ADCY5/AQP1/AR/CCL2/DNMT3B/ERRFI1/FBXO32/IL6/KLF2/KLF4/KLF9/PRKAA2/PTGER4/SFRP1	14
GO:0061326	renal tubule development	15/994	94/16992	0.000347699	0.0036808	0.00266856	BCL2/DCHS1/FAT4/FGF2/ILK/KIF26B/LIF/MEF2C/MYC/PBX1/PKD1/PTCH1/SHH/TCF21/WWTR1	15
GO:0030326	embryonic limb morphogenesis	18/994	125/16992	0.000348461	0.0036808	0.00266856	AFF3/CACNA1C/FGFR1/HAND2/MAP3K20/MYH3/PBX1/PITX1/PITX2/PTCH1/RECK/ROR2/SFRP2/SHH/TBX4/TBX5/WNT9A/ZBTB16	18
GO:0035113	embryonic appendage morphogenesis	18/994	125/16992	0.000348461	0.0036808	0.00266856	AFF3/CACNA1C/FGFR1/HAND2/MAP3K20/MYH3/PBX1/PITX1/PITX2/PTCH1/RECK/ROR2/SFRP2/SHH/TBX4/TBX5/WNT9A/ZBTB16	18
GO:0035296	regulation of tube diameter	18/994	125/16992	0.000348461	0.0036808	0.00266856	ACTA2/ADRB3/AGTR1/ATP1A2/BDKRB2/CHRM3/EDNRA/EDNRB/EPHX2/ITGA1/KCNMB1/NPR1/P2RX1/PER2/PRKG1/PTGS2/RGS2/SLC8A1	18
GO:0051238	sequestering of metal ion	18/994	125/16992	0.000348461	0.0036808	0.00266856	ABL1/AKAP6/ANK2/ATP1A2/BDKRB1/CACNA1C/CASQ2/DMD/FGF2/ITPR1/ITPR3/JPH2/PDE4D/PLN/RYR2/RYR3/SLC25A23/SLC8A1	18
GO:0097746	regulation of blood vessel diameter	18/994	125/16992	0.000348461	0.0036808	0.00266856	ACTA2/ADRB3/AGTR1/ATP1A2/BDKRB2/CHRM3/EDNRA/EDNRB/EPHX2/ITGA1/KCNMB1/NPR1/P2RX1/PER2/PRKG1/PTGS2/RGS2/SLC8A1	18
GO:0048736	appendage development	22/994	169/16992	0.000354409	0.00372797	0.00270275	AFF3/CACNA1C/FGF10/FGFR1/HAND2/MAP3K20/MYH3/PAM/PBX1/PITX1/PITX2/PKDCC/PTCH1/RECK/ROR2/SFRP2/SHH/SOX4/TBX4/TBX5/WNT9A/ZBTB16	22
GO:0060173	limb development	22/994	169/16992	0.000354409	0.00372797	0.00270275	AFF3/CACNA1C/FGF10/FGFR1/HAND2/MAP3K20/MYH3/PAM/PBX1/PITX1/PITX2/PKDCC/PTCH1/RECK/ROR2/SFRP2/SHH/SOX4/TBX4/TBX5/WNT9A/ZBTB16	22
GO:0043434	response to peptide hormone	41/994	401/16992	0.000361024	0.00378962	0.00274745	ACTN2/ADCY5/ADCY9/AGTR1/BTG2/CAMK2A/CCL2/CCNA2/CDC6/CPEB1/CPEB2/CTGF/CXCL12/EGR1/EGR2/ERRFI1/FBN1/FYN/GHR/GLP2R/GNG11/GNG7/IGFBP5/IL6/JUND/KANK1/NR4A1/NR4A2/NR4A3/PDK4/PID1/PLN/PRKACB/PRKAR2B/PRKCB/SLC2A4/SOCS3/SORBS1/SREBF1/TRIB3/ZNF106	41
GO:0051056	regulation of small GTPase mediated signal transduction	33/994	300/16992	0.000365027	0.00382366	0.00277212	A2M/AKAP13/ARHGAP10/ARHGAP11A/ARHGAP20/ARHGAP6/ARHGEF17/ARHGEF25/ARHGEF26/ARHGEF37/ARHGEF9/CDON/DLC1/ECT2/FAM13B/FGF10/FOXM1/ITPKB/KANK1/KIF14/LPAR1/MYOC/PLEKHG4B/PSD/RAC3/RACGAP1/RHOB/RHOJ/SLIT2/SPRY1/STARD13/STMN1/TIMP2	33
GO:0072088	nephron epithelium morphogenesis	13/994	75/16992	0.000372678	0.00388833	0.00281901	BCL2/DCHS1/FAT4/FGF2/ILK/KIF26B/LIF/MYC/PBX1/PKD1/PTCH1/SHH/TCF21	13
GO:0033044	regulation of chromosome organization	32/994	288/16992	0.000372748	0.00388833	0.00281901	ATAD2/AURKB/BUB1/BUB1B/CCNB1/CDC45/CDC6/CDCA5/CDT1/CENPE/CENPF/DLGAP5/DNMT3B/DUSP1/FEN1/JDP2/LIF/MAD2L1/MAPK15/MKI67/MYC/MYOCD/NDC80/NEK2/PLK1/RPS6KA5/SETD7/SREBF1/TACC3/TTK/UBE2C/UHRF1	32
GO:0051231	spindle elongation	5/994	12/16992	0.000380002	0.0039558	0.00286792	AURKB/KIF23/KIF4A/PRC1/RACGAP1	5
GO:0032355	response to estradiol	18/994	126/16992	0.000384784	0.00398906	0.00289203	CCL2/CCNA2/CRYAB/CTGF/DNMT3B/DUSP1/ESR1/EZH2/FGF10/IL6/PAM/PCNA/PTCH1/PTGFR/PTGS2/SFRP1/TACR3/WFDC1	18
GO:0090288	negative regulation of cellular response to growth factor stimulus	18/994	126/16992	0.000384784	0.00398906	0.00289203	ABL1/ADGRA2/CHRDL1/DCN/FBN1/GREM2/RBPMS2/SFRP1/SFRP2/SLIT2/SMAD7/SPG20/SPRY1/TGFB1I1/TGFB3/TGFBR2/TGFBR3/THBS1	18
GO:0048144	fibroblast proliferation	14/994	85/16992	0.000388532	0.00401963	0.0029142	AQP1/CCNA2/CCNB1/CDC6/CDKN1A/DDR2/E2F1/ESR1/FGF10/JUN/MYC/PDGFD/PDGFRA/SFRP1	14
GO:0030509	BMP signaling pathway	20/994	148/16992	0.000395812	0.00408653	0.00296271	ABL1/BMP5/CHRDL1/CYR61/EGR1/FBN1/FSTL1/GATA6/GREM2/ILK/RBPMS2/ROR2/RYR2/SFRP1/SFRP2/SMAD7/SPG20/TGFB3/TGFBR3/TMEM100	20
GO:0045687	positive regulation of glial cell differentiation	8/994	32/16992	0.000397813	0.00409878	0.00297158	ASPA/BIN1/CXCR4/ID2/IL6ST/LIF/SHH/ZNF488	8
GO:0045669	positive regulation of osteoblast differentiation	11/994	57/16992	0.000400243	0.00411538	0.00298362	CYR61/DDR2/IL6/IL6ST/ILK/JUND/MEF2C/PDLIM7/SFRP2/TMEM119/ZHX3	11
GO:0032845	negative regulation of homeostatic process	23/994	183/16992	0.00043846	0.00449361	0.00325784	ABL1/AKAP6/ANK2/ATP1A2/BCL2/BDKRB1/CACNA1C/CASQ2/DMD/FGF2/IL6/ITPKB/ITPR1/ITPR3/JPH2/PDE4D/PLN/RYR2/RYR3/SLC8A1/TNFAIP3/TSC22D3/ZFP36	23
GO:0003279	cardiac septum development	15/994	96/16992	0.000438815	0.00449361	0.00325784	ANK2/BMP5/CYR61/GATA6/HAND1/ID2/PARVA/PITX2/SMAD7/SOX4/TBX20/TBX5/TGFBR2/TGFBR3/ZFPM2	15
GO:0048645	animal organ formation	11/994	58/16992	0.000468207	0.00478485	0.00346898	AR/FGF10/FGFR1/GATA6/HAND2/MEF2C/SHH/SOX17/SPRY1/TBX5/TGFBR2	11
GO:0051235	maintenance of location	32/994	292/16992	0.000475117	0.00484561	0.00351303	ABL1/ACACB/AKAP6/ANK2/ASPM/ATP1A2/BDKRB1/C3/CACNA1C/CASQ2/DMD/FBN1/FGF2/FLNA/GSN/HILPDA/IL6/ITPR1/ITPR3/JPH2/PDE4D/PKD1/PLN/RYR2/RYR3/SLC25A23/SLC8A1/SYNE1/THRA/TLN1/TONSL/VSTM2A	32
GO:0061333	renal tubule morphogenesis	13/994	77/16992	0.00048548	0.0049313	0.00357515	BCL2/DCHS1/FAT4/FGF2/ILK/KIF26B/MEF2C/MYC/PBX1/PKD1/PTCH1/SHH/TCF21	13
GO:0072028	nephron morphogenesis	13/994	77/16992	0.00048548	0.0049313	0.00357515	BCL2/DCHS1/FAT4/FGF2/ILK/KIF26B/LIF/MYC/PBX1/PKD1/PTCH1/SHH/TCF21	13
GO:0002042	cell migration involved in sprouting angiogenesis	8/994	33/16992	0.000498472	0.00503276	0.00364871	EGR3/FGF2/KLF4/NR4A1/PTGS2/SLIT2/SRF/STARD13	8
GO:0002931	response to ischemia	8/994	33/16992	0.000498472	0.00503276	0.00364871	BCL2/BVES/CAMK2A/CPEB4/EGR1/FAIM2/NDNF/PER2	8
GO:0045737	positive regulation of cyclin-dependent protein serine/threonine kinase activity	8/994	33/16992	0.000498472	0.00503276	0.00364871	CCNB1/CCND2/CDC6/CKS1B/CKS2/FGF10/PKD1/RGCC	8
GO:0061351	neural precursor cell proliferation	18/994	129/16992	0.000514115	0.0051803	0.00375568	ASPM/BTG2/CDON/DIXDC1/EML1/FGFR1/FLNA/HHIP/ID2/ILK/KIF14/LIMS2/LRRK2/MELK/NES/RACGAP1/SHH/ZEB2	18
GO:1900371	regulation of purine nucleotide biosynthetic process	20/994	151/16992	0.000515234	0.0051812	0.00375633	ADCY5/ADCY9/ADGRD1/ADRB3/AKAP12/AKAP6/CAP2/EDNRA/EDNRB/GNAL/GUCA1C/LPAR1/NPR1/OSTN/PALM/PDE2A/PID1/RAMP1/TIMP2/VIPR2	20
GO:0048705	skeletal system morphogenesis	25/994	209/16992	0.000536589	0.00538516	0.00390421	COL10A1/COL11A1/CSGALNACT1/CTGF/FGFR1/FOXN3/HHIP/MEF2C/MEF2D/MGP/MTHFD1L/PDGFRA/PKD1/RAB23/ROR2/SFRP1/SFRP2/STC1/TBX4/TGFB3/TGFBR2/THRA/TIPARP/WNT9A/ZEB1	25
GO:0034762	regulation of transmembrane transport	42/994	422/16992	0.000538171	0.00539028	0.00390792	ABL1/ACTN2/AHNAK/AKAP6/ANK2/ATP1A2/ATP2B4/BCL2/BDKRB1/CACNA1C/CACNA1H/CACNA2D1/CACNB2/CACNB4/CASQ2/CLIC4/DMD/FHL1/FLNA/FXYD6/FYN/GRIN2D/JPH2/KCNB1/KCND3/KCNE4/KCNMA1/KCNMB1/MEF2C/PDE4B/PDE4D/PLN/RYR2/SCN11A/SCN4B/SCN7A/SLC26A6/SLC8A1/SLMAP/STOM/THBS1/UTRN	42
GO:0007411	axon guidance	26/994	221/16992	0.000541679	0.00541426	0.0039253	BOC/CELSR3/CXCL12/DOK6/DPYSL2/EGR2/EPHA7/EPHB2/ETV4/FYN/GFRA1/LAMA2/LAMB2/MATN2/NCAM1/NFASC/NFIB/NR4A3/NRP2/NRXN1/PDLIM7/PLXNA1/RPS6KA5/SHH/SLIT2/SLIT3	26
GO:0051321	meiotic cell cycle	27/994	233/16992	0.000542718	0.00541426	0.0039253	ASPM/AURKA/BUB1/BUB1B/CCNE1/CDC20/CDK1/CKS2/DUSP1/EXO1/FANCA/FANCD2/H2AFX/HSPA2/LIF/MKI67/NCAPD2/NCAPH/NEK2/P3H4/PLK1/PRKACB/PTTG1/RAD54L/TOP2A/TRIP13/TTK	27
GO:0003299	muscle hypertrophy in response to stress	6/994	19/16992	0.000553779	0.00547033	0.00396595	ATP2B4/ERRFI1/EZH2/GATA6/HDAC4/MEF2C	6
GO:0014829	vascular smooth muscle contraction	6/994	19/16992	0.000553779	0.00547033	0.00396595	ACTA2/CHRM3/EDNRA/EDNRB/P2RX1/SLC8A1	6
GO:0014887	cardiac muscle adaptation	6/994	19/16992	0.000553779	0.00547033	0.00396595	ATP2B4/ERRFI1/EZH2/GATA6/HDAC4/MEF2C	6
GO:0014898	cardiac muscle hypertrophy in response to stress	6/994	19/16992	0.000553779	0.00547033	0.00396595	ATP2B4/ERRFI1/EZH2/GATA6/HDAC4/MEF2C	6
GO:0048745	smooth muscle tissue development	6/994	19/16992	0.000553779	0.00547033	0.00396595	FOXP2/ITGA8/MYLK/SHH/SRF/TIPARP	6
GO:0030808	regulation of nucleotide biosynthetic process	20/994	152/16992	0.000561445	0.00552862	0.00400821	ADCY5/ADCY9/ADGRD1/ADRB3/AKAP12/AKAP6/CAP2/EDNRA/EDNRB/GNAL/GUCA1C/LPAR1/NPR1/OSTN/PALM/PDE2A/PID1/RAMP1/TIMP2/VIPR2	20
GO:0002576	platelet degranulation	18/994	130/16992	0.000564841	0.00552862	0.00400821	A2M/ABCC4/ACTN2/CFD/CLEC3B/CLU/FLNA/MMRN1/P2RX1/PCDH7/PECAM1/SELP/TGFB3/THBS1/TLN1/VCL/VEGFD/VWF	18
GO:0051150	regulation of smooth muscle cell differentiation	7/994	26/16992	0.000565177	0.00552862	0.00400821	FOXF1/MYOCD/PRDM6/RBPMS2/SHH/SRF/ZEB1	7
GO:0061437	renal system vasculature development	7/994	26/16992	0.000565177	0.00552862	0.00400821	ACTA2/CD34/EGR1/PDGFD/PDGFRA/PECAM1/TCF21	7
GO:0061440	kidney vasculature development	7/994	26/16992	0.000565177	0.00552862	0.00400821	ACTA2/CD34/EGR1/PDGFD/PDGFRA/PECAM1/TCF21	7
GO:0090266	regulation of mitotic cell cycle spindle assembly checkpoint	5/994	13/16992	0.000587848	0.0057281	0.00415283	CCNB1/CDT1/DUSP1/MAD2L1/NDC80	5
GO:1903504	regulation of mitotic spindle checkpoint	5/994	13/16992	0.000587848	0.0057281	0.00415283	CCNB1/CDT1/DUSP1/MAD2L1/NDC80	5
GO:0051098	regulation of binding	34/994	321/16992	0.000596798	0.00580407	0.00420791	ABL1/AURKA/AURKB/BCL2/CDCA5/CDON/CDT1/CSF3/E2F1/GREM2/GTSE1/HAND1/HAND2/HDAC4/HJURP/ID2/JUN/KLF4/LIF/LRRK2/MEF2C/MYOCD/NEK2/NES/NFATC4/NME1/PER2/PITX2/PKD1/PLK1/PLN/STMN1/TGFBR3/TRIB3	34
GO:0001707	mesoderm formation	12/994	69/16992	0.000600495	0.00582874	0.0042258	FGFR1/FOXF1/HAND1/INHBA/ITGA8/KLF4/NR4A3/SFRP2/SOX17/SRF/TBX20/WLS	12
GO:0034332	adherens junction organization	17/994	120/16992	0.000609608	0.0059058	0.00428166	ACTN2/ARHGAP6/BCL2/CDH3/CORO1C/DLC1/EPHA3/FERMT2/MYOC/PHLDB2/RASSF8/RCC2/SFRP1/SMAD7/SORBS1/THBS1/VCL	17
GO:0007435	salivary gland morphogenesis	8/994	34/16992	0.000618803	0.00598028	0.00433566	FGF10/FGF7/FGFR1/IL6/NFIB/PLXNA1/SHH/TGFB3	8
GO:0030802	regulation of cyclic nucleotide biosynthetic process	19/994	142/16992	0.000619675	0.00598028	0.00433566	ADCY5/ADCY9/ADGRD1/ADRB3/AKAP12/AKAP6/CAP2/EDNRA/EDNRB/GNAL/GUCA1C/LPAR1/NPR1/OSTN/PALM/PDE2A/RAMP1/TIMP2/VIPR2	19
GO:0097485	neuron projection guidance	26/994	223/16992	0.000621302	0.00598449	0.00433871	BOC/CELSR3/CXCL12/DOK6/DPYSL2/EGR2/EPHA7/EPHB2/ETV4/FYN/GFRA1/LAMA2/LAMB2/MATN2/NCAM1/NFASC/NFIB/NR4A3/NRP2/NRXN1/PDLIM7/PLXNA1/RPS6KA5/SHH/SLIT2/SLIT3	26
GO:0010632	regulation of epithelial cell migration	22/994	176/16992	0.000623176	0.00599107	0.00434348	ADGRA2/AMOTL1/CORO1C/DCN/FGF10/FGF2/FGF7/FGFR1/GLIPR2/HBEGF/JUN/KLF4/NRP2/PLPP3/PTGS2/RGCC/RHOB/SLIT2/STARD13/STC1/TGFBR2/THBS1	22
GO:0060191	regulation of lipase activity	13/994	79/16992	0.000625933	0.00600609	0.00435437	ABL1/AGTR1/APOC1/CYR61/EDNRA/ESR1/FGF2/FGFR1/GPIHBP1/LPAR1/PDGFRA/PLA2G5/RGS2	13
GO:0010517	regulation of phospholipase activity	11/994	60/16992	0.000633298	0.00606518	0.00439721	ABL1/AGTR1/CYR61/EDNRA/ESR1/FGF2/FGFR1/LPAR1/PDGFRA/PLA2G5/RGS2	11
GO:0010812	negative regulation of cell-substrate adhesion	10/994	51/16992	0.000638092	0.00609948	0.00442208	ARHGAP6/CORO1C/DLC1/FZD7/KANK1/MYOC/PHLDB2/RCC2/SEMA3E/THBS1	10
GO:0010639	negative regulation of organelle organization	34/994	323/16992	0.000666622	0.00636011	0.00461103	ARHGAP6/ATAD2/BUB1/BUB1B/C16orf45/CCNB1/CDT1/CENPF/CLIP3/CLU/DLC1/DNMT3B/DUSP1/GSN/KANK1/LIF/LMOD1/LMOD3/LRRK2/MAD2L1/MAPT/MYADM/MYOC/NDC80/NEK2/PHLDB2/PID1/PLK1/RGCC/S1PR1/SLIT2/STMN1/TMOD1/TTK	34
GO:0051051	negative regulation of transport	44/994	453/16992	0.000669619	0.00637659	0.00462298	ACTN2/APOC1/ATP1A2/BCL2/CASQ2/CD34/CRYAB/DACT3/FOXF1/GNAO1/IL6/INHBA/KCNB1/LIF/LRRC32/LRRK2/MAOB/MAP1B/OSTN/PDE2A/PID1/PKD1/PKDCC/PKIG/PLN/PRKCB/PTGER3/PTGER4/PTGS2/RAB23/RAP1A/RGCC/SFRP1/SHH/SOX4/SREBF1/SSC5D/STC1/SYT11/TACR2/THBS1/THRA/TONSL/WWTR1	44
GO:0032147	activation of protein kinase activity	32/994	298/16992	0.000675315	0.00641869	0.0046535	ABL1/ADAM8/ADCY5/ADCY9/AKAP13/CDK1/CSPG4/CXCR4/DUSP5/ECT2/FGF10/FGF2/GADD45B/GHR/IQGAP3/ITGA1/KIF14/LPAR1/LRRK2/MAP3K20/MAP3K8/NCKAP1L/NTRK3/PRKACB/PRKAG2/PRKAR2B/RAP1A/RGCC/TGFB3/TGFBR2/THBS1/TPX2	32
GO:0007612	learning	18/994	132/16992	0.00067934	0.00644476	0.0046724	ADGRB3/ATP1A2/BCHE/BTG2/CLDN5/EPHB2/FOS/FOSL1/FOXP2/FYN/JUN/MEIS2/NRXN1/PRKAR2B/PTGS2/SRF/SYNPO/TACR2	18
GO:0007265	Ras protein signal transduction	34/994	324/16992	0.000704161	0.00666012	0.00482854	AGTR1/AKAP13/ARHGAP6/ARHGEF17/ARHGEF25/ARHGEF26/ARHGEF37/ARHGEF9/CCNA2/CDC42EP3/CDKN1A/DLC1/ECT2/FGF10/FGF2/FOXM1/IQGAP3/ITPKB/JUN/KANK1/KIF14/LPAR1/MRAS/MYOC/PLEKHG4B/PSD/RAP1A/RASGRP2/RHOB/RHOJ/RTKN/SPRY1/STMN1/TIMP2	34
GO:0022617	extracellular matrix disassembly	14/994	90/16992	0.000704691	0.00666012	0.00482854	A2M/ADAM8/ADAMTS4/CMA1/CTSG/DCN/DDR2/ELN/FBN1/FSCN1/HSPG2/MMP11/TIMP2/TPSAB1	14
GO:0045599	negative regulation of fat cell differentiation	9/994	43/16992	0.000718605	0.00677888	0.00491464	E2F1/IL6/JDP2/MMP11/RUNX1T1/TGFB1I1/TRIB3/WWTR1/ZFPM2	9
GO:0032886	regulation of microtubule-based process	20/994	155/16992	0.000722257	0.00678786	0.00492115	ABL1/AURKA/C16orf45/CLIP3/DIXDC1/EPHA3/KIF11/MAPT/NEK2/PHLDB2/PKD1/PLK1/RANBP3L/RGS2/SKA1/SKA3/STIL/STMN1/TACC3/TPX2	20
GO:0046058	cAMP metabolic process	20/994	155/16992	0.000722257	0.00678786	0.00492115	ADCY5/ADCY9/ADGRD1/ADRB3/AKAP12/AKAP6/CAP2/EDNRA/EDNRB/GNAL/LPAR1/PALM/PDE1A/PDE2A/PDE4B/PDE4D/PDE7B/RAMP1/TIMP2/VIPR2	20
GO:1902893	regulation of pri-miRNA transcription from RNA polymerase II promoter	7/994	27/16992	0.000724839	0.00679942	0.00492953	FOS/HDAC4/JUN/NFATC4/NFIB/SRF/TEAD1	7
GO:0045766	positive regulation of angiogenesis	17/994	122/16992	0.000738602	0.00691562	0.00501378	AQP1/C3/CD34/CMA1/FGF2/GATA6/HSPB6/ITGA5/PRKCB/PTGIS/PTGS2/RHOB/SFRP2/TGFBR2/THBS1/TNFSF12/VEGFD	17
GO:0001508	action potential	18/994	133/16992	0.000743704	0.00693756	0.00502968	AKAP6/ANK2/ATP1A2/CACNA1C/CACNA1H/CACNA2D1/CACNB2/DMD/FLNA/KCNB1/KCND3/P2RX1/RYR2/SCN11A/SCN4B/SCN7A/SLC8A1/SLMAP	18
GO:0050880	regulation of blood vessel size	18/994	133/16992	0.000743704	0.00693756	0.00502968	ACTA2/ADRB3/AGTR1/ATP1A2/BDKRB2/CHRM3/EDNRA/EDNRB/EPHX2/ITGA1/KCNMB1/NPR1/P2RX1/PER2/PRKG1/PTGS2/RGS2/SLC8A1	18
GO:0003229	ventricular cardiac muscle tissue development	10/994	52/16992	0.000749245	0.00695268	0.00504064	COL11A1/HAND1/ID2/RYR2/SMAD7/TBX5/TGFBR3/TNNT2/TPM1/ZFPM2	10
GO:0014912	negative regulation of smooth muscle cell migration	6/994	20/16992	0.000752239	0.00695268	0.00504064	IGFBP5/ILK/MYOCD/SLIT2/TPM1/TRIB1	6
GO:0051497	negative regulation of stress fiber assembly	6/994	20/16992	0.000752239	0.00695268	0.00504064	ARHGAP6/DLC1/MYOC/PHLDB2/S1PR1/STMN1	6
GO:1901889	negative regulation of cell junction assembly	6/994	20/16992	0.000752239	0.00695268	0.00504064	ARHGAP6/CORO1C/DLC1/PHLDB2/RCC2/THBS1	6
GO:1903429	regulation of cell maturation	6/994	20/16992	0.000752239	0.00695268	0.00504064	AURKA/BCL2/EDNRB/KIF14/LRRK2/RAC3	6
GO:0003179	heart valve morphogenesis	8/994	35/16992	0.000761521	0.00699986	0.00507485	CYR61/DCHS1/MEF2C/OLFM1/SOX4/TBX20/TBX5/TGFBR2	8
GO:0010464	regulation of mesenchymal cell proliferation	8/994	35/16992	0.000761521	0.00699986	0.00507485	FGFR1/FOXF1/FOXP2/MYC/NFIB/SHH/TGFBR2/ZEB1	8
GO:0016572	histone phosphorylation	8/994	35/16992	0.000761521	0.00699986	0.00507485	AURKA/AURKB/CCNA2/CCNB1/CDK1/PRKAA2/PRKCB/RPS6KA5	8
GO:0070371	ERK1 and ERK2 cascade	29/994	263/16992	0.000776445	0.00712402	0.00516487	ABL1/ATF3/CCL14/CCL2/CNKSR3/CTGF/CYR61/DUSP1/EPHA7/ERRFI1/FGF10/FGF2/GLIPR2/GPR183/HAND2/IL6/IQGAP3/JUN/KLF4/LIF/LMO3/MYC/PDGFD/PDGFRA/PLA2G5/PTGER4/RAP1A/SPRY1/TNFAIP8L3	29
GO:0048332	mesoderm morphogenesis	12/994	71/16992	0.000783341	0.00716745	0.00519635	FGFR1/FOXF1/HAND1/INHBA/ITGA8/KLF4/NR4A3/SFRP2/SOX17/SRF/TBX20/WLS	12
GO:0052652	cyclic purine nucleotide metabolic process	20/994	156/16992	0.000784029	0.00716745	0.00519635	ADCY5/ADCY9/ADGRD1/ADRB3/AKAP12/AKAP6/AQP1/CAP2/EDNRA/EDNRB/GNAL/GUCA1C/LPAR1/NPR1/OSTN/PALM/PDE2A/RAMP1/TIMP2/VIPR2	20
GO:0051153	regulation of striated muscle cell differentiation	14/994	91/16992	0.00078889	0.00719738	0.00521805	AKAP13/AKAP6/BCL2/DMPK/EHD2/EZH2/FZD7/HDAC4/MEF2C/MYOCD/NFATC2/SHH/SIK1/THRA	14
GO:0016055	Wnt signaling pathway	45/994	470/16992	0.000790166	0.00719738	0.00521805	ABL1/AMOTL1/ASPM/CALCOCO1/CAMK2A/CCNE1/CDH3/CELSR3/DACT3/DIXDC1/EGR1/FERMT2/FGF10/FZD7/GNAO1/GPC6/HIC1/ILK/KANK1/KLF4/LATS2/LRRK2/MYC/MYOC/NFATC1/NFATC4/NR4A2/PITX2/PLPP3/PRICKLE2/PRKAA2/ROR1/ROR2/RYR2/SFRP1/SFRP2/SHH/SOX17/SOX4/TBL1X/TGFB1I1/WLS/WNT9A/WW	45
GO:0003014	renal system process	16/994	112/16992	0.000794783	0.00722635	0.00523905	ADCY5/ADCY9/AGTR1/AQP1/BCL2/CD34/EDNRB/GSN/JCHAIN/KCNMA1/MCAM/NPR1/PRKACB/PRKAR2B/SGK1/STC1	16
GO:0031145	anaphase-promoting complex-dependent catabolic process	13/994	81/16992	0.000799193	0.00725332	0.00525861	AURKA/AURKB/BUB1B/C2orf40/CCNB1/CDC20/CDK1/MAD2L1/PLK1/PTTG1/SKP2/UBE2C/UBE2S	13
GO:0071901	negative regulation of protein serine/threonine kinase activity	17/994	123/16992	0.000811406	0.0073509	0.00532935	ABL1/CDKN1A/DUSP1/DUSP2/DUSP5/HIPK3/LATS2/MYOCD/PKIG/PLK1/PRKAG2/PRKAR2B/RGS2/SFRP1/SFRP2/SPRY1/TNFAIP3	17
GO:0035150	regulation of tube size	18/994	134/16992	0.000813229	0.00735416	0.00533171	ACTA2/ADRB3/AGTR1/ATP1A2/BDKRB2/CHRM3/EDNRA/EDNRB/EPHX2/ITGA1/KCNMB1/NPR1/P2RX1/PER2/PRKG1/PTGS2/RGS2/SLC8A1	18
GO:0198738	cell-cell signaling by wnt	45/994	471/16992	0.000825749	0.00745398	0.00540408	ABL1/AMOTL1/ASPM/CALCOCO1/CAMK2A/CCNE1/CDH3/CELSR3/DACT3/DIXDC1/EGR1/FERMT2/FGF10/FZD7/GNAO1/GPC6/HIC1/ILK/KANK1/KLF4/LATS2/LRRK2/MYC/MYOC/NFATC1/NFATC4/NR4A2/PITX2/PLPP3/PRICKLE2/PRKAA2/ROR1/ROR2/RYR2/SFRP1/SFRP2/SHH/SOX17/SOX4/TBL1X/TGFB1I1/WLS/WNT9A/WW	45
GO:0009190	cyclic nucleotide biosynthetic process	20/994	157/16992	0.000850298	0.00766183	0.00555477	ADCY5/ADCY9/ADGRD1/ADRB3/AKAP12/AKAP6/AQP1/CAP2/EDNRA/EDNRB/GNAL/GUCA1C/LPAR1/NPR1/OSTN/PALM/PDE2A/RAMP1/TIMP2/VIPR2	20
GO:0009314	response to radiation	42/994	432/16992	0.000861938	0.00775281	0.00562073	AQP1/ATP1A2/AURKB/BCL2/CCL2/CCND2/CDKN1A/CRY2/CRYAB/CXCL12/DCUN1D3/DNMT3B/DTL/DUSP1/ECT2/EGR1/FANCD2/FEN1/FOS/GUCA1C/H2AFX/HIST3H2A/ID2/JUN/JUNB/JUND/MAP3K20/MEIS2/MFAP4/MYC/NFATC4/PCLAF/PCNA/PER1/POLD1/PTGS2/RAD54L/RHOB/SFRP1/SFRP2/SIK1/SYNPO	42
GO:0007076	mitotic chromosome condensation	5/994	14/16992	0.000870583	0.00780266	0.00565687	CDCA5/NCAPD2/NCAPG/NCAPH/NUSAP1	5
GO:0060973	cell migration involved in heart development	5/994	14/16992	0.000870583	0.00780266	0.00565687	BVES/DCHS1/HAND2/PITX2/TBX5	5
GO:0007229	integrin-mediated signaling pathway	14/994	92/16992	0.000881426	0.00788579	0.00571714	ADAMTS1/CTGF/FERMT2/FLNA/ILK/ITGA1/ITGA5/ITGA7/ITGA8/ITGA9/LIMS2/PLP1/RCC2/TLN1	14
GO:0007422	peripheral nervous system development	12/994	72/16992	0.000890906	0.00795644	0.00576836	CDK1/EDNRB/EGR2/EGR3/HAND2/ILK/LAMA2/LAMB2/LGI4/MYOC/NFASC/PMP22	12
GO:0021955	central nervous system neuron axonogenesis	7/994	28/16992	0.000918175	0.00818543	0.00593438	ADARB1/DCLK1/EPHB2/NFIB/NR4A2/SLIT2/ZEB2	7
GO:0034765	regulation of ion transmembrane transport	40/994	407/16992	0.00092105	0.00819653	0.00594243	ABL1/ACTN2/AHNAK/AKAP6/ANK2/ATP1A2/ATP2B4/BDKRB1/CACNA1C/CACNA1H/CACNA2D1/CACNB2/CACNB4/CASQ2/CLIC4/DMD/FHL1/FLNA/FXYD6/FYN/GRIN2D/JPH2/KCNB1/KCND3/KCNE4/KCNMA1/KCNMB1/MEF2C/PDE4B/PDE4D/PLN/RYR2/SCN11A/SCN4B/SCN7A/SLC8A1/SLMAP/STOM/THBS1/UTRN	40
GO:0032964	collagen biosynthetic process	8/994	36/16992	0.000929544	0.00825751	0.00598663	CCL2/CTGF/CYGB/ERRFI1/IL6/RAP1A/RGCC/TGFB3	8
GO:0043406	positive regulation of MAP kinase activity	25/994	217/16992	0.000931585	0.00826104	0.0059892	ADAM8/AKAP13/CDK1/CSPG4/CXCR4/DUSP5/EZH2/FGF10/FGF2/FGFR1/GHR/ILK/IQGAP3/ITGA1/LPAR1/LRRK2/MAP3K20/NTRK3/PDE5A/PDGFD/ROR2/TGFB3/THBS1/TPD52L1/ZEB2	25
GO:0007389	pattern specification process	41/994	421/16992	0.000955695	0.00845992	0.00613338	AR/AURKA/BMP5/BTG2/CC2D2A/CDON/DAAM2/DCHS1/EGR2/ETS2/FGF10/FGFR1/FOXF1/GREM2/HAND1/HAND2/HHIP/MEF2C/MEOX1/PBX1/PITX2/PRKACB/PTCH1/ROR2/SFRP1/SFRP2/SHH/SHROOM3/SIM2/SOX17/SPRY1/SRF/STC1/STIL/TBX20/TBX5/TGFBR2/WLS/ZBTB16/ZEB1/ZEB2	41
GO:0045981	positive regulation of nucleotide metabolic process	18/994	136/16992	0.0009691	0.00853859	0.00619041	ADCY5/ADCY9/ADGRD1/ADRB3/AKAP12/CAP2/CCNB1/CDK1/EDNRA/GNAL/GUCA1C/NPR1/OSTN/PID1/PRKAA2/RAMP1/TIMP2/VIPR2	18
GO:1900544	positive regulation of purine nucleotide metabolic process	18/994	136/16992	0.0009691	0.00853859	0.00619041	ADCY5/ADCY9/ADGRD1/ADRB3/AKAP12/CAP2/CCNB1/CDK1/EDNRA/GNAL/GUCA1C/NPR1/OSTN/PID1/PRKAA2/RAMP1/TIMP2/VIPR2	18
GO:0032835	glomerulus development	11/994	63/16992	0.000969676	0.00853859	0.00619041	ACTA2/BCL2/CD34/EGR1/LAMB2/MEF2C/PDGFD/PDGFRA/PECAM1/TCF21/WWTR1	11
GO:2000241	regulation of reproductive process	17/994	125/16992	0.000975532	0.00857513	0.00621691	AR/ASPM/AURKA/CACNA1H/CDC20/CDK1/DUSP1/EDNRB/ESR1/INHBA/LIF/PDE5A/PRKACB/SFRP1/SHH/TTK/ZFPM2	17
GO:0045446	endothelial cell differentiation	14/994	93/16992	0.000982941	0.00862518	0.00625319	APOLD1/ARHGEF26/CLDN5/CLIC4/MYADM/PDE2A/PDE4D/RAP1A/S1PR1/SCUBE1/SOX17/STC1/TMEM100/ZEB1	14
GO:0010631	epithelial cell migration	26/994	230/16992	0.000986164	0.00863838	0.00626276	ADGRA2/AMOTL1/CORO1C/DCN/EGR3/FGF10/FGF2/FGF7/FGFR1/GLIPR2/HBEGF/JUN/KLF4/NR4A1/NRP2/PTGS2/RGCC/RHOB/SLIT2/SRF/STARD13/STC1/TGFBR2/THBS1/TNFSF12/ZEB2	26
GO:0001502	cartilage condensation	6/994	21/16992	0.00100145	0.00869652	0.00630491	COL11A1/CTGF/MGP/PKD1/ROR2/THRA	6
GO:0003181	atrioventricular valve morphogenesis	6/994	21/16992	0.00100145	0.00869652	0.00630491	CYR61/DCHS1/OLFM1/SOX4/TBX5/TGFBR2	6
GO:0045932	negative regulation of muscle contraction	6/994	21/16992	0.00100145	0.00869652	0.00630491	ATP1A2/PDE5A/PRKG1/PTGS2/RGS2/TNNT1	6
GO:0051412	response to corticosterone	6/994	21/16992	0.00100145	0.00869652	0.00630491	CDKN1A/FOS/FOSB/FOSL1/MAOB/NTRK3	6
GO:0051984	positive regulation of chromosome segregation	6/994	21/16992	0.00100145	0.00869652	0.00630491	CCNB1/CDC6/CDT1/DLGAP5/FEN1/RCC2	6
GO:0072078	nephron tubule morphogenesis	12/994	73/16992	0.0010105	0.00875998	0.00635092	BCL2/DCHS1/FAT4/FGF2/ILK/KIF26B/MYC/PBX1/PKD1/PTCH1/SHH/TCF21	12
GO:1900182	positive regulation of protein localization to nucleus	17/994	126/16992	0.00106767	0.00923964	0.00669867	AKAP6/C8orf4/CDK1/CSF3/ECT2/FLNA/FYN/GTSE1/IL6/KANK1/LIF/PLK1/PTGS2/RBPMS/SFRP2/SHH/TGFB3	17
GO:0051090	regulation of sequence-specific DNA binding transcription factor activity	37/994	371/16992	0.00108208	0.00934826	0.00677742	ADAM8/AR/ARID5B/CAMK2A/CLU/DDR2/ERC1/ESR1/EZH2/FANCA/FANCD2/FLNA/FOS/FOSL1/HAND1/HAND2/HDAC4/ID2/IL6/JUN/KLF4/LRP8/LRRFIP1/MYOCD/PLPP3/PRKCB/PTCH1/PTGIS/RGCC/RPS6KA5/SGK1/SHH/SIK1/SMAD7/SRF/TNFAIP3/TRIB1	37
GO:1901214	regulation of neuron death	29/994	269/16992	0.00110888	0.00955695	0.00692872	ABL1/ADAM8/BCL2/BTG2/CCL2/CD34/CLU/CPEB4/CSF3/EPHA7/FAIM2/FYN/HDAC4/IL6/ILK/ITGA1/JUN/KCNB1/KIF14/LRRK2/MAPT/MDK/MEF2C/MYBL2/NDNF/NES/NR4A2/NR4A3/TGFB3	29
GO:0060675	ureteric bud morphogenesis	11/994	64/16992	0.00111017	0.00955695	0.00692872	BCL2/DCHS1/FAT4/FGF2/ILK/KIF26B/MYC/PBX1/PTCH1/SHH/TCF21	11
GO:0050920	regulation of chemotaxis	21/994	172/16992	0.00111194	0.00955695	0.00692872	ADGRA2/CCL2/CXCL12/CXCL2/CXCR4/FGF10/FGF2/FGFR1/GPR183/IL6/JAM3/LPAR1/NCKAP1L/NTRK3/PDGFD/PDGFRA/PLXNA1/S1PR1/SLIT2/THBS1/VEGFD	21
GO:0014003	oligodendrocyte development	8/994	37/16992	0.001126	0.00964482	0.00699243	ASPA/CLU/GSN/ID2/LPAR1/PLP1/SHH/ZNF488	8
GO:0032467	positive regulation of cytokinesis	8/994	37/16992	0.001126	0.00964482	0.00699243	AURKB/CDC6/CIT/ECT2/KIF14/KIF23/RACGAP1/SVIL	8
GO:0070613	regulation of protein processing	13/994	84/16992	0.00113342	0.00969193	0.00702658	A2M/ADAM8/BIRC5/C3/C7/CD55/CFH/CLEC3B/GSN/LRRK2/MAGEA3/PRKACB/THBS1	13
GO:0085029	extracellular matrix assembly	7/994	29/16992	0.00114992	0.00981631	0.00711675	FBLN5/MFAP4/MYH11/PHLDB2/RGCC/THSD4/TNXB	7
GO:0031570	DNA integrity checkpoint	20/994	161/16992	0.00116581	0.00993509	0.00720287	AURKA/BTG2/CCNB1/CDC45/CDC6/CDK1/CDKN1A/CDT1/DTL/E2F1/FANCI/FOXN3/GTSE1/H2AFX/MAP3K20/PCNA/PLK1/RGCC/SOX4/TOP2A	20
GO:0045740	positive regulation of DNA replication	10/994	55/16992	0.00118186	0.0100379	0.00727738	BMP5/CDK1/CDT1/FGF10/FGFR1/IL6/JUN/PCNA/PDGFRA/TGFB3	10
GO:0046068	cGMP metabolic process	10/994	55/16992	0.00118186	0.0100379	0.00727738	ADCY5/ADCY9/AQP1/GUCA1C/NPR1/OSTN/PDE1A/PDE2A/PDE5A/THBS1	10
GO:0090132	epithelium migration	26/994	233/16992	0.00119223	0.0101088	0.00732881	ADGRA2/AMOTL1/CORO1C/DCN/EGR3/FGF10/FGF2/FGF7/FGFR1/GLIPR2/HBEGF/JUN/KLF4/NR4A1/NRP2/PTGS2/RGCC/RHOB/SLIT2/SRF/STARD13/STC1/TGFBR2/THBS1/TNFSF12/ZEB2	26
GO:0030514	negative regulation of BMP signaling pathway	9/994	46/16992	0.00119943	0.0101528	0.0073607	ABL1/CHRDL1/FBN1/GREM2/RBPMS2/SFRP1/SFRP2/SMAD7/SPG20	9
GO:0022898	regulation of transmembrane transporter activity	23/994	197/16992	0.00122353	0.0103393	0.00749592	ACTN2/AHNAK/AKAP6/ANK2/ATP1A2/BCL2/CACNA2D1/CACNB2/CACNB4/CASQ2/DMD/FHL1/FXYD6/JPH2/MEF2C/PDE4B/PDE4D/PLN/RYR2/SCN4B/SLMAP/STOM/UTRN	23
GO:0072171	mesonephric tubule morphogenesis	11/994	65/16992	0.00126701	0.0106785	0.00774187	BCL2/DCHS1/FAT4/FGF2/ILK/KIF26B/MYC/PBX1/PTCH1/SHH/TCF21	11
GO:1903317	regulation of protein maturation	13/994	85/16992	0.00126792	0.0106785	0.00774187	A2M/ADAM8/BIRC5/C3/C7/CD55/CFH/CLEC3B/GSN/LRRK2/MAGEA3/PRKACB/THBS1	13
GO:0048562	embryonic organ morphogenesis	30/994	284/16992	0.00127171	0.0106926	0.00775205	COL11A1/EPHB2/FBN1/FGF10/FGFR1/FOXF1/HAND1/HAND2/ID2/ITGA8/MEF2C/MFAP2/MTHFD1L/NR4A3/PDGFRA/PITX2/RBPMS2/ROR2/RYR2/SHH/SOBP/SOX17/SRF/STIL/TBX20/TCF21/TGFB3/TGFBR2/WNT9A/ZEB1	30
GO:0051054	positive regulation of DNA metabolic process	24/994	210/16992	0.00130414	0.0109469	0.00793643	APBB1/AURKB/BMP5/CDK1/CDT1/CHTF18/FGF10/FGFR1/FOXM1/H2AFX/IL6/JUN/KLF4/MAPK15/MYC/NEK2/PARM1/PCNA/PDGFRA/RFC4/RGCC/TGFB3/TIMELESS/TOP2A	24
GO:0009214	cyclic nucleotide catabolic process	6/994	22/16992	0.00130949	0.0109553	0.00794252	PDE1A/PDE2A/PDE4B/PDE4D/PDE5A/PDE7B	6
GO:0098743	cell aggregation	6/994	22/16992	0.00130949	0.0109553	0.00794252	COL11A1/CTGF/MGP/PKD1/ROR2/THRA	6
GO:0034599	cellular response to oxidative stress	27/994	247/16992	0.00131866	0.0110136	0.00798479	ABL1/AQP1/BCL2/CCNA2/CDK1/CPEB2/ECT2/EZH2/FANCD2/FBLN5/FOS/IL6/JUN/KLF2/KLF4/LRRK2/MELK/NR4A2/NR4A3/PCNA/PDGFD/PDGFRA/PYCR1/RHOB/SOD3/TNFAIP3/TPM1	27
GO:0001952	regulation of cell-matrix adhesion	14/994	96/16992	0.00134826	0.0112422	0.00815054	ARHGAP6/BCL2/CORO1C/DLC1/EPHA3/ILK/MYOC/PHLDB2/PLAU/RCC2/SEMA3E/SFRP1/THBS1/UTRN	14
GO:0007431	salivary gland development	8/994	38/16992	0.0013542	0.011273	0.00817286	FGF10/FGF7/FGFR1/IL6/NFIB/PLXNA1/SHH/TGFB3	8
GO:0045685	regulation of glial cell differentiation	10/994	56/16992	0.00136472	0.0113231	0.00820915	ASPA/BIN1/CDK1/CXCR4/ID2/IL6ST/LIF/NTRK3/SHH/ZNF488	10
GO:0061005	cell differentiation involved in kidney development	10/994	56/16992	0.00136472	0.0113231	0.00820915	ACTA2/CD34/FAT4/LAMB2/LIF/MEF2C/PTCH1/SHH/TCF21/WWTR1	10
GO:0001701	in utero embryonic development	32/994	311/16992	0.00137869	0.0114202	0.00827954	AR/BMP5/CCNB1/CCNB2/CYR61/EDNRA/FGFR1/FOSL1/FOXF1/GATA6/GINS1/HAND1/HAND2/JUNB/KLF2/LATS2/LIF/MAFF/NCAPG2/NEK2/PITX2/PKD1/PTCH1/SOCS3/SOX17/SRF/STIL/TGFB3/TGFBR2/TMEM100/TPM1/ZFPM2	32
GO:0030810	positive regulation of nucleotide biosynthetic process	15/994	107/16992	0.00139074	0.0114751	0.00831938	ADCY5/ADCY9/ADGRD1/ADRB3/AKAP12/CAP2/EDNRA/GNAL/GUCA1C/NPR1/OSTN/PID1/RAMP1/TIMP2/VIPR2	15
GO:1900373	positive regulation of purine nucleotide biosynthetic process	15/994	107/16992	0.00139074	0.0114751	0.00831938	ADCY5/ADCY9/ADGRD1/ADRB3/AKAP12/CAP2/EDNRA/GNAL/GUCA1C/NPR1/OSTN/PID1/RAMP1/TIMP2/VIPR2	15
GO:0032409	regulation of transporter activity	24/994	211/16992	0.00139217	0.0114751	0.00831938	ACTN2/AHNAK/AKAP6/ANK2/ATP1A2/BCL2/CACNA2D1/CACNB2/CACNB4/CASQ2/DMD/FHL1/FXYD6/JPH2/MEF2C/PDE4B/PDE4D/PLN/RYR2/SCN4B/SGK1/SLMAP/STOM/UTRN	24
GO:0006323	DNA packaging	23/994	199/16992	0.00140122	0.0115308	0.00835976	ASF1B/CCNB1/CDCA5/CDK1/CENPA/CENPU/CHAF1B/H2AFX/HELLS/HIST1H1C/HIST1H2BD/HIST1H2BK/HIST2H2BE/HJURP/KNL1/MCM2/NCAPD2/NCAPG/NCAPG2/NCAPH/NUSAP1/TOP2A/TSPYL2	23
GO:0045123	cellular extravasation	9/994	47/16992	0.00140778	0.0115659	0.0083852	ADAM8/CCL2/CXCL12/ITGA1/PDGFD/PECAM1/PODXL2/PTGER4/SELP	9
GO:0010762	regulation of fibroblast migration	7/994	30/16992	0.00142512	0.0116893	0.00847463	CORO1C/CYGB/DDR2/FGF2/RCC2/SLC8A1/THBS1	7
GO:0097305	response to alcohol	22/994	188/16992	0.00150014	0.0122845	0.0089062	ACTC1/CCL2/CDK1/CSF3/FYN/GSN/INHBA/KCNMB1/KLF2/KLF4/LRP8/MAOB/NTRK3/PRKAA2/PTCH1/PTGER4/SETD7/SFRP1/SLC2A4/TGFBR2/TGFBR3/TYMS	22
GO:0021987	cerebral cortex development	15/994	108/16992	0.00152975	0.0125066	0.0090672	ASPM/C16orf45/CDON/DIXDC1/FAT4/FLNA/FOXP2/H2AFX/KIF14/LRP8/MDK/SLIT2/TACC1/TACC2/TACC3	15
GO:0051494	negative regulation of cytoskeleton organization	16/994	119/16992	0.00153432	0.0125236	0.00907955	ARHGAP6/C16orf45/CLIP3/DLC1/GSN/KANK1/LMOD1/LMOD3/MYADM/MYOC/NEK2/PHLDB2/S1PR1/SLIT2/STMN1/TMOD1	16
GO:0031532	actin cytoskeleton reorganization	13/994	87/16992	0.00157692	0.0128505	0.00931654	ABL1/CDC42BPA/CSF3/FGF10/FGF7/FLNA/FRY/GSN/NTRK3/PARVA/PDGFRA/S1PR1/SEMA3E	13
GO:0006270	DNA replication initiation	8/994	39/16992	0.00161766	0.0131187	0.00951096	CCNE1/CDC45/CDC6/CDT1/MCM10/MCM2/MCM4/ORC6	8
GO:0010596	negative regulation of endothelial cell migration	8/994	39/16992	0.00161766	0.0131187	0.00951096	DCN/FGF2/KLF4/RGCC/SLIT2/STARD13/STC1/THBS1	8
GO:0010718	positive regulation of epithelial to mesenchymal transition	8/994	39/16992	0.00161766	0.0131187	0.00951096	EZH2/GLIPR2/OLFM1/RGCC/TGFB1I1/TGFB3/TGFBR2/WWTR1	8
GO:0033762	response to glucagon	9/994	48/16992	0.00164428	0.0132703	0.00962089	ADCY5/ADCY9/CCNA2/GLP2R/GNG11/GNG7/PRKACB/PRKAR2B/SREBF1	9
GO:0035272	exocrine system development	9/994	48/16992	0.00164428	0.0132703	0.00962089	FGF10/FGF7/FGFR1/IL6/NFIB/PLXNA1/SHH/TGFB3/WLS	9
GO:0048641	regulation of skeletal muscle tissue development	9/994	48/16992	0.00164428	0.0132703	0.00962089	BCL2/CDON/HDAC4/KLHL41/MEF2C/MYOCD/SHH/SOX17/TSC22D3	9
GO:0032387	negative regulation of intracellular transport	16/994	120/16992	0.00167658	0.0134688	0.00976475	CRYAB/DACT3/FOXF1/LRRK2/MAP1B/PDE2A/PKD1/PKIG/PLN/RAB23/RAP1A/SOX4/SYT11/THRA/TONSL/WWTR1	16
GO:0042552	myelination	15/994	109/16992	0.0016802	0.0134688	0.00976475	ANK2/ASPA/CLU/CXCR4/EGR2/ILK/JAM3/KIF14/LGI4/LPAR1/MYOC/NFASC/PLP1/PMP22/TSPAN2	15
GO:0071156	regulation of cell cycle arrest	15/994	109/16992	0.0016802	0.0134688	0.00976475	AURKA/BIN1/BTG2/CCNB1/CDK1/CDKN1A/E2F1/FGF10/FOXM1/GATA6/GTSE1/ID2/PCNA/RGCC/SOX4	15
GO:0051882	mitochondrial depolarization	6/994	23/16992	0.00168493	0.0134688	0.00976475	ABL1/BCL2/DCN/IFI6/LRRK2/MYOC	6
GO:0060445	branching involved in salivary gland morphogenesis	6/994	23/16992	0.00168493	0.0134688	0.00976475	FGF10/FGF7/FGFR1/IL6/PLXNA1/SHH	6
GO:0098868	bone growth	6/994	23/16992	0.00168493	0.0134688	0.00976475	BNC2/DDR2/LEPR/OSTN/STC1/TGFBR2	6
GO:0097529	myeloid leukocyte migration	20/994	166/16992	0.00169654	0.01354	0.00981638	ADAM8/CCL14/CCL2/CXCL12/CXCL2/EDNRB/IL6/ITGA1/ITGA9/JAM3/MITF/NCKAP1L/PDE4B/PDE4D/PDGFD/PTGER4/ROR2/SLIT2/THBS1/VEGFD	20
GO:0071897	DNA biosynthetic process	23/994	202/16992	0.00170908	0.0136185	0.0098733	AURKB/CDKN1A/CENPF/CHTF18/CTGF/DTL/DUSP1/EXO1/KLF4/LIG1/MAPK15/MYC/NEK2/PARM1/PCLAF/PCNA/POLD1/POLQ/REV3L/RFC4/RGCC/TK1/TYMS	23
GO:0014874	response to stimulus involved in regulation of muscle adaptation	5/994	16/16992	0.00172207	0.0136355	0.00988564	FBXO32/HDAC4/SGCA/TRIM63/UTRN	5
GO:0051782	negative regulation of cell division	5/994	16/16992	0.00172207	0.0136355	0.00988564	ASPM/AURKB/MYC/ORC6/PTCH1	5
GO:0072224	metanephric glomerulus development	5/994	16/16992	0.00172207	0.0136355	0.00988564	CD34/EGR1/LAMB2/PDGFRA/TCF21	5
GO:0090231	regulation of spindle checkpoint	5/994	16/16992	0.00172207	0.0136355	0.00988564	CCNB1/CDT1/DUSP1/MAD2L1/NDC80	5
GO:0060021	palate development	13/994	88/16992	0.00175338	0.0138616	0.0100496	BNC2/CLDN5/EPHB2/HAND2/INHBA/MEF2C/PKDCC/SHH/TCF21/TGFB3/TGFBR2/TGFBR3/TIPARP	13
GO:2000377	regulation of reactive oxygen species metabolic process	19/994	155/16992	0.00178898	0.0141209	0.0102375	AGTR1/ATP2B4/BCL2/CD34/CDKN1A/CLU/CRYAB/FBLN5/FOXM1/HDAC4/IL6/KLF2/KLF4/MAPT/PID1/PTGIS/PTGS2/TGFBR2/THBS1	19
GO:0071385	cellular response to glucocorticoid stimulus	10/994	58/16992	0.00179945	0.014159	0.0102652	AKAP13/AQP1/CCL2/DNMT3B/ERRFI1/FBXO32/IL6/KLF9/STC1/ZFP36	10
GO:0071478	cellular response to radiation	20/994	167/16992	0.00182424	0.014159	0.0102652	AQP1/AURKB/CCND2/CDKN1A/CRY2/CRYAB/ECT2/EGR1/GUCA1C/H2AFX/HIST3H2A/MFAP4/MYC/NFATC4/PCNA/POLD1/PTGS2/RHOB/SFRP1/SFRP2	20
GO:0032412	regulation of ion transmembrane transporter activity	22/994	191/16992	0.00183879	0.014159	0.0102652	ACTN2/AHNAK/AKAP6/ANK2/ATP1A2/CACNA2D1/CACNB2/CACNB4/CASQ2/DMD/FHL1/FXYD6/JPH2/MEF2C/PDE4B/PDE4D/PLN/RYR2/SCN4B/SLMAP/STOM/UTRN	22
GO:0051495	positive regulation of cytoskeleton organization	22/994	191/16992	0.00183879	0.014159	0.0102652	ACTN2/CDC42EP3/CFL2/CSF3/CTGF/DSTN/GSN/LMOD1/LPAR1/MAPT/MYOC/NCKAP1L/NES/NTRK3/RANBP3L/RGCC/RGS2/SFRP1/SYNPO/SYNPO2/TGFB3/TPM1	22
GO:0014870	response to muscle inactivity	4/994	10/16992	0.00183887	0.014159	0.0102652	FBXO32/HDAC4/SGCA/UTRN	4
GO:0014877	response to muscle inactivity involved in regulation of muscle adaptation	4/994	10/16992	0.00183887	0.014159	0.0102652	FBXO32/HDAC4/SGCA/UTRN	4
GO:0014894	response to denervation involved in regulation of muscle adaptation	4/994	10/16992	0.00183887	0.014159	0.0102652	FBXO32/HDAC4/SGCA/UTRN	4
GO:0032060	bleb assembly	4/994	10/16992	0.00183887	0.014159	0.0102652	EMP1/LPAR1/MYLK/PMP22	4
GO:0051256	mitotic spindle midzone assembly	4/994	10/16992	0.00183887	0.014159	0.0102652	AURKB/KIF23/KIF4A/RACGAP1	4
GO:0051315	attachment of mitotic spindle microtubules to kinetochore	4/994	10/16992	0.00183887	0.014159	0.0102652	CDT1/CENPE/KIF2C/NDC80	4
GO:0061469	regulation of type B pancreatic cell proliferation	4/994	10/16992	0.00183887	0.014159	0.0102652	ERRFI1/NR4A1/NR4A3/SFRP1	4
GO:0072203	cell proliferation involved in metanephros development	4/994	10/16992	0.00183887	0.014159	0.0102652	EGR1/MYC/PTCH1/SHH	4
GO:0086016	AV node cell action potential	4/994	10/16992	0.00183887	0.014159	0.0102652	CACNA1C/CACNB2/RYR2/SCN4B	4
GO:0086027	AV node cell to bundle of His cell signaling	4/994	10/16992	0.00183887	0.014159	0.0102652	CACNA1C/CACNB2/RYR2/SCN4B	4
GO:1902894	negative regulation of pri-miRNA transcription from RNA polymerase II promoter	4/994	10/16992	0.00183887	0.014159	0.0102652	HDAC4/NFATC4/NFIB/SRF	4
GO:1902969	mitotic DNA replication	4/994	10/16992	0.00183887	0.014159	0.0102652	CDC45/FGFR1/GINS1/LIG1	4
GO:0051101	regulation of DNA binding	15/994	110/16992	0.00184282	0.0141677	0.0102715	CDCA5/CDT1/E2F1/HAND1/HAND2/HJURP/ID2/JUN/KLF4/LIF/MYOCD/NEK2/NME1/PER2/PITX2	15
GO:0006979	response to oxidative stress	39/994	409/16992	0.00184598	0.0141704	0.0102734	ABL1/ACOX2/ANGPTL7/AQP1/BCL2/CCNA2/CDK1/CPEB2/CRYAB/CYGB/DUSP1/ECT2/EZH2/FANCD2/FBLN5/FOS/FOSL1/GNAO1/IL6/JUN/KLF2/KLF4/LRRK2/MELK/MSRB3/NR4A2/NR4A3/PCNA/PDGFD/PDGFRA/PTGS1/PTGS2/PYCR1/RBPMS/RHOB/SLC8A1/SOD3/TNFAIP3/TPM1	39
GO:0070997	neuron death	31/994	304/16992	0.00187138	0.0143435	0.0103989	ABL1/ADAM8/ADARB1/BCL2/BTG2/CCL2/CD34/CIT/CLU/CPEB4/CSF3/EPHA7/FAIM2/FYN/HDAC4/IL6/ILK/ITGA1/JUN/KCNB1/KIF14/LRRK2/MAPT/MDK/MEF2C/MYBL2/NDNF/NES/NR4A2/NR4A3/TGFB3	31
GO:0045933	positive regulation of muscle contraction	8/994	40/16992	0.00192008	0.014672	0.0106371	CHRM3/CTGF/MYOCD/PTGS2/RGS2/SRF/TACR2/TACR3	8
GO:0072210	metanephric nephron development	8/994	40/16992	0.00192008	0.014672	0.0106371	CD34/EGR1/KIF26B/LAMB2/LIF/PDGFRA/PKD1/TCF21	8
GO:0006112	energy reserve metabolic process	13/994	89/16992	0.00194584	0.0148463	0.0107635	ADRB3/IL6ST/LEPR/MYC/PER2/PID1/PPP1R1A/PPP1R3B/PRKAG2/PYGB/PYGM/SORBS1/STK40	13
GO:0072330	monocarboxylic acid biosynthetic process	22/994	192/16992	0.00196524	0.0149715	0.0108543	ACACB/ACOX2/APOC1/CH25H/CSPG4/CYP27A1/DCN/FASN/MGLL/OSBPL1A/PDK4/PER2/PLP1/PRKAA2/PRKAG2/PTGDS/PTGIS/PTGS1/PTGS2/SCD/TRIB3/UST	22
GO:0045666	positive regulation of neuron differentiation	32/994	318/16992	0.00197348	0.0150116	0.0108833	APBB1/BCL2/BMP5/CDON/CNTN1/CPEB1/CPNE6/CXCL12/DNMT3B/DPYSL3/ECT2/EPHA3/EZH2/FGFR1/FYN/IL6/ILK/LPAR1/LRP8/MAP1B/MAPT/MEF2C/NDNF/NEGR1/NTRK3/RAP1A/SLIT2/SRF/TCF4/TIMP2/ZEB1/ZEB2	32
GO:0030817	regulation of cAMP biosynthetic process	16/994	122/16992	0.00199445	0.0151482	0.0109823	ADCY5/ADCY9/ADGRD1/ADRB3/AKAP12/AKAP6/CAP2/EDNRA/EDNRB/GNAL/LPAR1/PALM/PDE2A/RAMP1/TIMP2/VIPR2	16
GO:0030804	positive regulation of cyclic nucleotide biosynthetic process	14/994	100/16992	0.00200579	0.0151884	0.0110115	ADCY5/ADCY9/ADGRD1/ADRB3/AKAP12/CAP2/EDNRA/GNAL/GUCA1C/NPR1/OSTN/RAMP1/TIMP2/VIPR2	14
GO:0042752	regulation of circadian rhythm	14/994	100/16992	0.00200579	0.0151884	0.0110115	CREM/CRY2/EZH2/ID2/IL6/KLF10/PER1/PER2/PER3/PRKAA2/PTGDS/SIK1/TIMELESS/TOP2A	14
GO:0010634	positive regulation of epithelial cell migration	15/994	111/16992	0.00201834	0.0152605	0.0110637	ADGRA2/AMOTL1/FGF10/FGF2/FGF7/FGFR1/GLIPR2/HBEGF/JUN/NRP2/PLPP3/PTGS2/RHOB/TGFBR2/THBS1	15
GO:0045927	positive regulation of growth	26/994	242/16992	0.00204853	0.0154655	0.0112124	ACACB/AGRN/AKAP6/BCL2/CCNB1/CDK1/CPNE6/CXCL12/FGF2/FGFR1/GATA6/GHR/HBEGF/ILK/MAP1B/MAPT/MEF2C/NTRK3/SFRP1/SFRP2/SRF/TBX20/TBX5/TGFBR2/TGFBR3/ZFPM2	26
GO:0001658	branching involved in ureteric bud morphogenesis	10/994	59/16992	0.00205534	0.0154704	0.011216	BCL2/DCHS1/FAT4/FGF2/ILK/MYC/PBX1/PTCH1/SHH/TCF21	10
GO:1901992	positive regulation of mitotic cell cycle phase transition	10/994	59/16992	0.00205534	0.0154704	0.011216	CCND2/CDC45/CDC6/CDCA5/CDK1/CDT1/DLGAP5/PBX1/RCC2/UBE2C	10
GO:0045785	positive regulation of cell adhesion	37/994	385/16992	0.00208296	0.0156549	0.0113497	ABI3BP/ADAM8/CCDC80/CCL2/CD55/CXCL12/CYR61/EGR3/FBLN2/FLNA/FOXF1/FYN/IL6/IL6ST/ILK/ITGA5/ITPKB/KIF26B/MAP3K8/MYADM/MYOC/NCKAP1L/NDNF/NR4A3/PLPP3/RAC3/SFRP1/SFRP2/SHH/SMAD7/SMOC2/TGFBR2/TPM1/UNC13D/UTRN/VIT/ZBTB16	37
GO:0048333	mesodermal cell differentiation	7/994	32/16992	0.00212747	0.0159399	0.0115563	FGFR1/FOXF1/INHBA/ITGA8/KLF4/SFRP2/SOX17	7
GO:0051385	response to mineralocorticoid	7/994	32/16992	0.00212747	0.0159399	0.0115563	CDKN1A/CTGF/FOS/FOSB/FOSL1/MAOB/NTRK3	7
GO:0030318	melanocyte differentiation	6/994	24/16992	0.00213673	0.0159399	0.0115563	ADAMTS9/BCL2/EDNRB/MEF2C/MITF/ZEB2	6
GO:0032232	negative regulation of actin filament bundle assembly	6/994	24/16992	0.00213673	0.0159399	0.0115563	ARHGAP6/DLC1/MYOC/PHLDB2/S1PR1/STMN1	6
GO:0072661	protein targeting to plasma membrane	6/994	24/16992	0.00213673	0.0159399	0.0115563	ANK2/KCNB1/MYADM/NFASC/PALM/PTCH1	6
GO:0051149	positive regulation of muscle cell differentiation	13/994	90/16992	0.00215539	0.0160315	0.0116227	ABL1/AKAP6/BCL2/BOC/CDON/EHD2/ILK/MEF2C/MYOCD/NFATC2/RANBP3L/SHH/THRA	13
GO:0061387	regulation of extent of cell growth	13/994	90/16992	0.00215539	0.0160315	0.0116227	ABL1/CXCL12/DPYSL2/EPHA7/ILK/MAP1B/MAPT/NTRK3/OLFM1/PLXNA1/SEMA3G/SPG20/SRF	13
GO:0016331	morphogenesis of embryonic epithelium	18/994	146/16992	0.00218628	0.0162372	0.0117719	ABL1/AR/BMP5/CC2D2A/DLC1/FGF10/HAND1/MTHFD1L/PRKACB/PTCH1/SFRP1/SFRP2/SHH/SHROOM3/SOX4/STIL/TGFB1I1/ZEB2	18
GO:0007272	ensheathment of neurons	15/994	112/16992	0.00220755	0.0163351	0.0118428	ANK2/ASPA/CLU/CXCR4/EGR2/ILK/JAM3/KIF14/LGI4/LPAR1/MYOC/NFASC/PLP1/PMP22/TSPAN2	15
GO:0008366	axon ensheathment	15/994	112/16992	0.00220755	0.0163351	0.0118428	ANK2/ASPA/CLU/CXCR4/EGR2/ILK/JAM3/KIF14/LGI4/LPAR1/MYOC/NFASC/PLP1/PMP22/TSPAN2	15
GO:0010518	positive regulation of phospholipase activity	9/994	50/16992	0.00221244	0.0163351	0.0118428	AGTR1/CYR61/EDNRA/ESR1/FGF2/FGFR1/LPAR1/PDGFRA/PLA2G5	9
GO:0045762	positive regulation of adenylate cyclase activity	9/994	50/16992	0.00221244	0.0163351	0.0118428	ADCY5/ADCY9/ADGRD1/ADRB3/CAP2/EDNRA/GNAL/TIMP2/VIPR2	9
GO:0043523	regulation of neuron apoptotic process	22/994	194/16992	0.00224042	0.0165173	0.011975	ADAM8/BCL2/BTG2/CCL2/CPEB4/EPHA7/FAIM2/FYN/HDAC4/ILK/ITGA1/JUN/KCNB1/KIF14/MDK/MEF2C/MYBL2/NDNF/NES/NR4A2/NR4A3/TGFB3	22
GO:0045668	negative regulation of osteoblast differentiation	8/994	41/16992	0.00226533	0.0166283	0.0120554	HAND2/HDAC4/ID2/IGFBP5/OSTN/PTCH1/RANBP3L/SFRP1	8
GO:0086009	membrane repolarization	8/994	41/16992	0.00226533	0.0166283	0.0120554	AKAP6/ANK2/ATP1A2/CACNA2D1/CASQ2/FLNA/KCND3/SCN4B	8
GO:1902532	negative regulation of intracellular signal transduction	43/994	468/16992	0.00226539	0.0166283	0.0120554	ABL1/ATF3/ATP2B4/BCL2/BDKRB2/CASQ2/CLU/CNKSR3/CXCL12/DCN/DLC1/DUSP1/DUSP2/DUSP5/EPM2A/ERRFI1/ESR1/FOXM1/HIPK3/ITPR1/KANK1/KLF4/LIF/LMO3/LRRK2/MAGEA3/MYADM/MYC/MYOC/PER1/PODN/PRKAA2/PTGS2/RGS2/SFRP1/SFRP2/SLIT2/SOCS3/SPRY1/STMN1/THBS1/TIMP2/TNFAIP3	43
GO:0051402	neuron apoptotic process	24/994	219/16992	0.00229913	0.0168513	0.0122171	ADAM8/ADARB1/BCL2/BTG2/CCL2/CIT/CPEB4/EPHA7/FAIM2/FYN/HDAC4/ILK/ITGA1/JUN/KCNB1/KIF14/MDK/MEF2C/MYBL2/NDNF/NES/NR4A2/NR4A3/TGFB3	24
GO:0010667	negative regulation of cardiac muscle cell apoptotic process	5/994	17/16992	0.00232316	0.016978	0.0123089	HAND2/HSPB6/ILK/MYOCD/SFRP2	5
GO:0070884	regulation of calcineurin-NFAT signaling cascade	5/994	17/16992	0.00232316	0.016978	0.0123089	AKAP6/ATP2B4/LMCD1/RCAN1/RCAN2	5
GO:1904950	negative regulation of establishment of protein localization	23/994	207/16992	0.00235052	0.017153	0.0124358	CD34/DACT3/IL6/KCNB1/LRRC32/LRRK2/MAPT/PDE2A/PID1/PKD1/PKDCC/PKIG/PTGER4/RAB23/RGCC/SFRP1/SOX4/SREBF1/SSC5D/SYT11/THRA/TONSL/WWTR1	23
GO:0043409	negative regulation of MAPK cascade	18/994	147/16992	0.00235878	0.0171883	0.0124614	ABL1/ATF3/CNKSR3/DUSP1/DUSP2/DUSP5/ERRFI1/FOXM1/HIPK3/KLF4/LIF/LMO3/MYC/PER1/RGS2/SFRP1/SFRP2/SPRY1	18
GO:0071103	DNA conformation change	29/994	283/16992	0.00239789	0.017448	0.0126497	ASF1B/CCNB1/CDC45/CDCA5/CDK1/CENPA/CENPU/CHAF1B/GINS1/H2AFX/HELLS/HIST1H1C/HIST1H2BD/HIST1H2BK/HIST2H2BE/HJURP/HMGB3/KNL1/MCM2/MCM4/NCAPD2/NCAPG/NCAPG2/NCAPH/NUSAP1/RAD54L/RECQL4/TOP2A/TSPYL2	29
GO:0030168	platelet activation	19/994	159/16992	0.00240264	0.0174573	0.0126564	CSRP1/DGKB/FLNA/FYN/IL6/ILK/ITPR1/ITPR3/MYL9/P2RX1/PDGFRA/PRKCB/PRKG1/RHOB/SELP/SRF/TLN1/VCL/VWF	19
GO:0060348	bone development	21/994	183/16992	0.00241401	0.0174894	0.0126797	AKAP13/COL10A1/CSGALNACT1/DCHS1/FAT4/FBN1/FOXN3/MEF2C/MEF2D/MEIS1/MYOC/PITX2/PTGER4/RAB23/RANBP3L/SFRP2/SRF/STC1/TGFB3/TGFBR2/TMEM119	21
GO:1901215	negative regulation of neuron death	21/994	183/16992	0.00241401	0.0174894	0.0126797	ADAM8/BCL2/BTG2/CCL2/CD34/CPEB4/CSF3/FAIM2/FYN/IL6/ILK/JUN/KIF14/LRRK2/MDK/MEF2C/NDNF/NES/NR4A2/NR4A3/TGFB3	21
GO:0001764	neuron migration	17/994	136/16992	0.00247104	0.0178512	0.012942	ASPM/CELSR3/CXCL12/DCLK1/FGFR1/FLNA/FYN/MATN2/MEF2C/NDN/NDNF/NR4A2/NTRK3/PITX2/PRKG1/SRF/TBX20	17
GO:0043524	negative regulation of neuron apoptotic process	17/994	136/16992	0.00247104	0.0178512	0.012942	ADAM8/BCL2/BTG2/CCL2/CPEB4/FAIM2/FYN/ILK/JUN/KIF14/MDK/MEF2C/NDNF/NES/NR4A2/NR4A3/TGFB3	17
GO:0032535	regulation of cellular component size	32/994	323/16992	0.00252346	0.0182037	0.0131975	ABL1/ACTN2/AKT3/AQP1/CDC42EP3/CFL2/CIT/CSF3/CXCL12/DPYSL2/DSTN/EPHA7/GSN/ILK/IQGAP3/KANK1/KCNMA1/LMOD1/LMOD3/MAP1B/MAPT/MYADM/NCKAP1L/NTRK3/OLFM1/PLXNA1/PPP1R15A/SEMA3G/SLIT2/SPG20/SRF/TMOD1	32
GO:0007623	circadian rhythm	22/994	196/16992	0.00254757	0.0182888	0.0132592	CREM/CRY2/EGR3/EZH2/ID2/IL6/JUN/JUND/KLF10/KLF9/NFIL3/NTRK3/PER1/PER2/PER3/PRKAA2/PTGDS/SIK1/SREBF1/TIMELESS/TOP2A/TYMS	22
GO:0002011	morphogenesis of an epithelial sheet	9/994	51/16992	0.00254981	0.0182888	0.0132592	BMP5/CYR61/FLNA/GSN/HBEGF/ITGA5/PHLDB2/SRF/TBX20	9
GO:0051893	regulation of focal adhesion assembly	9/994	51/16992	0.00254981	0.0182888	0.0132592	ARHGAP6/CORO1C/DLC1/EPHA3/MYOC/PHLDB2/RCC2/SFRP1/THBS1	9
GO:0090109	regulation of cell-substrate junction assembly	9/994	51/16992	0.00254981	0.0182888	0.0132592	ARHGAP6/CORO1C/DLC1/EPHA3/MYOC/PHLDB2/RCC2/SFRP1/THBS1	9
GO:0006171	cAMP biosynthetic process	16/994	125/16992	0.00256453	0.0183268	0.0132868	ADCY5/ADCY9/ADGRD1/ADRB3/AKAP12/AKAP6/CAP2/EDNRA/EDNRB/GNAL/LPAR1/PALM/PDE2A/RAMP1/TIMP2/VIPR2	16
GO:0003156	regulation of animal organ formation	7/994	33/16992	0.00256605	0.0183268	0.0132868	AR/FGF10/FGFR1/HAND2/SHH/SPRY1/TBX5	7
GO:0051653	spindle localization	7/994	33/16992	0.00256605	0.0183268	0.0132868	ASPM/CENPA/FGF10/NDC80/NUSAP1/SPAG5/SPRY1	7
GO:0001654	eye development	33/994	337/16992	0.00262737	0.0187322	0.0135807	ATP2B4/BCL2/CACNA1C/CC2D2A/CDON/CHRDL1/CLIC4/EPHB2/FBN1/FGF10/FOXP2/INHBA/JUN/KLF4/LAMB2/LAMC3/MEIS1/MEIS2/MFAP2/MYOM1/NES/NTRK3/PDGFRA/PITX2/RHOJ/SHH/SLC25A25/SRF/TGFBR2/TMOD1/WNT9A/ZEB1/ZEB2	33
GO:0014013	regulation of gliogenesis	13/994	92/16992	0.00263026	0.0187322	0.0135807	ASPA/BIN1/C16orf45/CDK1/CXCR4/EZH2/GPR183/ID2/IL6ST/LIF/NTRK3/SHH/ZNF488	13
GO:0002673	regulation of acute inflammatory response	11/994	71/16992	0.00263492	0.0187389	0.0135855	A2M/ADAM8/C3/C7/CD55/CFH/EDNRB/IL6/IL6ST/PTGER3/PTGS2	11
GO:0006977	DNA damage response, signal transduction by p53 class mediator resulting in cell cycle arrest	10/994	61/16992	0.0026549	0.0187663	0.0136054	AURKA/BTG2/CCNB1/CDK1/CDKN1A/E2F1/GTSE1/PCNA/RGCC/SOX4	10
GO:0090101	negative regulation of transmembrane receptor protein serine/threonine kinase signaling pathway	14/994	103/16992	0.00265687	0.0187663	0.0136054	ABL1/CHRDL1/FBN1/GREM2/RBPMS2/SFRP1/SFRP2/SMAD7/SPG20/TBX20/TGFB1I1/TGFB3/TGFBR2/TGFBR3	14
GO:0003254	regulation of membrane depolarization	8/994	42/16992	0.00265744	0.0187663	0.0136054	BCL2/DCN/FHL1/IFI6/LRRK2/MYOC/SLMAP/SMAD7	8
GO:0032570	response to progesterone	8/994	42/16992	0.00265744	0.0187663	0.0136054	CCL2/FOS/FOSB/FOSL1/SREBF1/TGFB3/THBS1/TYMS	8
GO:0046850	regulation of bone remodeling	8/994	42/16992	0.00265744	0.0187663	0.0136054	ADAM8/IL6/LEPR/PDK4/S1PR1/SFRP1/SYT7/TNFAIP3	8
GO:1903533	regulation of protein targeting	30/994	298/16992	0.00266528	0.0187953	0.0136264	AKAP6/C8orf4/CCL2/CDK1/CDKN1A/CSF3/DACT3/ECT2/FLNA/FYN/FZD7/IL6/KANK1/KCNB1/LRRK2/PDE2A/PKD1/PKIG/PTGS2/RAB23/RBPMS/SFRP2/SHH/SREBF1/STOM/TGFB3/THRA/TONSL/UGCG/WWTR1	30
GO:0070372	regulation of ERK1 and ERK2 cascade	26/994	247/16992	0.00272002	0.0191544	0.0138868	ABL1/ATF3/CCL14/CCL2/CNKSR3/CTGF/CYR61/DUSP1/EPHA7/ERRFI1/FGF10/FGF2/GLIPR2/GPR183/HAND2/IL6/JUN/KLF4/LIF/LMO3/PDGFD/PDGFRA/PLA2G5/RAP1A/SPRY1/TNFAIP8L3	26
GO:0043270	positive regulation of ion transport	24/994	222/16992	0.00274959	0.0192235	0.0139369	ABL1/ACTN2/AKAP6/ANK2/BDKRB1/CACNA2D1/CACNB2/CAMK2A/CCL2/CNKSR3/CNTN1/CXCL12/DMD/FHL1/FLNA/JPH2/KCNMB1/MYLK/P2RX1/PRSS8/RYR2/SCN4B/STC1/TACR2	24
GO:0014041	regulation of neuron maturation	4/994	11/16992	0.00275659	0.0192235	0.0139369	BCL2/EDNRB/LRRK2/RAC3	4
GO:0019371	cyclooxygenase pathway	4/994	11/16992	0.00275659	0.0192235	0.0139369	PTGDS/PTGIS/PTGS1/PTGS2	4
GO:0048711	positive regulation of astrocyte differentiation	4/994	11/16992	0.00275659	0.0192235	0.0139369	BIN1/ID2/IL6ST/LIF	4
GO:0051255	spindle midzone assembly	4/994	11/16992	0.00275659	0.0192235	0.0139369	AURKB/KIF23/KIF4A/RACGAP1	4
GO:0086067	AV node cell to bundle of His cell communication	4/994	11/16992	0.00275659	0.0192235	0.0139369	CACNA1C/CACNB2/RYR2/SCN4B	4
GO:1990000	amyloid fibril formation	4/994	11/16992	0.00275659	0.0192235	0.0139369	CLU/CRYAB/GSN/MAPT	4
GO:0009408	response to heat	19/994	161/16992	0.00277039	0.019293	0.0139873	BAG2/C8orf4/CAMK2A/CCL2/CD34/CDKN1A/CRYAB/CXCL12/DNAJB4/HSPA2/HSPB8/IL6/MAPT/MKI67/NUP210/PTGS2/SCARA5/TGFB1I1/THBS1	19
GO:2001257	regulation of cation channel activity	16/994	126/16992	0.00278226	0.0193488	0.0140278	ACTN2/AHNAK/AKAP6/ANK2/CACNA2D1/CACNB2/CACNB4/CASQ2/DMD/JPH2/MEF2C/PDE4B/PDE4D/PLN/SLMAP/STOM	16
GO:0030510	regulation of BMP signaling pathway	12/994	82/16992	0.00281365	0.0195401	0.0141664	ABL1/CHRDL1/CYR61/FBN1/GATA6/GREM2/ILK/RBPMS2/SFRP1/SFRP2/SMAD7/SPG20	12
GO:0006275	regulation of DNA replication	15/994	115/16992	0.00286547	0.0198725	0.0144074	BMP5/CDC6/CDK1/CDT1/CHTF18/FGF10/FGFR1/IL6/JUN/PCNA/PDGFRA/PID1/RFC4/TGFB3/TSPYL2	15
GO:0030814	regulation of cAMP metabolic process	17/994	138/16992	0.00288528	0.0199823	0.0144871	ADCY5/ADCY9/ADGRD1/ADRB3/AKAP12/AKAP6/CAP2/EDNRA/EDNRB/GNAL/LPAR1/PALM/PDE2A/PDE4D/RAMP1/TIMP2/VIPR2	17
GO:0032233	positive regulation of actin filament bundle assembly	9/994	52/16992	0.00292667	0.0202133	0.0146545	CTGF/LPAR1/MYOC/RGCC/SFRP1/SYNPO/SYNPO2/TGFB3/TPM1	9
GO:0048747	muscle fiber development	9/994	52/16992	0.00292667	0.0202133	0.0146545	BCL2/DMD/FLNC/HDAC4/KLHL41/LMOD3/MYH11/NEXN/SGCB	9
GO:0071496	cellular response to external stimulus	28/994	274/16992	0.00293556	0.0202469	0.0146788	AQP1/ATF3/ATP1A2/BCL2/CDKN1A/CPEB4/FOS/FOSL1/HDAC4/IL6/JUN/KANK2/KCNB1/KLF10/LRRK2/MYOCD/NR4A2/PDE2A/PDK4/PRKAA2/PTGER4/PTGS2/SFRP1/SFRP2/SKP2/SLC39A4/SREBF1/SRF	28
GO:0051881	regulation of mitochondrial membrane potential	10/994	62/16992	0.00300312	0.0205998	0.0149347	ABL1/BCL2/DCN/IFI6/LRRK2/MAPT/MYOC/PID1/PYCR1/SPG20	10
GO:0071384	cellular response to corticosteroid stimulus	10/994	62/16992	0.00300312	0.0205998	0.0149347	AKAP13/AQP1/CCL2/DNMT3B/ERRFI1/FBXO32/IL6/KLF9/STC1/ZFP36	10
GO:0072431	signal transduction involved in mitotic G1 DNA damage checkpoint	10/994	62/16992	0.00300312	0.0205998	0.0149347	AURKA/BTG2/CCNB1/CDK1/CDKN1A/E2F1/GTSE1/PCNA/RGCC/SOX4	10
GO:1902400	intracellular signal transduction involved in G1 DNA damage checkpoint	10/994	62/16992	0.00300312	0.0205998	0.0149347	AURKA/BTG2/CCNB1/CDK1/CDKN1A/E2F1/GTSE1/PCNA/RGCC/SOX4	10
GO:0014741	negative regulation of muscle hypertrophy	5/994	18/16992	0.00306341	0.0207533	0.015046	ATP2B4/ERRFI1/IGFBP5/RGS2/TRIM63	5
GO:0033622	integrin activation	5/994	18/16992	0.00306341	0.0207533	0.015046	FERMT2/KIF14/PTGER4/SELP/TLN1	5
GO:0051383	kinetochore organization	5/994	18/16992	0.00306341	0.0207533	0.015046	CDT1/CENPA/CENPE/CENPF/NDC80	5
GO:0055012	ventricular cardiac muscle cell differentiation	5/994	18/16992	0.00306341	0.0207533	0.015046	CCNB1/CDK1/MEF2C/MYOCD/PITX2	5
GO:0060055	angiogenesis involved in wound healing	5/994	18/16992	0.00306341	0.0207533	0.015046	CD34/MCAM/NDNF/SRF/TNFAIP3	5
GO:0070633	transepithelial transport	5/994	18/16992	0.00306341	0.0207533	0.015046	AQP1/EDNRB/ITPR1/RHBG/SLC26A6	5
GO:0014037	Schwann cell differentiation	7/994	34/16992	0.00307089	0.0207533	0.015046	CDK1/EGR2/ILK/LAMA2/LAMB2/LGI4/MYOC	7
GO:0017145	stem cell division	7/994	34/16992	0.00307089	0.0207533	0.015046	ASPM/FGFR1/FZD7/SFRP2/SOX17/WWTR1/ZBTB16	7
GO:0034405	response to fluid shear stress	7/994	34/16992	0.00307089	0.0207533	0.015046	KLF2/KLF4/MEF2C/PKD1/PTGS2/SMAD7/TGFB3	7
GO:0071868	cellular response to monoamine stimulus	7/994	34/16992	0.00307089	0.0207533	0.015046	ABL1/ATP2B4/LRRK2/NR4A3/PDE4B/PDE4D/RYR2	7
GO:0071870	cellular response to catecholamine stimulus	7/994	34/16992	0.00307089	0.0207533	0.015046	ABL1/ATP2B4/LRRK2/NR4A3/PDE4B/PDE4D/RYR2	7
GO:0016053	organic acid biosynthetic process	30/994	301/16992	0.0030934	0.0208493	0.0151156	ACACB/ACOX2/APOC1/ASPA/ATP2B4/BHMT2/CH25H/CSPG4/CYP27A1/DCN/FASN/HAAO/MGLL/MTHFD1L/OSBPL1A/PDK4/PER2/PLA2G5/PLP1/PRKAA2/PRKAG2/PTGDS/PTGIS/PTGS1/PTGS2/PYCR1/SCD/SHMT2/TRIB3/UST	30
GO:0046394	carboxylic acid biosynthetic process	30/994	301/16992	0.0030934	0.0208493	0.0151156	ACACB/ACOX2/APOC1/ASPA/ATP2B4/BHMT2/CH25H/CSPG4/CYP27A1/DCN/FASN/HAAO/MGLL/MTHFD1L/OSBPL1A/PDK4/PER2/PLA2G5/PLP1/PRKAA2/PRKAG2/PTGDS/PTGIS/PTGS1/PTGS2/PYCR1/SCD/SHMT2/TRIB3/UST	30
GO:0001776	leukocyte homeostasis	12/994	83/16992	0.00311832	0.0209892	0.015217	ABL1/BCL2/CCNB2/GPR183/IL6/ITPKB/JAM3/MEF2C/NCKAP1L/PDE4B/TNFAIP3/TSC22D3	12
GO:1901136	carbohydrate derivative catabolic process	20/994	175/16992	0.00317069	0.0213131	0.0154519	ADAMTS9/AGRN/CSPG4/DCN/FGF2/GPC6/HMMR/HPSE2/HSPG2/OGN/OMD/PDE1A/PDE2A/PDE4B/PDE4D/PDE5A/PDE7B/PRELP/SDC2/SDC3	20
GO:0010665	regulation of cardiac muscle cell apoptotic process	6/994	26/16992	0.00330689	0.0220518	0.0159874	CAMK2A/HAND2/HSPB6/ILK/MYOCD/SFRP2	6
GO:0010719	negative regulation of epithelial to mesenchymal transition	6/994	26/16992	0.00330689	0.0220518	0.0159874	BMP5/DACT3/SFRP1/SFRP2/SMAD7/TBX5	6
GO:0033687	osteoblast proliferation	6/994	26/16992	0.00330689	0.0220518	0.0159874	ABL1/BCL2/CYR61/JUNB/SFRP1/TMEM119	6
GO:0045987	positive regulation of smooth muscle contraction	6/994	26/16992	0.00330689	0.0220518	0.0159874	CHRM3/MYOCD/PTGS2/SRF/TACR2/TACR3	6
GO:0060314	regulation of ryanodine-sensitive calcium-release channel activity	6/994	26/16992	0.00330689	0.0220518	0.0159874	AKAP6/CASQ2/DMD/JPH2/PDE4D/PLN	6
GO:0072202	cell differentiation involved in metanephros development	6/994	26/16992	0.00330689	0.0220518	0.0159874	CD34/FAT4/LAMB2/LIF/TCF21/WWTR1	6
GO:0010332	response to gamma radiation	9/994	53/16992	0.00334615	0.022284	0.0161558	BCL2/CCL2/CDKN1A/CRYAB/DCUN1D3/EGR1/FANCD2/H2AFX/MYC	9
GO:0018212	peptidyl-tyrosine modification	35/994	369/16992	0.00335131	0.0222888	0.0161592	ABL1/CNTN1/CSF3/CSPG4/DDR2/EPHA3/EPHA7/EPHB2/ERRFI1/FGF10/FGF2/FGF7/FGFR1/FYN/GHR/HBEGF/IL6/IL6ST/ITGA5/LIF/LRP8/MELK/NTRK3/PDGFD/PDGFRA/PKDCC/PLPP3/ROR1/ROR2/SFRP1/SFRP2/SOCS3/TPST1/TTK/WEE1	35
GO:0031281	positive regulation of cyclase activity	10/994	63/16992	0.00338678	0.0223474	0.0162017	ADCY5/ADCY9/ADGRD1/ADRB3/CAP2/EDNRA/GNAL/GUCA1C/TIMP2/VIPR2	10
GO:0051349	positive regulation of lyase activity	10/994	63/16992	0.00338678	0.0223474	0.0162017	ADCY5/ADCY9/ADGRD1/ADRB3/CAP2/EDNRA/GNAL/GUCA1C/TIMP2/VIPR2	10
GO:0060193	positive regulation of lipase activity	10/994	63/16992	0.00338678	0.0223474	0.0162017	AGTR1/CYR61/EDNRA/ESR1/FGF2/FGFR1/GPIHBP1/LPAR1/PDGFRA/PLA2G5	10
GO:0072413	signal transduction involved in mitotic cell cycle checkpoint	10/994	63/16992	0.00338678	0.0223474	0.0162017	AURKA/BTG2/CCNB1/CDK1/CDKN1A/E2F1/GTSE1/PCNA/RGCC/SOX4	10
GO:1902402	signal transduction involved in mitotic DNA damage checkpoint	10/994	63/16992	0.00338678	0.0223474	0.0162017	AURKA/BTG2/CCNB1/CDK1/CDKN1A/E2F1/GTSE1/PCNA/RGCC/SOX4	10
GO:1902403	signal transduction involved in mitotic DNA integrity checkpoint	10/994	63/16992	0.00338678	0.0223474	0.0162017	AURKA/BTG2/CCNB1/CDK1/CDKN1A/E2F1/GTSE1/PCNA/RGCC/SOX4	10
GO:0031109	microtubule polymerization or depolymerization	12/994	84/16992	0.00344914	0.022729	0.0164784	ABL1/C16orf45/CLIP3/CRYAB/KIF18B/KIF2C/MAPT/RGS2/SKA1/SKA3/STMN1/TPPP	12
GO:0007162	negative regulation of cell adhesion	24/994	226/16992	0.00346459	0.022801	0.0165305	ABL1/ARHGAP6/CORO1C/CXCL12/DLC1/EPCAM/FZD7/JAM2/KANK1/KLF4/LRRC32/MUC21/MYADM/MYOC/PDE5A/PHLDB2/PRKG1/RCC2/RGCC/RND1/SEMA3E/SHH/SMAD7/THBS1	24
GO:0042307	positive regulation of protein import into nucleus	13/994	95/16992	0.00350006	0.0230043	0.0166779	AKAP6/C8orf4/CDK1/CSF3/ECT2/FLNA/IL6/KANK1/PTGS2/RBPMS/SFRP2/SHH/TGFB3	13
GO:0071560	cellular response to transforming growth factor beta stimulus	23/994	214/16992	0.00358306	0.0235191	0.0170512	CCL2/CLDN5/CLEC3B/FBN1/FERMT2/FOS/FYN/ITGA8/JUN/KLF10/LTBP4/MEF2C/MYOCD/PDE2A/PDGFD/SFRP1/SMAD7/TGFB1I1/TGFB3/TGFBR2/TGFBR3/THBS1/ZEB1	23
GO:0035329	hippo signaling	7/994	35/16992	0.00364823	0.0238579	0.0172968	AMOTL1/DCHS1/FAT4/LATS2/PJA2/TEAD1/WWTR1	7
GO:0060795	cell fate commitment involved in formation of primary germ layer	7/994	35/16992	0.00364823	0.0238579	0.0172968	ETS2/FGFR1/FZD7/GATA6/KLF4/SFRP2/SOX17	7
GO:0051346	negative regulation of hydrolase activity	37/994	398/16992	0.00364891	0.0238579	0.0172968	A2M/ABL1/APOC1/AQP1/BIRC5/C3/COL7A1/CPEB2/CRY2/IFI6/IL6/ITIH5/KLF4/KNL1/LEPR/LRRK2/MAGEA3/NCKAP1L/PI16/PKMYT1/PLN/PPP1R15A/PTGS2/PTPRN2/PTTG1/RCC2/RECK/RGS2/RTKN/SFRP2/SLIT2/SPRY1/THBS1/TIMP2/TNNT2/WFDC1/WNT9A	37
GO:0042310	vasoconstriction	11/994	74/16992	0.00366886	0.0239491	0.017363	ACTA2/AGTR1/ATP1A2/BDKRB2/CHRM3/EDNRA/EDNRB/P2RX1/PER2/PTGS2/SLC8A1	11
GO:0010594	regulation of endothelial cell migration	15/994	118/16992	0.00367716	0.0239491	0.017363	ADGRA2/AMOTL1/DCN/FGF2/FGFR1/KLF4/NRP2/PLPP3/PTGS2/RGCC/RHOB/SLIT2/STARD13/STC1/THBS1	15
GO:0031333	negative regulation of protein complex assembly	15/994	118/16992	0.00367716	0.0239491	0.017363	CLIP3/CLU/CRYAB/GSN/KANK1/KIF14/LMOD1/LMOD3/MYADM/PTGER4/SLIT2/STMN1/TBX20/THRA/TMOD1	15
GO:0031346	positive regulation of cell projection organization	31/994	318/16992	0.00371982	0.0241957	0.0175417	AGRN/APBB1/BMP5/CDC42EP3/CNTN1/CORO1C/CPEB1/CPNE6/CXCL12/DPYSL3/EPHA3/EZH2/FGFR1/FSCN1/FYN/HDAC4/IL6/ILK/LPAR1/LRP8/MAP1B/MAPT/NDNF/NEGR1/NTRK3/PALM/RAP1A/SLIT2/SRF/TGFB3/ZEB2	31
GO:0043010	camera-type eye development	29/994	292/16992	0.0037776	0.0245398	0.0177911	ATP2B4/CACNA1C/CC2D2A/CDON/CLIC4/EPHB2/FBN1/FGF10/FOXP2/INHBA/JUN/KLF4/LAMB2/LAMC3/MEIS1/MYOM1/NES/NTRK3/PDGFRA/PITX2/RHOJ/SHH/SLC25A25/SRF/TGFBR2/TMOD1/WNT9A/ZEB1/ZEB2	29
GO:0071158	positive regulation of cell cycle arrest	12/994	85/16992	0.00380769	0.0246009	0.0178355	AURKA/BTG2/CCNB1/CDK1/CDKN1A/E2F1/GATA6/GTSE1/ID2/PCNA/RGCC/SOX4	12
GO:2000379	positive regulation of reactive oxygen species metabolic process	12/994	85/16992	0.00380769	0.0246009	0.0178355	AGTR1/CDKN1A/CLU/HDAC4/IL6/KLF2/KLF4/MAPT/PID1/PTGS2/TGFBR2/THBS1	12
GO:0003143	embryonic heart tube morphogenesis	10/994	64/16992	0.00380838	0.0246009	0.0178355	HAND1/HAND2/MEF2C/RYR2/SHH/SOX17/SRF/STIL/TBX20/TGFBR2	10
GO:0060688	regulation of morphogenesis of a branching structure	9/994	54/16992	0.00381148	0.0246009	0.0178355	AR/ESR1/ETV4/FGF10/FGF7/FGFR1/LRRK2/SFRP1/SHH	9
GO:1903391	regulation of adherens junction organization	9/994	54/16992	0.00381148	0.0246009	0.0178355	ARHGAP6/CORO1C/DLC1/EPHA3/MYOC/PHLDB2/RCC2/SFRP1/THBS1	9
GO:0030902	hindbrain development	17/994	142/16992	0.00388764	0.0250282	0.0181453	ABL1/BCL2/BMP5/CKB/CNTN1/DLC1/EGR2/EZH2/FAIM2/FLNA/FOXP2/KIF14/LPAR1/MDK/NFIB/SHH/WLS	17
GO:0035148	tube formation	17/994	142/16992	0.00388764	0.0250282	0.0181453	ABL1/BMP5/CC2D2A/DLC1/FGF10/HAND1/MTHFD1L/NFIB/PRKACB/PTCH1/SFRP1/SFRP2/SHH/SHROOM3/SOX4/STIL/ZEB2	17
GO:0031668	cellular response to extracellular stimulus	22/994	203/16992	0.00391712	0.0250433	0.0181562	ATF3/BCL2/CDKN1A/CPEB4/FOS/FOSL1/IL6/JUN/KANK2/KCNB1/KLF10/LRRK2/MYOCD/NR4A2/PDK4/PRKAA2/SFRP1/SFRP2/SKP2/SLC39A4/SREBF1/SRF	22
GO:0019934	cGMP-mediated signaling	4/994	12/16992	0.00394488	0.0250433	0.0181562	EDNRB/PDE2A/PRKG1/THBS1	4
GO:0060536	cartilage morphogenesis	4/994	12/16992	0.00394488	0.0250433	0.0181562	HAND1/HAND2/MEF2C/STC1	4
GO:0003215	cardiac right ventricle morphogenesis	5/994	19/16992	0.00395971	0.0250433	0.0181562	HAND1/HAND2/SOX4/TBX20/ZFPM2	5
GO:0006198	cAMP catabolic process	5/994	19/16992	0.00395971	0.0250433	0.0181562	PDE1A/PDE2A/PDE4B/PDE4D/PDE7B	5
GO:0035886	vascular smooth muscle cell differentiation	5/994	19/16992	0.00395971	0.0250433	0.0181562	GATA6/MYOCD/PITX2/SGCB/SRF	5
GO:0035994	response to muscle stretch	5/994	19/16992	0.00395971	0.0250433	0.0181562	DMD/FOS/JUN/RYR2/SLC8A1	5
GO:0036120	cellular response to platelet-derived growth factor stimulus	5/994	19/16992	0.00395971	0.0250433	0.0181562	CCL2/CCNA2/ERRFI1/FYN/PDGFD	5
GO:0044342	type B pancreatic cell proliferation	5/994	19/16992	0.00395971	0.0250433	0.0181562	ERRFI1/IGFBP5/NR4A1/NR4A3/SFRP1	5
GO:0046716	muscle cell cellular homeostasis	5/994	19/16992	0.00395971	0.0250433	0.0181562	CFL2/DMD/IL6/LARGE1/SRF	5
GO:0060074	synapse maturation	5/994	19/16992	0.00395971	0.0250433	0.0181562	CDC20/NFATC4/NFIA/NRXN1/PALM	5
GO:0086014	atrial cardiac muscle cell action potential	5/994	19/16992	0.00395971	0.0250433	0.0181562	ANK2/CACNA1C/CACNB2/FLNA/RYR2	5
GO:0086026	atrial cardiac muscle cell to AV node cell signaling	5/994	19/16992	0.00395971	0.0250433	0.0181562	ANK2/CACNA1C/CACNB2/FLNA/RYR2	5
GO:0086066	atrial cardiac muscle cell to AV node cell communication	5/994	19/16992	0.00395971	0.0250433	0.0181562	ANK2/CACNA1C/CACNB2/FLNA/RYR2	5
GO:0071214	cellular response to abiotic stimulus	29/994	293/16992	0.00396583	0.0250505	0.0181614	AQP1/ATP1A2/AURKB/BDKRB2/CCND2/CDKN1A/CRY2/CRYAB/ECT2/EGR1/ERRFI1/GUCA1C/H2AFX/HDAC4/HIST3H2A/MFAP4/MYC/MYLK/NFATC4/PALM/PCNA/PDE2A/POLD1/PTGER4/PTGS2/RHOB/SFRP1/SFRP2/SLC2A4	29
GO:0071559	response to transforming growth factor beta	23/994	216/16992	0.0040215	0.0253703	0.0183933	CCL2/CLDN5/CLEC3B/FBN1/FERMT2/FOS/FYN/ITGA8/JUN/KLF10/LTBP4/MEF2C/MYOCD/PDE2A/PDGFD/SFRP1/SMAD7/TGFB1I1/TGFB3/TGFBR2/TGFBR3/THBS1/ZEB1	23
GO:0002053	positive regulation of mesenchymal cell proliferation	6/994	27/16992	0.00404462	0.0254204	0.0184296	FGFR1/FOXF1/FOXP2/MYC/SHH/TGFBR2	6
GO:0002675	positive regulation of acute inflammatory response	6/994	27/16992	0.00404462	0.0254204	0.0184296	ADAM8/C3/IL6/IL6ST/PTGER3/PTGS2	6
GO:0010644	cell communication by electrical coupling	6/994	27/16992	0.00404462	0.0254204	0.0184296	ATP1A2/CACNA1C/CASQ2/PDE4D/RYR2/SLC8A1	6
GO:0048538	thymus development	8/994	45/16992	0.0041575	0.0260973	0.0189203	ABL1/BCL2/CCNB2/FGF10/HAND2/PBX1/SHH/SRF	8
GO:1903828	negative regulation of cellular protein localization	17/994	143/16992	0.00417862	0.0261972	0.0189927	ACTN2/CDT1/DACT3/DCLK1/LRRK2/MAPT/PDE2A/PID1/PKD1/PKDCC/PKIG/RAB23/SOX4/THRA/TONSL/TP53INP2/WWTR1	17
GO:0060606	tube closure	12/994	86/16992	0.00419563	0.0262324	0.0190183	ABL1/CC2D2A/DLC1/FGF10/MTHFD1L/PRKACB/PTCH1/SFRP1/SFRP2/SHROOM3/STIL/ZEB2	12
GO:0032386	regulation of intracellular transport	44/994	498/16992	0.00419768	0.0262324	0.0190183	AKAP6/C8orf4/CCL2/CDH3/CDK1/CDKN1A/CRYAB/CSF3/DACT3/ECT2/FLNA/FOXF1/FYN/FZD7/GTSE1/IFI27/IL6/KANK1/KCNB1/LRRK2/MAP1B/PDE2A/PKD1/PKIG/PLN/PPP1R12A/PTGS2/RAB23/RAP1A/RBPMS/REEP1/SFRP2/SHH/SOX4/SREBF1/STOM/SYT11/TGFB3/THRA/TNNT2/TONSL/UGCG/UNC13D/WWTR1	44
GO:1904591	positive regulation of protein import	13/994	97/16992	0.00419989	0.0262324	0.0190183	AKAP6/C8orf4/CDK1/CSF3/ECT2/FLNA/IL6/KANK1/PTGS2/RBPMS/SFRP2/SHH/TGFB3	13
GO:0072401	signal transduction involved in DNA integrity checkpoint	10/994	65/16992	0.00427044	0.0266069	0.0192898	AURKA/BTG2/CCNB1/CDK1/CDKN1A/E2F1/GTSE1/PCNA/RGCC/SOX4	10
GO:0072422	signal transduction involved in DNA damage checkpoint	10/994	65/16992	0.00427044	0.0266069	0.0192898	AURKA/BTG2/CCNB1/CDK1/CDKN1A/E2F1/GTSE1/PCNA/RGCC/SOX4	10
GO:0045995	regulation of embryonic development	15/994	120/16992	0.00431617	0.0267211	0.0193726	AR/CDK1/FGFR1/FZD7/KLF4/LAMA2/LAMA4/MYADM/PHLDB2/PRKACB/RACGAP1/SFRP1/SFRP2/SHH/SOX17	15
GO:0010633	negative regulation of epithelial cell migration	9/994	55/16992	0.00432597	0.0267211	0.0193726	CORO1C/DCN/FGF2/KLF4/RGCC/SLIT2/STARD13/STC1/THBS1	9
GO:0042246	tissue regeneration	9/994	55/16992	0.00432597	0.0267211	0.0193726	CCNB1/CPQ/EZH2/FGF10/FZD7/GSN/LARGE1/SGCA/TGFBR2	9
GO:0045600	positive regulation of fat cell differentiation	9/994	55/16992	0.00432597	0.0267211	0.0193726	CCDC3/ID2/LMO3/PTGS2/SFRP1/SFRP2/VSTM2A/ZBTB16/ZFP36	9
GO:0070373	negative regulation of ERK1 and ERK2 cascade	9/994	55/16992	0.00432597	0.0267211	0.0193726	ABL1/ATF3/CNKSR3/DUSP1/ERRFI1/KLF4/LIF/LMO3/SPRY1	9
GO:0097306	cellular response to alcohol	9/994	55/16992	0.00432597	0.0267211	0.0193726	INHBA/KCNMB1/KLF2/KLF4/LRP8/PRKAA2/PTCH1/PTGER4/SFRP1	9
GO:1903036	positive regulation of response to wounding	9/994	55/16992	0.00432597	0.0267211	0.0193726	CCL2/HBEGF/KANK1/MYLK/NTRK3/PLPP3/SELP/TGFBR2/THBS1	9
GO:1902905	positive regulation of supramolecular fiber organization	19/994	168/16992	0.00444824	0.0274426	0.0198957	ACTN2/CDC42EP3/CFL2/CSF3/CTGF/DSTN/GSN/LMOD1/LPAR1/MAPT/MYOC/NCKAP1L/RGCC/RGS2/SFRP1/SYNPO/SYNPO2/TGFB3/TPM1	19
GO:0030801	positive regulation of cyclic nucleotide metabolic process	14/994	109/16992	0.00448168	0.027615	0.0200207	ADCY5/ADCY9/ADGRD1/ADRB3/AKAP12/CAP2/EDNRA/GNAL/GUCA1C/NPR1/OSTN/RAMP1/TIMP2/VIPR2	14
GO:0043542	endothelial cell migration	18/994	156/16992	0.00448873	0.0276247	0.0200277	ADGRA2/AMOTL1/DCN/EGR3/FGF2/FGFR1/KLF4/NR4A1/NRP2/PTGS2/RGCC/RHOB/SLIT2/SRF/STARD13/STC1/THBS1/TNFSF12	18
GO:0030516	regulation of axon extension	11/994	76/16992	0.00452212	0.0277622	0.0201274	ABL1/CXCL12/DPYSL2/ILK/MAP1B/MAPT/NTRK3/OLFM1/PLXNA1/SEMA3G/SRF	11
GO:0043534	blood vessel endothelial cell migration	11/994	76/16992	0.00452212	0.0277622	0.0201274	AMOTL1/EGR3/FGF2/KLF4/NR4A1/PTGS2/RGCC/SLIT2/SRF/STARD13/THBS1	11
GO:0051928	positive regulation of calcium ion transport	13/994	98/16992	0.00458988	0.0281438	0.0204041	ABL1/AKAP6/ANK2/BDKRB1/CACNA2D1/CACNB2/CAMK2A/CCL2/CXCL12/JPH2/MYLK/RYR2/STC1	13
GO:0007224	smoothened signaling pathway	15/994	121/16992	0.00466802	0.0285881	0.0207261	BOC/CC2D2A/CDON/FGF10/FOXF1/HHIP/PRKACB/PTCH1/ROR2/SCUBE1/SFRP1/SHH/STIL/TGFBR2/WNT9A	15
GO:0007266	Rho protein signal transduction	19/994	169/16992	0.00474515	0.0290251	0.021043	AGTR1/AKAP13/ARHGAP6/ARHGEF17/ARHGEF25/ARHGEF26/ARHGEF37/ARHGEF9/CDC42EP3/DLC1/ECT2/KANK1/LPAR1/MYOC/PLEKHG4B/RHOB/RHOJ/RTKN/STMN1	19
GO:0046890	regulation of lipid biosynthetic process	16/994	133/16992	0.00477419	0.029063	0.0210705	APOC1/BMP5/C3/CCDC3/CYR61/DHCR7/EGR1/LDLR/PDK4/PRKAA2/PRKAG2/PTGS2/SIK1/SORBS1/SREBF1/TRIB3	16
GO:0072395	signal transduction involved in cell cycle checkpoint	10/994	66/16992	0.00477559	0.029063	0.0210705	AURKA/BTG2/CCNB1/CDK1/CDKN1A/E2F1/GTSE1/PCNA/RGCC/SOX4	10
GO:1901989	positive regulation of cell cycle phase transition	10/994	66/16992	0.00477559	0.029063	0.0210705	CCND2/CDC45/CDC6/CDCA5/CDK1/CDT1/DLGAP5/PBX1/RCC2/UBE2C	10
GO:0014015	positive regulation of gliogenesis	8/994	46/16992	0.00478025	0.029063	0.0210705	ASPA/BIN1/CXCR4/ID2/IL6ST/LIF/SHH/ZNF488	8
GO:1900024	regulation of substrate adhesion-dependent cell spreading	8/994	46/16992	0.00478025	0.029063	0.0210705	CORO1C/FLNA/KANK1/MYADM/MYOC/RAC3/RCC2/UNC13D	8
GO:0010453	regulation of cell fate commitment	6/994	28/16992	0.00489729	0.0295601	0.0214308	AR/FGF2/FGFR1/FZD7/SFRP2/SOX17	6
GO:0010662	regulation of striated muscle cell apoptotic process	6/994	28/16992	0.00489729	0.0295601	0.0214308	CAMK2A/HAND2/HSPB6/ILK/MYOCD/SFRP2	6
GO:0044319	wound healing, spreading of cells	6/994	28/16992	0.00489729	0.0295601	0.0214308	CYR61/FLNA/GSN/HBEGF/ITGA5/PHLDB2	6
GO:0051293	establishment of spindle localization	6/994	28/16992	0.00489729	0.0295601	0.0214308	CENPA/FGF10/NDC80/NUSAP1/SPAG5/SPRY1	6
GO:0051491	positive regulation of filopodium assembly	6/994	28/16992	0.00489729	0.0295601	0.0214308	AGRN/DPYSL3/FSCN1/PALM/SRF/TGFB3	6
GO:0090505	epiboly involved in wound healing	6/994	28/16992	0.00489729	0.0295601	0.0214308	CYR61/FLNA/GSN/HBEGF/ITGA5/PHLDB2	6
GO:0030282	bone mineralization	13/994	99/16992	0.00500849	0.0298844	0.0216659	CLEC3B/DDR2/KLF10/MEF2C/MGP/OMD/PKDCC/PTGS2/ROR2/S1PR1/SLC8A1/TGFB3/TMEM119	13
GO:0090100	positive regulation of transmembrane receptor protein serine/threonine kinase signaling pathway	13/994	99/16992	0.00500849	0.0298844	0.0216659	BMP5/CYR61/GATA6/ILK/INHBA/ITGA8/MYOCD/RBPMS/TGFB1I1/TGFB3/TGFBR3/THBS1/TTK	13
GO:0003283	atrial septum development	5/994	20/16992	0.00502887	0.0298844	0.0216659	ANK2/CYR61/SOX4/TBX20/TBX5	5
GO:0010664	negative regulation of striated muscle cell apoptotic process	5/994	20/16992	0.00502887	0.0298844	0.0216659	HAND2/HSPB6/ILK/MYOCD/SFRP2	5
GO:0010738	regulation of protein kinase A signaling	5/994	20/16992	0.00502887	0.0298844	0.0216659	AKAP12/AKAP6/C8orf4/LRRK2/PJA2	5
GO:0036119	response to platelet-derived growth factor	5/994	20/16992	0.00502887	0.0298844	0.0216659	CCL2/CCNA2/ERRFI1/FYN/PDGFD	5
GO:0040001	establishment of mitotic spindle localization	5/994	20/16992	0.00502887	0.0298844	0.0216659	CENPA/FGF10/NDC80/NUSAP1/SPRY1	5
GO:0045649	regulation of macrophage differentiation	5/994	20/16992	0.00502887	0.0298844	0.0216659	ID2/INHBA/LIF/ROR2/TRIB1	5
GO:0051294	establishment of spindle orientation	5/994	20/16992	0.00502887	0.0298844	0.0216659	CENPA/FGF10/NDC80/SPAG5/SPRY1	5
GO:0051900	regulation of mitochondrial depolarization	5/994	20/16992	0.00502887	0.0298844	0.0216659	BCL2/DCN/IFI6/LRRK2/MYOC	5
GO:0072111	cell proliferation involved in kidney development	5/994	20/16992	0.00502887	0.0298844	0.0216659	EGR1/MYC/PDGFD/PTCH1/SHH	5
GO:0009855	determination of bilateral symmetry	15/994	122/16992	0.00504282	0.0298844	0.0216659	CC2D2A/DAAM2/FGF10/FOXF1/GREM2/HAND1/HAND2/MEF2C/PITX2/SHH/SOX17/SRF/STIL/TBX20/TGFBR2	15
GO:0060412	ventricular septum morphogenesis	7/994	37/16992	0.00504611	0.0298844	0.0216659	ID2/PITX2/SMAD7/SOX4/TGFBR2/TGFBR3/ZFPM2	7
GO:0071867	response to monoamine	7/994	37/16992	0.00504611	0.0298844	0.0216659	ABL1/ATP2B4/LRRK2/NR4A3/PDE4B/PDE4D/RYR2	7
GO:0071869	response to catecholamine	7/994	37/16992	0.00504611	0.0298844	0.0216659	ABL1/ATP2B4/LRRK2/NR4A3/PDE4B/PDE4D/RYR2	7
GO:1900274	regulation of phospholipase C activity	7/994	37/16992	0.00504611	0.0298844	0.0216659	ABL1/EDNRA/ESR1/FGF2/FGFR1/LPAR1/PDGFRA	7
GO:0051224	negative regulation of protein transport	21/994	195/16992	0.00511301	0.0302094	0.0219016	CD34/DACT3/IL6/KCNB1/LRRC32/LRRK2/PDE2A/PKD1/PKDCC/PKIG/PTGER4/RAB23/RGCC/SFRP1/SOX4/SREBF1/SSC5D/SYT11/THRA/TONSL/WWTR1	21
GO:1903046	meiotic cell cycle process	21/994	195/16992	0.00511301	0.0302094	0.0219016	ASPM/AURKA/BUB1/BUB1B/CCNE1/CDC20/CKS2/FANCA/FANCD2/HSPA2/LIF/MKI67/NCAPD2/NCAPH/P3H4/PLK1/PTTG1/RAD54L/TOP2A/TRIP13/TTK	21
GO:0043401	steroid hormone mediated signaling pathway	20/994	183/16992	0.00526316	0.0310601	0.0225183	AKAP13/AR/CALCOCO1/CCNE1/CRY2/ESR1/KANK2/LMO3/NR2F1/NR3C2/NR4A1/NR4A2/NR4A3/PER1/PGR/SFRP1/SKP2/TCF21/TGFB1I1/THRA	20
GO:0001780	neutrophil homeostasis	4/994	13/16992	0.00543689	0.0318442	0.0230868	IL6/ITPKB/JAM3/PDE4B	4
GO:0007100	mitotic centrosome separation	4/994	13/16992	0.00543689	0.0318442	0.0230868	AURKA/KIF11/NEK2/RANBP3L	4
GO:0014854	response to inactivity	4/994	13/16992	0.00543689	0.0318442	0.0230868	FBXO32/HDAC4/SGCA/UTRN	4
GO:0045651	positive regulation of macrophage differentiation	4/994	13/16992	0.00543689	0.0318442	0.0230868	ID2/LIF/ROR2/TRIB1	4
GO:0071872	cellular response to epinephrine stimulus	4/994	13/16992	0.00543689	0.0318442	0.0230868	ATP2B4/PDE4B/PDE4D/RYR2	4
GO:0009799	specification of symmetry	15/994	123/16992	0.00544163	0.0318442	0.0230868	CC2D2A/DAAM2/FGF10/FOXF1/GREM2/HAND1/HAND2/MEF2C/PITX2/SHH/SOX17/SRF/STIL/TBX20/TGFBR2	15
GO:0001841	neural tube formation	13/994	100/16992	0.00545716	0.0318442	0.0230868	ABL1/BMP5/CC2D2A/DLC1/MTHFD1L/PRKACB/PTCH1/SFRP1/SFRP2/SHROOM3/SOX4/STIL/ZEB2	13
GO:0018108	peptidyl-tyrosine phosphorylation	34/994	367/16992	0.00546154	0.0318442	0.0230868	ABL1/CNTN1/CSF3/CSPG4/DDR2/EPHA3/EPHA7/EPHB2/ERRFI1/FGF10/FGF2/FGF7/FGFR1/FYN/GHR/HBEGF/IL6/IL6ST/ITGA5/LIF/LRP8/MELK/NTRK3/PDGFD/PDGFRA/PKDCC/PLPP3/ROR1/ROR2/SFRP1/SFRP2/SOCS3/TTK/WEE1	34
GO:0010171	body morphogenesis	8/994	47/16992	0.00547204	0.0318442	0.0230868	CDON/CLDN5/CRISPLD2/GREM2/MYH3/PHLDB2/TGFB3/TIPARP	8
GO:0045840	positive regulation of mitotic nuclear division	8/994	47/16992	0.00547204	0.0318442	0.0230868	AURKA/CDCA5/CDT1/DLGAP5/NUSAP1/RANBP3L/RGCC/UBE2C	8
GO:0055010	ventricular cardiac muscle tissue morphogenesis	8/994	47/16992	0.00547204	0.0318442	0.0230868	COL11A1/HAND1/RYR2/SMAD7/TGFBR3/TNNT2/TPM1/ZFPM2	8
GO:2000243	positive regulation of reproductive process	8/994	47/16992	0.00547204	0.0318442	0.0230868	AR/AURKA/CACNA1H/EDNRB/INHBA/PDE5A/SHH/ZFPM2	8
GO:0007492	endoderm development	11/994	78/16992	0.0055258	0.0320533	0.0232384	COL11A1/COL7A1/DUSP1/DUSP2/DUSP5/GATA6/INHBA/ITGA5/ITGA7/SOX17/TBX20	11
GO:0045761	regulation of adenylate cyclase activity	11/994	78/16992	0.0055258	0.0320533	0.0232384	ADCY5/ADCY9/ADGRD1/ADRB3/CAP2/EDNRA/EDNRB/GNAL/PALM/TIMP2/VIPR2	11
GO:0000187	activation of MAPK activity	17/994	147/16992	0.00552709	0.0320533	0.0232384	ADAM8/AKAP13/CDK1/CSPG4/CXCR4/DUSP5/FGF10/FGF2/GHR/IQGAP3/ITGA1/LPAR1/LRRK2/MAP3K20/NTRK3/TGFB3/THBS1	17
GO:0009791	post-embryonic development	12/994	89/16992	0.00555271	0.0321648	0.0233192	ABL1/BCL2/DHCR7/FBN1/FOXP2/ITPR1/KLF4/MFAP2/NDN/NR4A2/SCUBE1/TIPARP	12
GO:0007126	meiotic nuclear division	20/994	184/16992	0.00559049	0.0323463	0.0234509	ASPM/AURKA/BUB1/BUB1B/CCNE1/CDC20/CKS2/FANCA/FANCD2/HSPA2/LIF/MKI67/NCAPH/P3H4/PLK1/PTTG1/RAD54L/TOP2A/TRIP13/TTK	20
GO:0010659	cardiac muscle cell apoptotic process	6/994	29/16992	0.00587486	0.0337868	0.0244952	CAMK2A/HAND2/HSPB6/ILK/MYOCD/SFRP2	6
GO:0030866	cortical actin cytoskeleton organization	6/994	29/16992	0.00587486	0.0337868	0.0244952	EHD2/EPB41L2/KIF23/NCKAP1L/RACGAP1/TLN1	6
GO:0033260	nuclear DNA replication	6/994	29/16992	0.00587486	0.0337868	0.0244952	CDC45/CDT1/FGFR1/GINS1/LIG1/PCNA	6
GO:0090504	epiboly	6/994	29/16992	0.00587486	0.0337868	0.0244952	CYR61/FLNA/GSN/HBEGF/ITGA5/PHLDB2	6
GO:1901021	positive regulation of calcium ion transmembrane transporter activity	6/994	29/16992	0.00587486	0.0337868	0.0244952	AKAP6/ANK2/CACNA2D1/CACNB2/JPH2/RYR2	6
GO:0010470	regulation of gastrulation	7/994	38/16992	0.00587976	0.0337868	0.0244952	FGFR1/FZD7/KLF4/MYADM/PHLDB2/SFRP2/SOX17	7
GO:0045637	regulation of myeloid cell differentiation	20/994	185/16992	0.00593435	0.0340615	0.0246944	CSF3/FBN1/FOS/ID2/INHBA/ITPKB/JUN/KLF10/LIF/MEF2C/MEIS1/MEIS2/MITF/MYC/NCKAP1L/ROR2/SFRP1/TRIB1/ZBTB16/ZFP36	20
GO:0010976	positive regulation of neuron projection development	24/994	236/16992	0.00596139	0.0341777	0.0247786	APBB1/BMP5/CNTN1/CPEB1/CPNE6/CXCL12/DPYSL3/EPHA3/EZH2/FGFR1/FYN/IL6/ILK/LPAR1/LRP8/MAP1B/MAPT/NDNF/NEGR1/NTRK3/RAP1A/SLIT2/SRF/ZEB2	24
GO:0046632	alpha-beta T cell differentiation	12/994	90/16992	0.00607538	0.0347916	0.0252236	ABL1/BCL2/GPR183/IL6/ITPKB/NCKAP1L/PTGER4/SATB1/SHH/SMAD7/TGFBR2/ZBTB16	12
GO:0045445	myoblast differentiation	11/994	79/16992	0.00608946	0.0348326	0.0252534	ASB2/BOC/CDON/ILK/KLHL41/MEF2C/MYOCD/PITX1/RANBP3L/SHH/SRF	11
GO:0001947	heart looping	9/994	58/16992	0.00619876	0.0354174	0.0256774	HAND1/HAND2/MEF2C/SHH/SOX17/SRF/STIL/TBX20/TGFBR2	9
GO:0086002	cardiac muscle cell action potential involved in contraction	8/994	48/16992	0.0062376	0.0355585	0.0257797	ANK2/CACNA1C/CACNA2D1/CACNB2/FLNA/KCND3/RYR2/SCN4B	8
GO:0090303	positive regulation of wound healing	8/994	48/16992	0.0062376	0.0355585	0.0257797	CCL2/HBEGF/KANK1/MYLK/PLPP3/SELP/TGFBR2/THBS1	8
GO:0003416	endochondral bone growth	5/994	21/16992	0.00628744	0.0356407	0.0258392	BNC2/DDR2/OSTN/STC1/TGFBR2	5
GO:0045663	positive regulation of myoblast differentiation	5/994	21/16992	0.00628744	0.0356407	0.0258392	BOC/CDON/ILK/MEF2C/RANBP3L	5
GO:0046697	decidualization	5/994	21/16992	0.00628744	0.0356407	0.0258392	JUNB/LIF/PTGIS/PTGS2/STC1	5
GO:0048846	axon extension involved in axon guidance	5/994	21/16992	0.00628744	0.0356407	0.0258392	CXCL12/NRP2/PLXNA1/SLIT2/SLIT3	5
GO:1902284	neuron projection extension involved in neuron projection guidance	5/994	21/16992	0.00628744	0.0356407	0.0258392	CXCL12/NRP2/PLXNA1/SLIT2/SLIT3	5
GO:0007009	plasma membrane organization	27/994	277/16992	0.00649818	0.0367937	0.0266752	ACTN2/ANK2/AR/CACNB2/CLIP3/CLU/CXCR4/DCHS1/DYSF/EHD2/FAT4/FLNA/KCNB1/KIF13A/MYADM/MYH2/NFASC/PALM/PID1/PKDCC/PLSCR4/PTCH1/RAMP1/SLMAP/SORBS1/SYT11/SYT7	27
GO:0014020	primary neural tube formation	12/994	91/16992	0.00663622	0.0375224	0.0272035	ABL1/BMP5/CC2D2A/DLC1/MTHFD1L/PRKACB/PTCH1/SFRP1/SFRP2/SHROOM3/STIL/ZEB2	12
GO:0030203	glycosaminoglycan metabolic process	18/994	162/16992	0.00664179	0.0375224	0.0272035	AGRN/CSGALNACT1/CSPG4/DCN/FGF2/GPC6/HMMR/HPSE2/HSPG2/ITIH5/MKI67/NDNF/OGN/OMD/PRELP/SDC2/SDC3/UST	18
GO:0007368	determination of left/right symmetry	14/994	114/16992	0.00668098	0.0377014	0.0273332	CC2D2A/DAAM2/FGF10/FOXF1/HAND1/HAND2/MEF2C/PITX2/SHH/SOX17/SRF/STIL/TBX20/TGFBR2	14
GO:0097756	negative regulation of blood vessel diameter	11/994	80/16992	0.0066973	0.0377512	0.0273693	ACTA2/AGTR1/ATP1A2/BDKRB2/CHRM3/EDNRA/EDNRB/P2RX1/PER2/PTGS2/SLC8A1	11
GO:0008361	regulation of cell size	17/994	150/16992	0.00675516	0.0379921	0.027544	ABL1/AKT3/AQP1/CXCL12/DPYSL2/EPHA7/ILK/IQGAP3/KCNMA1/MAP1B/MAPT/NTRK3/OLFM1/PLXNA1/SEMA3G/SPG20/SRF	17
GO:0050770	regulation of axonogenesis	17/994	150/16992	0.00675516	0.0379921	0.027544	ABL1/CXCL12/DPYSL2/EPHA7/EPHB2/ILK/MAP1B/MAPT/NTRK3/OLFM1/PLXNA1/SEMA3G/SLIT2/SPG20/SRF/UST/ZEB2	17
GO:0003197	endocardial cushion development	7/994	39/16992	0.0068121	0.0380147	0.0275604	BMP5/DCHS1/FOXF1/TBX20/TBX5/TGFBR2/TMEM100	7
GO:0007190	activation of adenylate cyclase activity	7/994	39/16992	0.0068121	0.0380147	0.0275604	ADCY5/ADCY9/ADRB3/CAP2/EDNRA/GNAL/VIPR2	7
GO:0007520	myoblast fusion	7/994	39/16992	0.0068121	0.0380147	0.0275604	ADGRB3/CACNA1H/CDON/EHD2/NFATC2/PITX2/PLEKHO1	7
GO:0030199	collagen fibril organization	7/994	39/16992	0.0068121	0.0380147	0.0275604	COL11A1/COL14A1/DDR2/DPT/MMP11/SFRP2/TNXB	7
GO:0051445	regulation of meiotic cell cycle	7/994	39/16992	0.0068121	0.0380147	0.0275604	ASPM/CDC20/CDK1/DUSP1/LIF/PRKACB/TTK	7
GO:0071377	cellular response to glucagon stimulus	7/994	39/16992	0.0068121	0.0380147	0.0275604	ADCY5/ADCY9/GLP2R/GNG11/GNG7/PRKACB/PRKAR2B	7
GO:1905207	regulation of cardiocyte differentiation	7/994	39/16992	0.0068121	0.0380147	0.0275604	AKAP6/FZD7/GATA6/MEF2C/MYOCD/SOX17/TBX5	7
GO:0034504	protein localization to nucleus	33/994	359/16992	0.00687506	0.0383235	0.0277843	AKAP6/C8orf4/CDK1/CDKN1A/CSF3/DACT3/DCLK1/ECT2/FLNA/FYN/FZD7/GTSE1/IL6/JUN/KANK1/KPNA2/LIF/PDE2A/PKD1/PKIG/PLK1/PTGS2/RAB23/RANBP3L/RBPMS/SFRP2/SHH/SYNE1/TGFB3/THRA/TONSL/WWTR1/ZBTB16	33
GO:0009991	response to extracellular stimulus	39/994	442/16992	0.00691275	0.0384909	0.0279056	ACACB/ADRB3/ATF3/BCHE/BCL2/CCL2/CDKN1A/CPEB4/DNMT3B/FOS/FOSL1/FSTL1/GSN/IL6/JUN/KANK2/KCNB1/KLF10/LIPG/LRRK2/MEF2C/MYOCD/NR4A2/PDK4/PITX2/PRKAA2/PTGS2/SFRP1/SFRP2/SKP2/SLC25A25/SLC39A4/SLC8A1/SREBF1/SRF/STC1/TGFBR2/TYMS/ZFP36	39
GO:1902105	regulation of leukocyte differentiation	24/994	239/16992	0.00695071	0.0386492	0.0280204	ADAM8/EGR3/FANCA/FANCD2/FBN1/FOS/ID2/IL6/INHBA/ITPKB/JUN/KLF10/LIF/MITF/MYC/NCKAP1L/ROR2/SFRP1/SHH/SMAD7/TGFBR2/TRIB1/ZBTB16/ZEB1	24
GO:0010737	protein kinase A signaling	6/994	30/16992	0.00698729	0.0386492	0.0280204	AKAP12/AKAP6/C8orf4/LRRK2/MYOM1/PJA2	6
GO:0042311	vasodilation	6/994	30/16992	0.00698729	0.0386492	0.0280204	ADRB3/BDKRB2/EDNRB/ITGA1/PRKG1/RGS2	6
GO:0048730	epidermis morphogenesis	6/994	30/16992	0.00698729	0.0386492	0.0280204	BCL2/FGF10/FGF7/IGFBP5/KLF4/SHH	6
GO:0060306	regulation of membrane repolarization	6/994	30/16992	0.00698729	0.0386492	0.0280204	AKAP6/ANK2/CACNA2D1/CASQ2/FLNA/SCN4B	6
GO:0071470	cellular response to osmotic stress	6/994	30/16992	0.00698729	0.0386492	0.0280204	AQP1/BDKRB2/ERRFI1/MYLK/PTGS2/SLC2A4	6
GO:0002237	response to molecule of bacterial origin	30/994	319/16992	0.007083	0.0391355	0.028373	ABL1/BDKRB1/CCL2/CD55/CPEB1/CSF3/CTSG/CXCL2/DCN/EDNRB/FGF10/FOS/IL6/IRF5/JUN/JUNB/JUND/MAOB/MEF2C/PDE4B/PDE4D/PLSCR4/PTGER4/PTGFR/PTGS2/SELP/SSC5D/TNFAIP3/TRIB1/ZFP36	30
GO:0046824	positive regulation of nucleocytoplasmic transport	14/994	115/16992	0.00720986	0.0397927	0.0288494	AKAP6/C8orf4/CDK1/CSF3/ECT2/FLNA/GTSE1/IL6/KANK1/PTGS2/RBPMS/SFRP2/SHH/TGFB3	14
GO:0051261	protein depolymerization	12/994	92/16992	0.00723712	0.0398695	0.0289051	ACTN2/C16orf45/CFL2/DSTN/GSN/KIF18B/KIF2C/LMOD1/LMOD3/NES/STMN1/TMOD1	12
GO:0006957	complement activation, alternative pathway	4/994	14/16992	0.00726342	0.0398695	0.0289051	C3/C7/CFD/CFH	4
GO:0034616	response to laminar fluid shear stress	4/994	14/16992	0.00726342	0.0398695	0.0289051	KLF2/KLF4/SMAD7/TGFB3	4
GO:0051299	centrosome separation	4/994	14/16992	0.00726342	0.0398695	0.0289051	AURKA/KIF11/NEK2/RANBP3L	4
GO:0051481	negative regulation of cytosolic calcium ion concentration	4/994	14/16992	0.00726342	0.0398695	0.0289051	ATP1A2/KCNK3/RYR3/SLC8A1	4
GO:0031571	mitotic G1 DNA damage checkpoint	10/994	70/16992	0.0072813	0.0398806	0.0289131	AURKA/BTG2/CCNB1/CDK1/CDKN1A/E2F1/GTSE1/PCNA/RGCC/SOX4	10
GO:0044819	mitotic G1/S transition checkpoint	10/994	70/16992	0.0072813	0.0398806	0.0289131	AURKA/BTG2/CCNB1/CDK1/CDKN1A/E2F1/GTSE1/PCNA/RGCC/SOX4	10
GO:0007498	mesoderm development	15/994	127/16992	0.00729918	0.0398916	0.0289211	ETS2/FGFR1/FOXF1/HAND1/INHBA/ITGA8/KLF4/NR4A3/SFRP2/SHH/SOX17/SRF/TBX20/WLS/ZFPM2	15
GO:0050921	positive regulation of chemotaxis	15/994	127/16992	0.00729918	0.0398916	0.0289211	CCL2/CXCL12/CXCL2/FGF10/FGF2/FGFR1/IL6/LPAR1/NCKAP1L/NTRK3/PDGFD/S1PR1/SLIT2/THBS1/VEGFD	15
GO:0045165	cell fate commitment	24/994	241/16992	0.00768244	0.0419406	0.0304067	AR/BCL2/CDON/ETS2/FGF10/FGF2/FGFR1/FZD7/GATA6/ID2/IL6/KLF4/LATS2/MEF2C/NTRK3/PITX1/PTCH1/ROR2/SFRP1/SFRP2/SHH/SOX17/TGFB1I1/WNT9A	24
GO:0003148	outflow tract septum morphogenesis	5/994	22/16992	0.00775155	0.0421655	0.0305697	GATA6/PARVA/TBX20/TGFBR2/ZFPM2	5
GO:0003272	endocardial cushion formation	5/994	22/16992	0.00775155	0.0421655	0.0305697	BMP5/DCHS1/TBX20/TGFBR2/TMEM100	5
GO:0030539	male genitalia development	5/994	22/16992	0.00775155	0.0421655	0.0305697	AR/BMP5/FGF10/ROR2/SHH	5
GO:0060135	maternal process involved in female pregnancy	9/994	60/16992	0.00775719	0.0421655	0.0305697	AR/CCL2/ESR1/JUNB/LIF/PAM/PTGIS/PTGS2/STC1	9
GO:0009411	response to UV	15/994	128/16992	0.00783486	0.0424959	0.0308092	AQP1/AURKB/BCL2/CDKN1A/DCUN1D3/DTL/FEN1/HIST3H2A/MFAP4/MYC/NFATC4/PCLAF/PCNA/POLD1/PTGS2	15
GO:0072175	epithelial tube formation	15/994	128/16992	0.00783486	0.0424959	0.0308092	ABL1/BMP5/CC2D2A/DLC1/FGF10/HAND1/MTHFD1L/PRKACB/PTCH1/SFRP1/SFRP2/SHROOM3/SOX4/STIL/ZEB2	15
GO:0048871	multicellular organismal homeostasis	31/994	335/16992	0.00785626	0.042566	0.03086	ACACB/ADAM8/ADCY5/ADCY9/ADRB3/AKT3/AQP1/BCL2/CD34/CDH3/CTGF/EDNRB/IL6/JCHAIN/LDB2/LEPR/NDN/NR4A3/PDK4/PRKAA2/PRKACB/PRKAR2B/PTGER3/PTGS2/RAC3/S1PR1/SRF/STMN1/TNFAIP3/TNS2/TP53INP2	31
GO:0008585	female gonad development	12/994	93/16992	0.00787996	0.0426026	0.0308866	ADAMTS1/BCL2/ESR1/FANCA/INHBA/PDGFRA/PITX2/SFRP1/SLIT2/SLIT3/TIPARP/ZFPM2	12
GO:0031279	regulation of cyclase activity	12/994	93/16992	0.00787996	0.0426026	0.0308866	ADCY5/ADCY9/ADGRD1/ADRB3/CAP2/EDNRA/EDNRB/GNAL/GUCA1C/PALM/TIMP2/VIPR2	12
GO:0034644	cellular response to UV	10/994	71/16992	0.008043	0.0433908	0.031458	AQP1/AURKB/CDKN1A/HIST3H2A/MFAP4/MYC/NFATC4/PCNA/POLD1/PTGS2	10
GO:0044783	G1 DNA damage checkpoint	10/994	71/16992	0.008043	0.0433908	0.031458	AURKA/BTG2/CCNB1/CDK1/CDKN1A/E2F1/GTSE1/PCNA/RGCC/SOX4	10
GO:0030819	positive regulation of cAMP biosynthetic process	11/994	82/16992	0.00805467	0.0434071	0.0314699	ADCY5/ADCY9/ADGRD1/ADRB3/AKAP12/CAP2/EDNRA/GNAL/RAMP1/TIMP2/VIPR2	11
GO:0030217	T cell differentiation	22/994	216/16992	0.00808621	0.0435304	0.0315593	ABL1/ADAM8/BCL2/EGR1/EGR3/FANCA/FANCD2/FZD7/GPR183/IL6/ITPKB/LEPR/NCKAP1L/PTGER4/SATB1/SHH/SMAD7/SOX4/SRF/TGFBR2/ZBTB16/ZEB1	22
GO:0044774	mitotic DNA integrity checkpoint	13/994	105/16992	0.0082051	0.0441233	0.031989	AURKA/BTG2/CCNB1/CDK1/CDKN1A/E2F1/FANCI/FOXN3/GTSE1/PCNA/RGCC/SOX4/TOP2A	13
GO:0003401	axis elongation	6/994	31/16992	0.00824446	0.0442403	0.0320739	ESR1/FGF10/SFRP1/SFRP2/SHH/SPRY1	6
GO:0010658	striated muscle cell apoptotic process	6/994	31/16992	0.00824446	0.0442403	0.0320739	CAMK2A/HAND2/HSPB6/ILK/MYOCD/SFRP2	6
GO:0030595	leukocyte chemotaxis	20/994	191/16992	0.00837977	0.0449184	0.0325655	ADAM8/CCL14/CCL2/CH25H/CXCL12/CXCL2/CXCR4/EDNRB/GPR183/IL6/ITGA1/ITGA9/JAM3/NCKAP1L/PDE4B/PDE4D/S1PR1/SLIT2/THBS1/VEGFD	20
GO:0051339	regulation of lyase activity	12/994	94/16992	0.00856667	0.0458714	0.0332564	ADCY5/ADCY9/ADGRD1/ADRB3/CAP2/EDNRA/EDNRB/GNAL/GUCA1C/PALM/TIMP2/VIPR2	12
GO:0043462	regulation of ATPase activity	9/994	61/16992	0.00864027	0.0462163	0.0335065	DNAJB4/FGF10/NCAPH/PLN/RYR2/TNNT2/TPM1/TPM2/UHRF1	9
GO:1905330	regulation of morphogenesis of an epithelium	19/994	179/16992	0.00871219	0.0465514	0.0337495	ABL1/AR/CELSR3/ESR1/ETV4/FGF10/FGF7/FGFR1/FZD7/GPC6/GSN/LIF/PHLDB2/PRICKLE2/ROR1/ROR2/SFRP1/SFRP2/SHH	19
GO:1903706	regulation of hemopoiesis	30/994	324/16992	0.00875071	0.0467076	0.0338627	ADAM8/C8orf4/CSF3/EGR3/FANCA/FANCD2/FBN1/FOS/ID2/IL6/INHBA/ITPKB/JUN/KLF10/LIF/MEF2C/MEIS1/MEIS2/MITF/MYC/NCKAP1L/ROR2/SFRP1/SHH/SMAD7/TGFBR2/TRIB1/ZBTB16/ZEB1/ZFP36	30
GO:0035264	multicellular organism growth	16/994	142/16992	0.00890098	0.0474593	0.0344077	ADARB1/ADRB3/AR/BCL2/CLIC4/DHCR7/GHR/KLF2/PDE4D/PKDCC/PTCH1/SLC25A25/STIL/STK40/TNS2/WWTR1	16
GO:0071548	response to dexamethasone	7/994	41/16992	0.00899954	0.0478833	0.034715	AQP1/CCL2/DNMT3B/ERRFI1/FBXO32/IL6/PCNA	7
GO:1901862	negative regulation of muscle tissue development	7/994	41/16992	0.00899954	0.0478833	0.034715	FZD7/IGFBP5/MYOCD/SHH/TBX5/TGFBR2/TSC22D3	7
GO:0006022	aminoglycan metabolic process	18/994	167/16992	0.00901796	0.0479306	0.0347493	AGRN/CSGALNACT1/CSPG4/DCN/FGF2/GPC6/HMMR/HPSE2/HSPG2/ITIH5/MKI67/NDNF/OGN/OMD/PRELP/SDC2/SDC3/UST	18
GO:0006606	protein import into nucleus	26/994	271/16992	0.0091014	0.048272	0.0349968	AKAP6/C8orf4/CDK1/CDKN1A/CSF3/DACT3/ECT2/FLNA/FZD7/IL6/JUN/KANK1/KPNA2/PDE2A/PKD1/PKIG/PTGS2/RAB23/RANBP3L/RBPMS/SFRP2/SHH/TGFB3/THRA/TONSL/WWTR1	26
GO:0044744	protein targeting to nucleus	26/994	271/16992	0.0091014	0.048272	0.0349968	AKAP6/C8orf4/CDK1/CDKN1A/CSF3/DACT3/ECT2/FLNA/FZD7/IL6/JUN/KANK1/KPNA2/PDE2A/PKD1/PKIG/PTGS2/RAB23/RANBP3L/RBPMS/SFRP2/SHH/TGFB3/THRA/TONSL/WWTR1	26
GO:0002521	leukocyte differentiation	40/994	464/16992	0.00914671	0.0484612	0.035134	ABL1/ADAM8/BCL2/CSF3/EGR1/EGR3/FANCA/FANCD2/FBN1/FOS/FZD7/GPR183/HDAC4/ID2/IL6/INHBA/ITPKB/JUN/JUNB/KLF10/KLF6/LEPR/LIF/MEF2C/MITF/MYC/NCKAP1L/PTGER4/ROR2/SATB1/SFRP1/SHH/SMAD7/SOX4/SRF/TGFBR2/TRIB1/TSPAN2/ZBTB16/ZEB1	40
GO:0050727	regulation of inflammatory response	27/994	285/16992	0.00935331	0.0494047	0.0358181	A2M/ADAM8/AGTR1/C3/C7/CD55/CFH/CMA1/EDNRB/ESR1/FANCA/FANCD2/FOXF1/IL6/IL6ST/KLF4/LDLR/MGLL/PDE2A/PER1/PTGER3/PTGER4/PTGIS/PTGS2/SOCS3/TNFAIP3/WFDC1	27
GO:0002691	regulation of cellular extravasation	5/994	23/16992	0.00943672	0.0494047	0.0358181	ADAM8/CCL2/CXCL12/PDGFD/PTGER4	5
GO:0009299	mRNA transcription	5/994	23/16992	0.00943672	0.0494047	0.0358181	FLNA/HIPK3/SOX17/SREBF1/SRF	5
GO:0033688	regulation of osteoblast proliferation	5/994	23/16992	0.00943672	0.0494047	0.0358181	ABL1/BCL2/CYR61/SFRP1/TMEM119	5
GO:0043567	regulation of insulin-like growth factor receptor signaling pathway	5/994	23/16992	0.00943672	0.0494047	0.0358181	AR/BMP5/CDH3/CILP/IGFBP5	5
GO:0071526	semaphorin-plexin signaling pathway	5/994	23/16992	0.00943672	0.0494047	0.0358181	FLNA/HAND2/NRP2/PLXNA1/SEMA3E	5
GO:0072215	regulation of metanephros development	5/994	23/16992	0.00943672	0.0494047	0.0358181	EGR1/FAT4/LIF/MYC/WWTR1	5
GO:0072243	metanephric nephron epithelium development	5/994	23/16992	0.00943672	0.0494047	0.0358181	FAT4/LAMB2/LIF/PKD1/WWTR1	5
GO:0086064	cell communication by electrical coupling involved in cardiac conduction	5/994	23/16992	0.00943672	0.0494047	0.0358181	ATP1A2/CACNA1C/PDE4D/RYR2/SLC8A1	5
GO:0048368	lateral mesoderm development	4/994	15/16992	0.00945253	0.0494047	0.0358181	FGFR1/FOXF1/SHH/TBX20	4
GO:0050651	dermatan sulfate proteoglycan biosynthetic process	4/994	15/16992	0.00945253	0.0494047	0.0358181	CSGALNACT1/CSPG4/DCN/UST	4
GO:0072109	glomerular mesangium development	4/994	15/16992	0.00945253	0.0494047	0.0358181	ACTA2/CD34/EGR1/PDGFD	4
GO:0072160	nephron tubule epithelial cell differentiation	4/994	15/16992	0.00945253	0.0494047	0.0358181	FAT4/LIF/MEF2C/WWTR1	4
GO:0008360	regulation of cell shape	16/994	143/16992	0.00949592	0.04958	0.0359451	BVES/CCL2/CDC42EP3/DLC1/FERMT2/FYN/IL6/ITGA7/LPAR1/PALM/PARVA/PLEKHO1/RHOJ/SEMA3E/SHROOM3/TPM1	16
GO:0072089	stem cell proliferation	13/994	107/16992	0.00956932	0.0499113	0.0361853	ASPM/CD34/EML1/EPCAM/FGF2/FGFR1/HHIP/LRRK2/NES/RACGAP1/SFRP2/SHH/SOX17	13

## Sheet: GO-CC
ID	Description	GeneRatio	BgRatio	pvalue	p.adjust	qvalue	geneID	Count
GO:0044449	contractile fiber part	55/1032	204/18122	7.04393e-23	3.42335e-20	2.41718e-20	ABCC9/ACTA2/ACTC1/ACTN2/AHNAK/ANK2/ARHGEF25/ATP2B4/BIN1/CACNA1C/CASQ2/CFL2/CRYAB/DES/DMD/FBXL22/FBXO32/FERMT2/FLNA/FLNC/HDAC4/ILK/JPH2/KLHL41/LMOD1/LMOD3/MYH11/MYH2/MYH3/MYL9/MYOM1/MYZAP/NEXN/PALLD/PARVA/PDE4B/PDLIM3/PGM5/PPP1R12A/PPP1R12B/RYR2/SLC8A1/SOR	55
GO:0043292	contractile fiber	56/1032	219/18122	4.71951e-22	1.14684e-19	8.09769e-20	ABCC9/ACTA2/ACTC1/ACTN2/AHNAK/ANK2/ARHGEF25/ATP2B4/BIN1/CACNA1C/CALD1/CASQ2/CFL2/CRYAB/DES/DMD/FBXL22/FBXO32/FERMT2/FLNA/FLNC/HDAC4/ILK/JPH2/KLHL41/LMOD1/LMOD3/MYH11/MYH2/MYH3/MYL9/MYOM1/MYZAP/NEXN/PALLD/PARVA/PDE4B/PDLIM3/PGM5/PPP1R12A/PPP1R12B/RYR2/SLC8	56
GO:0030016	myofibril	54/1032	209/18122	1.54873e-21	2.50894e-19	1.77153e-19	ABCC9/ACTC1/ACTN2/AHNAK/ANK2/ARHGEF25/ATP2B4/BIN1/CACNA1C/CALD1/CASQ2/CFL2/CRYAB/DES/DMD/FBXL22/FBXO32/FERMT2/FLNA/FLNC/HDAC4/ILK/JPH2/KLHL41/LMOD1/LMOD3/MYH2/MYH3/MYL9/MYOM1/MYZAP/NEXN/PALLD/PARVA/PDE4B/PDLIM3/PGM5/PPP1R12A/PPP1R12B/RYR2/SLC8A1/SORBS2/SV	54
GO:0030017	sarcomere	49/1032	187/18122	6.11547e-20	7.43029e-18	5.24643e-18	ABCC9/ACTC1/ACTN2/ANK2/ARHGEF25/ATP2B4/BIN1/CACNA1C/CASQ2/CFL2/CRYAB/DES/DMD/FBXL22/FBXO32/FERMT2/FLNA/FLNC/HDAC4/ILK/JPH2/KLHL41/LMOD1/LMOD3/MYH2/MYH3/MYL9/MYOM1/MYZAP/NEXN/PALLD/PARVA/PDE4B/PDLIM3/PGM5/PPP1R12A/PPP1R12B/RYR2/SLC8A1/SORBS2/SYNE1/SYNPO/SY	49
GO:0042383	sarcolemma	34/1032	118/18122	1.35231e-15	1.31445e-13	9.28115e-14	ABCC9/AHNAK/AKAP6/ANK2/AQP1/ATP1A2/ATP2B4/BIN1/BVES/CACNA1C/CACNA2D1/CACNB2/DES/DMD/DTNA/DYSF/FLNC/KCNB1/KCND3/LAMA2/PGM5/POPDC2/SGCA/SGCB/SGCD/SGCE/SGCG/SLC2A4/SLC8A1/SLMAP/SSPN/SYNM/TGFB3/UTRN	34
GO:0005578	proteinaceous extracellular matrix	62/1032	359/18122	3.2756e-15	2.65324e-13	1.87341e-13	ABI3BP/ADAMTS1/ADAMTS4/ADAMTS8/ADAMTS9/ADAMTSL3/AGRN/CCDC80/CILP/COL10A1/COL11A1/COL14A1/COL19A1/COL21A1/COL4A6/COL7A1/CRISPLD2/CRTAP/CTGF/DCN/DPT/ELN/EMILIN1/FBLN2/FBLN5/FBN1/GPC6/HMCN2/HPSE2/HSPG2/LAMA2/LAMA4/LAMB2/LAMC3/LRFN5/LTBP4/MAMDC2/MATN2/MFAP2/M	62
GO:0031674	I band	35/1032	132/18122	8.56674e-15	5.94777e-13	4.19964e-13	ACTC1/ACTN2/ANK2/ATP2B4/BIN1/CACNA1C/CASQ2/CFL2/CRYAB/DES/DMD/FBXL22/FBXO32/FERMT2/FLNA/FLNC/HDAC4/JPH2/MYL9/MYOM1/MYZAP/NEXN/PALLD/PARVA/PDE4B/PDLIM3/PGM5/PPP1R12A/PPP1R12B/RYR2/SLC8A1/SORBS2/SYNPO/SYNPO2/TRIM63	35
GO:0030018	Z disc	32/1032	118/18122	6.09497e-14	3.70269e-12	2.61442e-12	ACTN2/ANK2/ATP2B4/BIN1/CACNA1C/CASQ2/CFL2/DES/DMD/FBXL22/FBXO32/FLNA/FLNC/HDAC4/JPH2/MYL9/MYOM1/MYZAP/NEXN/PALLD/PARVA/PDE4B/PDLIM3/PGM5/PPP1R12A/PPP1R12B/RYR2/SLC8A1/SORBS2/SYNPO/SYNPO2/TRIM63	32
GO:0015629	actin cytoskeleton	68/1032	445/18122	7.52375e-14	4.06282e-12	2.8687e-12	ABL1/ABLIM1/ACTA2/ACTC1/ACTG2/ACTN2/ADAM8/AHNAK/AKAP13/ARHGAP6/BIN1/CALD1/CAP2/CDC42BPA/CDC42EP3/CFL2/CGNL1/CLDN5/CLIC4/CORO1C/CRYAB/DDR2/DENND2A/DLC1/DPYSL3/DSTN/EPB41L2/FERMT2/FILIP1/FLNA/FSCN1/FYN/GSN/HDAC4/HSPB7/ILK/KNTC1/LMOD1/MYADM/MYH11/MYH2/MYH3/M	68
GO:0000779	condensed chromosome, centromeric region	28/1032	115/18122	3.81543e-11	1.8543e-09	1.3093e-09	AURKA/AURKB/BIRC5/BUB1/BUB1B/CCNB1/CDT1/CENPA/CENPE/CENPF/CENPU/DYNC1I1/HJURP/KIF2C/KNL1/KNTC1/MAD2L1/NCAPD2/NCAPG/NDC80/NEK2/NUF2/PLK1/SKA1/SKA3/SPAG5/SPC24/ZWINT	28
GO:0000775	chromosome, centromeric region	36/1032	188/18122	1.12097e-10	4.95266e-09	3.497e-09	AURKA/AURKB/BIRC5/BUB1/BUB1B/CCNB1/CDCA5/CDCA8/CDT1/CENPA/CENPE/CENPF/CENPU/DYNC1I1/HELLS/HJURP/KIF22/KIF2C/KNL1/KNTC1/MAD2L1/MKI67/NCAPD2/NCAPG/NDC80/NEK2/NUF2/PLK1/PPP1R12A/RCC2/SKA1/SKA3/SPAG5/SPC24/TTK/ZWINT	36
GO:0000793	condensed chromosome	37/1032	209/18122	6.3678e-10	2.57896e-08	1.82097e-08	AURKA/AURKB/BIRC5/BUB1/BUB1B/CCNB1/CDCA5/CDT1/CENPA/CENPE/CENPF/CENPU/DYNC1I1/FANCD2/H2AFX/HJURP/KIF2C/KNL1/KNTC1/MAD2L1/MKI67/NCAPD2/NCAPG/NCAPG2/NCAPH/NDC80/NEK2/NUF2/P3H4/PLK1/RCC1/SKA1/SKA3/SPAG5/SPC24/TOP2A/ZWINT	37
GO:0000776	kinetochore	28/1032	130/18122	8.11447e-10	3.03356e-08	2.14196e-08	AURKB/BIRC5/BUB1/BUB1B/CCNB1/CDT1/CENPA/CENPE/CENPF/CENPU/DYNC1I1/HJURP/KIF22/KIF2C/KNL1/KNTC1/MAD2L1/NDC80/NEK2/NUF2/PLK1/PPP1R12A/SKA1/SKA3/SPAG5/SPC24/TTK/ZWINT	28
GO:0000940	condensed chromosome outer kinetochore	9/1032	12/18122	1.14662e-09	3.98043e-08	2.81052e-08	BUB1/BUB1B/CCNB1/CENPE/CENPF/NDC80/PLK1/SKA1/SKA3	9
GO:0000777	condensed chromosome kinetochore	24/1032	103/18122	2.45863e-09	7.96595e-08	5.62465e-08	BIRC5/BUB1/BUB1B/CCNB1/CDT1/CENPA/CENPE/CENPF/CENPU/DYNC1I1/HJURP/KIF2C/KNL1/KNTC1/MAD2L1/NDC80/NEK2/NUF2/PLK1/SKA1/SKA3/SPAG5/SPC24/ZWINT	24
GO:0005819	spindle	45/1032	301/18122	2.70002e-09	8.20131e-08	5.79083e-08	ASPM/AURKA/AURKB/BIRC5/BUB1B/CCNB1/CDC20/CDC6/CDCA8/CDK1/CENPE/CENPF/CKAP2L/DLGAP5/DYNC1I1/ECT2/EML1/FRY/GEM/HSPA2/KIF11/KIF14/KIF15/KIF18B/KIF20A/KIF22/KIF23/KIF4A/KIFC1/KNTC1/LATS2/MAD2L1/NEK2/NUSAP1/PLK1/PRC1/RACGAP1/RCC2/SKA1/SKA3/SPAG5/TACC3/TBL1X/TP	45
GO:0005912	adherens junction	61/1032	490/18122	6.96129e-09	1.99011e-07	1.40519e-07	ACTC1/ACTN2/AHNAK/AKAP12/ANXA6/CD200/CD99L2/CDCA3/CDH3/CNN1/CORO1C/CSPG4/CSRP1/DDR2/DES/DIXDC1/DLC1/EPB41L2/FERMT2/FHL1/FLNA/FLNC/GSN/GYPC/HSPG2/ILK/ITGA1/ITGA5/ITGA8/KIAA1462/KIF23/LIMS2/LPP/MCAM/MPP7/NEXN/NFASC/PALLD/PARVA/PDLIM7/PGM5/PHLDB2/PLAU/PLPP3/	61
GO:0030496	midbody	28/1032	145/18122	1.0738e-08	2.89927e-07	2.04714e-07	ASPM/AURKA/AURKB/BIRC5/CDCA8/CDK1/CENPE/CENPF/CEP55/CLIC4/ECT2/GEM/KIF13A/KIF14/KIF20A/KIF23/KIF4A/KLHL13/NEK2/PLK1/PRC1/PTCH1/RACGAP1/RCC2/SPAG5/SPG20/SVIL/TACC1	28
GO:0051233	spindle midzone	12/1032	28/18122	1.42035e-08	3.63311e-07	2.56529e-07	AURKA/AURKB/BUB1B/CDC6/CDCA8/CENPE/EML1/GEM/KIF14/PLK1/RACGAP1/RCC2	12
GO:0005874	microtubule	51/1032	389/18122	2.25623e-08	5.48264e-07	3.87122e-07	ASPM/AURKA/AURKB/BIRC5/CDK1/CENPE/DPYSL2/DYNC1I1/EML1/GABARAPL1/GTSE1/KIF11/KIF13A/KIF14/KIF15/KIF18B/KIF20A/KIF22/KIF23/KIF26B/KIF2C/KIF4A/KIFC1/KIFC2/KNTC1/MAP1A/MAP1B/MAPRE2/MAPT/NEK2/NUSAP1/PBXIP1/PLK1/PRC1/RACGAP1/RASSF3/RCC2/ROR2/SHROOM3/SKA1/SKA3/S	51
GO:0044420	extracellular matrix component	24/1032	119/18122	4.99782e-08	1.15664e-06	8.16686e-07	ADAMTS1/AGRN/CCDC80/COL11A1/COL14A1/COL4A6/COL7A1/ELN/EMILIN1/FBLN5/FBN1/HMCN2/HSPG2/LAMA2/LAMA4/LAMB2/LAMC3/MATN2/MFAP2/MFAP4/MFAP5/SMOC2/THSD4/TNXB	24
GO:0030055	cell-substrate junction	50/1032	398/18122	1.21273e-07	2.67903e-06	1.89163e-06	ACTC1/ACTN2/AHNAK/AKAP12/ANXA6/CD99L2/CNN1/CORO1C/CSPG4/CSRP1/DDR2/DIXDC1/DLC1/DMD/EPB41L2/FERMT2/FHL1/FLNA/FLNC/GSN/HSPG2/ILK/ITGA1/ITGA5/ITGA8/KIF23/LIMS2/LPP/MCAM/NEXN/NFASC/PALLD/PARVA/PDLIM7/PGM5/PHLDB2/PLAU/PPP1R12A/RHOB/RND3/SORBS1/SORBS2/SVIL/SYNP	50
GO:0005925	focal adhesion	49/1032	390/18122	1.6162e-07	3.4151e-06	2.41135e-06	ACTC1/ACTN2/AHNAK/AKAP12/ANXA6/CD99L2/CNN1/CORO1C/CSPG4/CSRP1/DDR2/DIXDC1/DLC1/EPB41L2/FERMT2/FHL1/FLNA/FLNC/GSN/HSPG2/ILK/ITGA1/ITGA5/ITGA8/KIF23/LIMS2/LPP/MCAM/NEXN/NFASC/PALLD/PARVA/PDLIM7/PGM5/PHLDB2/PLAU/PPP1R12A/RHOB/RND3/SORBS1/SORBS2/SVIL/SYNPO2/T	49
GO:0005924	cell-substrate adherens junction	49/1032	393/18122	2.04481e-07	4.14074e-06	2.92372e-06	ACTC1/ACTN2/AHNAK/AKAP12/ANXA6/CD99L2/CNN1/CORO1C/CSPG4/CSRP1/DDR2/DIXDC1/DLC1/EPB41L2/FERMT2/FHL1/FLNA/FLNC/GSN/HSPG2/ILK/ITGA1/ITGA5/ITGA8/KIF23/LIMS2/LPP/MCAM/NEXN/NFASC/PALLD/PARVA/PDLIM7/PGM5/PHLDB2/PLAU/PPP1R12A/RHOB/RND3/SORBS1/SORBS2/SVIL/SYNPO2/T	49
GO:0043034	costamere	9/1032	19/18122	3.34553e-07	6.5037e-06	4.59217e-06	AHNAK/ANK2/DMD/FLNC/ILK/PGM5/SVIL/SYNM/VCL	9
GO:0005875	microtubule associated complex	25/1032	144/18122	5.50034e-07	1.02814e-05	7.25955e-06	AURKA/AURKB/BIRC5/CDCA8/CENPE/DYNC1I1/EML1/KIF11/KIF13A/KIF14/KIF15/KIF18B/KIF20A/KIF22/KIF23/KIF26B/KIF2C/KIF4A/KIFC1/KIFC2/LRP8/MAP1A/MAP1B/MAPT/WDR34	25
GO:0030315	T-tubule	13/1032	44/18122	6.10446e-07	1.08722e-05	7.6767e-06	AHNAK/AKAP6/ANK2/ATP1A2/ATP2B4/BIN1/CACNA1C/CACNA2D1/CACNB2/DYSF/SLC2A4/SLC8A1/TGFB3	13
GO:0098687	chromosomal region	44/1032	349/18122	6.26381e-07	1.08722e-05	7.6767e-06	AURKA/AURKB/BIRC5/BUB1/BUB1B/CCNB1/CDCA5/CDCA8/CDK1/CDT1/CENPA/CENPE/CENPF/CENPU/DYNC1I1/FEN1/H2AFX/HELLS/HJURP/KIF22/KIF2C/KNL1/KNTC1/MAD2L1/MCM2/MCM4/MKI67/NCAPD2/NCAPG/NDC80/NEK2/NUF2/PCNA/PLK1/POLD1/PPP1R12A/RCC2/RECQL4/SKA1/SKA3/SPAG5/SPC24/TTK/ZWINT	44
GO:0005876	spindle microtubule	14/1032	52/18122	7.98437e-07	1.33807e-05	9.44793e-06	AURKA/AURKB/CDK1/KIF11/KIF18B/KIF4A/KNTC1/NUSAP1/PLK1/PRC1/SKA1/SKA3/SPAG5/TBL1X	14
GO:0016010	dystrophin-associated glycoprotein complex	9/1032	21/18122	9.59571e-07	1.4731e-05	1.04013e-05	DMD/PGM5/SGCA/SGCB/SGCD/SGCE/SGCG/SSPN/UTRN	9
GO:0090665	glycoprotein complex	9/1032	21/18122	9.59571e-07	1.4731e-05	1.04013e-05	DMD/PGM5/SGCA/SGCB/SGCD/SGCE/SGCG/SSPN/UTRN	9
GO:0072686	mitotic spindle	16/1032	68/18122	9.69941e-07	1.4731e-05	1.04013e-05	ASPM/AURKA/AURKB/CDK1/CENPE/CKAP2L/ECT2/EML1/GEM/KIF22/KIF23/MAD2L1/RACGAP1/RCC2/SPAG5/TPX2	16
GO:0042641	actomyosin	15/1032	61/18122	1.1553e-06	1.70144e-05	1.20137e-05	ABLIM1/ACTC1/CDC42BPA/FERMT2/FSCN1/HDAC4/ILK/MYL9/MYLK/PDLIM7/PGM5/ROR1/SORBS1/SYNPO2/TPM1	15
GO:0005871	kinesin complex	14/1032	54/18122	1.31642e-06	1.8817e-05	1.32864e-05	CENPE/KIF11/KIF13A/KIF14/KIF15/KIF18B/KIF20A/KIF22/KIF23/KIF26B/KIF2C/KIF4A/KIFC1/KIFC2	14
GO:0031252	cell leading edge	43/1032	355/18122	2.43914e-06	3.38692e-05	2.39146e-05	ABL1/ABLIM1/ACTA2/ACTC1/ACTG2/AMOTL1/APBB1/ARHGEF26/CDC42BPA/CORO1C/CSPG4/CXCR4/DLC1/DPYSL3/DYSF/FERMT2/FSCN1/GABARAPL1/GSN/ILK/ITGA5/ITGA8/KANK1/KLHL41/LDB2/MAPT/MYADM/MYLK/NME1/PALLD/PALM/PDLIM7/PHLDB2/PLEKHO1/PSD/RAC3/RASGRP2/SGCE/SORBS2/TACR3/TLN1/TPM	43
GO:0098794	postsynapse	47/1032	407/18122	3.19666e-06	4.31549e-05	3.04711e-05	ACTN2/ADGRB3/ANK2/APBB1/ATP1A2/CACNA1C/CAMK2A/CAP2/CHRM2/CHRM3/CPEB1/CPEB4/CRYAB/DCLK1/DMD/EPHA7/FAIM2/FYN/GRASP/GRIN2D/IGSF9B/ITGA8/ITPR1/KCNB1/KCTD12/LAMA2/LPAR1/LRP8/LRRK2/MAP1B/MEF2C/MPDZ/NCS1/P2RX1/PALM/PDE4B/PJA2/PLCB4/PRKAR2B/PSD/PTCH1/SLC8A1/SSPN/	47
GO:0000780	condensed nuclear chromosome, centromeric region	8/1032	19/18122	4.62984e-06	6.08135e-05	4.29396e-05	AURKA/AURKB/BUB1/BUB1B/CCNB1/CENPA/NDC80/PLK1	8
GO:0000922	spindle pole	22/1032	135/18122	7.55799e-06	9.66627e-05	6.82522e-05	ASPM/AURKA/AURKB/CCNB1/CDC20/CDC6/CENPF/CKAP2L/DLGAP5/DYNC1I1/EML1/FRY/KIF11/KNTC1/LATS2/MAD2L1/NEK2/PLK1/PRC1/SPAG5/TACC3/TPX2	22
GO:0030863	cortical cytoskeleton	16/1032	80/18122	9.34223e-06	0.000115561	8.15963e-05	ACTN2/AKAP13/CALD1/CAP2/CLDN5/DLC1/DSTN/EPB41L2/FLNA/GSN/GYPC/MYADM/MYH2/MYZAP/TMOD1/UTRN	16
GO:0030864	cortical actin cytoskeleton	13/1032	55/18122	9.51123e-06	0.000115561	8.15963e-05	ACTN2/AKAP13/CALD1/CAP2/CLDN5/DLC1/DSTN/EPB41L2/GSN/MYADM/MYH2/MYZAP/UTRN	13
GO:0001725	stress fiber	12/1032	49/18122	1.41682e-05	0.000163947	0.00011576	ABLIM1/FERMT2/FSCN1/ILK/MYL9/MYLK/PDLIM7/PGM5/ROR1/SORBS1/SYNPO2/TPM1	12
GO:0097517	contractile actin filament bundle	12/1032	49/18122	1.41682e-05	0.000163947	0.00011576	ABLIM1/FERMT2/FSCN1/ILK/MYL9/MYLK/PDLIM7/PGM5/ROR1/SORBS1/SYNPO2/TPM1	12
GO:0045121	membrane raft	35/1032	285/18122	1.53474e-05	0.000173461	0.000122478	AHNAK/AKAP6/ANK2/ATP1A2/ATP2B4/BVES/CD55/CLIP3/CNTN1/CORO1C/DLC1/DMD/EDNRB/EHD2/FAIM2/FYN/ITGA1/KCNMA1/LRP8/LRRK2/MYADM/P2RX1/PECAM1/PRKAR2B/PTCH1/PTGIS/PTGS2/S1PR1/SGCA/SHH/SLC2A4/SORBS1/STOM/TGFBR2/TUBA1A	35
GO:0098857	membrane microdomain	35/1032	286/18122	1.6554e-05	0.000182846	0.000129105	AHNAK/AKAP6/ANK2/ATP1A2/ATP2B4/BVES/CD55/CLIP3/CNTN1/CORO1C/DLC1/DMD/EDNRB/EHD2/FAIM2/FYN/ITGA1/KCNMA1/LRP8/LRRK2/MYADM/P2RX1/PECAM1/PRKAR2B/PTCH1/PTGIS/PTGS2/S1PR1/SGCA/SHH/SLC2A4/SORBS1/STOM/TGFBR2/TUBA1A	35
GO:0032432	actin filament bundle	13/1032	58/18122	1.76411e-05	0.000190523	0.000134526	ABLIM1/CRYAB/FERMT2/FSCN1/ILK/MYL9/MYLK/PDLIM7/PGM5/ROR1/SORBS1/SYNPO2/TPM1	13
GO:0016528	sarcoplasm	14/1032	67/18122	1.98535e-05	0.000209757	0.000148106	AKAP6/CACNA2D1/CASQ2/DMPK/FLNC/GSN/ITPR1/JPH2/KLHL41/MRVI1/PLN/RYR2/RYR3/THBS1	14
GO:0030425	dendrite	49/1032	462/18122	2.05035e-05	0.000212015	0.000149701	ACTN2/ADCY9/APBB1/ATP1A2/CCL2/CHRM2/CHRM3/CKB/CLU/CPEB1/CPEB4/CPNE6/CRYAB/EPHA7/EPHB2/FLNA/FYN/GABARAPL1/GNAO1/IGSF9/IGSF9B/IL6ST/ILK/KCNB1/KCND3/LAMA2/LPAR1/LRP8/LRRK2/MAP1B/MAPT/MPDZ/NCS1/PALM/PDE4B/PLCB4/PRKAR2B/PSD/PTCH1/ROR2/SAMD4A/SGCE/SLC8A1/SYNPO/	49
GO:0044454	nuclear chromosome part	51/1032	493/18122	2.73785e-05	0.000277207	0.000195732	AR/ASF1B/AURKA/AURKB/BUB1/BUB1B/CALCOCO1/CBX7/CCNB1/CDC45/CDCA5/CDK1/CENPA/CHAF1B/E2F1/ESR1/EZH2/FEN1/GINS1/H2AFX/HAND2/HIST1H1C/HIST1H2AC/HIST3H2A/JUN/JUNB/JUND/KLF2/KLF4/MCM10/MCM2/MCM4/MYOCD/NACC2/NCAPD2/NCAPH/NDC80/NFATC1/NFATC2/ORC6/P3H4/PCNA/PLK1/PO	51
GO:0005901	caveola	14/1032	72/18122	4.64747e-05	0.000460953	0.000325473	AKAP6/ATP1A2/ATP2B4/BVES/CORO1C/DLC1/EHD2/KCNMA1/LRP8/LRRK2/PTCH1/PTGIS/PTGS2/TGFBR2	14
GO:0005911	cell-cell junction	43/1032	406/18122	6.69279e-05	0.00065054	0.000459337	AHNAK/AKAP6/AMOTL1/ANK2/ATP1A2/BVES/CD200/CDC42BPA/CDCA3/CDH3/CGNL1/CLDN5/CLIC4/DES/ECT2/EPCAM/FLNA/FSCN1/GYPC/ILK/IQGAP3/ITGA5/JAM2/JAM3/KIAA1462/MPDZ/MPP7/MYADM/MYH2/NFASC/PARD3B/PDLIM7/PGM5/PMP22/SCN4B/SGCA/SHROOM3/SLC8A1/SMAD7/SORBS1/SYNPO/TLN1/VCL	43
GO:0005884	actin filament	15/1032	84/18122	7.09816e-05	0.000676412	0.000477605	ACTC1/ACTN2/AKAP13/ARHGAP6/DPYSL3/FERMT2/FLNA/FSCN1/FYN/LMOD1/PALLD/RAC3/TMOD1/TPM1/TPM2	15
GO:0031672	A band	10/1032	41/18122	7.62539e-05	0.000712681	0.000503214	ANK2/CRYAB/HDAC4/KLHL41/LMOD3/MYH2/MYOM1/PPP1R12A/PPP1R12B/TRIM63	10
GO:0001527	microfibril	5/1032	10/18122	0.000117493	0.00107739	0.000760727	FBN1/MFAP2/MFAP4/MFAP5/THSD4	5
GO:0016529	sarcoplasmic reticulum	12/1032	60/18122	0.000120438	0.00108394	0.000765356	AKAP6/CACNA2D1/CASQ2/DMPK/ITPR1/JPH2/KLHL41/MRVI1/PLN/RYR2/RYR3/THBS1	12
GO:0044297	cell body	48/1032	483/18122	0.000125154	0.0011059	0.000780864	ACTA2/ACTC1/ACTG2/APBB1/AURKA/CCL2/CHRM2/CIT/CKB/CPEB1/CPNE6/CRYAB/CYGB/DPYSL3/EPHA7/EPHB2/FLNA/GABARAPL1/GNAO1/IGSF9B/IL6ST/ILK/ITGA1/ITGA8/ITPR3/KCNB1/LPAR1/LRP8/LRRK2/MAPT/NDN/NRXN1/OLFM1/PAM/PDE1A/PRKAR2B/RAC3/RBFOX3/ROR2/SYNPO/SYT11/SYT7/TACR3/TGFB3/	48
GO:0097060	synaptic membrane	33/1032	291/18122	0.000128322	0.00111365	0.000786335	ANK2/APBB1/CAMK2A/CHRM2/CHRM3/CPEB1/CPEB4/CRYAB/DMD/EPHA7/ERC1/FAIM2/FOSL1/GRASP/GRIN2D/IGSF9B/ITGA8/KCNB1/KCTD12/MPDZ/NCS1/NRXN1/P2RX1/PALM/PDE2A/PJA2/SLC8A1/SSPN/SYNE1/SYNPO/SYT11/SYT7/UTRN	33
GO:0032279	asymmetric synapse	25/1032	199/18122	0.000169669	0.00144665	0.00102146	CACNA1C/CAMK2A/CAP2/CHRM2/CHRM3/CPEB1/CPEB4/CRYAB/DCLK1/FYN/IGSF9B/ITGA8/ITPR1/LRP8/MAP1B/MPDZ/NCS1/PALM/PDE4B/PJA2/PLCB4/PSD/PTCH1/SYNPO/SYT11	25
GO:0098984	neuron to neuron synapse	25/1032	201/18122	0.000198677	0.00166477	0.00117547	CACNA1C/CAMK2A/CAP2/CHRM2/CHRM3/CPEB1/CPEB4/CRYAB/DCLK1/FYN/IGSF9B/ITGA8/ITPR1/LRP8/MAP1B/MPDZ/NCS1/PALM/PDE4B/PJA2/PLCB4/PSD/PTCH1/SYNPO/SYT11	25
GO:0005891	voltage-gated calcium channel complex	9/1032	39/18122	0.000273409	0.00225215	0.00159021	CACNA1C/CACNA1H/CACNA2D1/CACNB2/CACNB4/CASQ2/HSPA2/PDE4B/PDE4D	9
GO:0044853	plasma membrane raft	14/1032	85/18122	0.000296704	0.0024033	0.00169694	AKAP6/ATP1A2/ATP2B4/BVES/CORO1C/DLC1/EHD2/KCNMA1/LRP8/LRRK2/PTCH1/PTGIS/PTGS2/TGFBR2	14
GO:0098589	membrane region	37/1032	361/18122	0.000399985	0.00318677	0.00225013	AHNAK/AKAP6/ANK2/ATP1A2/ATP2B4/BVES/CD55/CLIP3/CNTN1/CORO1C/DLC1/DMD/EDNRB/EHD2/FAIM2/FNBP1/FYN/ITGA1/KCNMA1/LDLR/LRP8/LRRK2/MYADM/P2RX1/PECAM1/PRKAR2B/PTCH1/PTGIS/PTGS2/S1PR1/SGCA/SHH/SLC2A4/SORBS1/STOM/TGFBR2/TUBA1A	37
GO:0000794	condensed nuclear chromosome	14/1032	88/18122	0.000428627	0.00335989	0.00237237	AURKA/AURKB/BUB1/BUB1B/CCNB1/CENPA/H2AFX/NCAPD2/NCAPH/NDC80/NEK2/P3H4/PLK1/RCC1	14
GO:0044448	cell cortex part	17/1032	121/18122	0.000497561	0.00383833	0.00271019	ACTN2/AKAP13/CALD1/CAP2/CLDN5/DLC1/DSTN/EPB41L2/FLNA/GSN/GYPC/MYADM/MYH2/MYZAP/PHLDB2/TMOD1/UTRN	17
GO:0034704	calcium channel complex	11/1032	60/18122	0.000506548	0.0038466	0.00271603	AKAP6/CACNA1C/CACNA1H/CACNA2D1/CACNB2/CACNB4/CASQ2/HSPA2/PDE4B/PDE4D/RYR2	11
GO:0043025	neuronal cell body	41/1032	422/18122	0.000599987	0.00448606	0.00316754	APBB1/AURKA/CCL2/CHRM2/CIT/CKB/CPEB1/CPNE6/CRYAB/CYGB/EPHA7/EPHB2/FLNA/IGSF9B/IL6ST/ILK/ITGA1/ITGA8/ITPR3/KCNB1/LPAR1/LRP8/LRRK2/MAPT/NDN/NRXN1/OLFM1/PAM/PDE1A/PRKAR2B/RAC3/RBFOX3/ROR2/SYNPO/SYT7/TACR3/TGFB3/TIMP2/TMEM100/TPX2/TTLL7	41
GO:0099568	cytoplasmic region	31/1032	292/18122	0.000637624	0.00469523	0.00331524	ACTN2/AKAP12/AKAP13/CALD1/CAP2/CLDN5/COL10A1/CTGF/DLC1/DSTN/EPB41L2/FERMT2/FLNA/FNBP1/FRY/GABARAPL1/GSN/GYPC/HMCN2/KIF4A/LRRK2/MAPT/MELK/MYADM/MYH2/MYZAP/PDZD4/PHLDB2/TMOD1/UTRN/WLS	31
GO:0014069	postsynaptic density	23/1032	195/18122	0.000746625	0.00537617	0.00379604	CACNA1C/CAMK2A/CAP2/CPEB1/CPEB4/CRYAB/DCLK1/FYN/IGSF9B/ITGA8/ITPR1/LRP8/MAP1B/MPDZ/NCS1/PALM/PDE4B/PJA2/PLCB4/PSD/PTCH1/SYNPO/SYT11	23
GO:0005604	basement membrane	14/1032	93/18122	0.000759181	0.00537617	0.00379604	ADAMTS1/AGRN/CCDC80/COL4A6/COL7A1/FBN1/HMCN2/HSPG2/LAMA2/LAMA4/LAMB2/LAMC3/MATN2/SMOC2	14
GO:0098797	plasma membrane protein complex	26/1032	232/18122	0.000763283	0.00537617	0.00379604	ABCC9/ADAM8/C7/CORO1C/DMD/EMILIN1/GNAL/GNAO1/GNG11/GNG7/ITGA1/ITGA5/ITGA7/ITGA8/ITGA9/MPP7/PGM5/SGCA/SGCB/SGCD/SGCE/SGCG/SMAD7/SSPN/TGFBR3/UTRN	26
GO:0099572	postsynaptic specialization	23/1032	197/18122	0.000859768	0.0059369	0.00419196	CACNA1C/CAMK2A/CAP2/CPEB1/CPEB4/CRYAB/DCLK1/FYN/IGSF9B/ITGA8/ITPR1/LRP8/MAP1B/MPDZ/NCS1/PALM/PDE4B/PJA2/PLCB4/PSD/PTCH1/SYNPO/SYT11	23
GO:0005938	cell cortex	26/1032	234/18122	0.000867325	0.0059369	0.00419196	ACTN2/AKAP12/AKAP13/CALD1/CAP2/CLDN5/COL10A1/CTGF/DLC1/DSTN/EPB41L2/FERMT2/FLNA/FNBP1/FRY/GSN/GYPC/HMCN2/MELK/MYADM/MYH2/MYZAP/PDZD4/PHLDB2/TMOD1/UTRN	26
GO:0032590	dendrite membrane	6/1032	22/18122	0.00113956	0.00748786	0.00528707	GABARAPL1/ITGA8/PALM/SGCE/TACR3/WLS	6
GO:1990752	microtubule end	6/1032	22/18122	0.00113956	0.00748786	0.00528707	ASPM/KIF18B/KIF2C/MAPRE2/SPAG5/SVIL	6
GO:0033017	sarcoplasmic reticulum membrane	8/1032	38/18122	0.00114013	0.00748786	0.00528707	AKAP6/CASQ2/DMPK/JPH2/KLHL41/PLN/RYR2/RYR3	8
GO:0043209	myelin sheath	20/1032	167/18122	0.00133122	0.00862634	0.00609094	ATP1A2/BCL2/CKB/CNRIP1/CNTN1/FSCN1/GNAO1/GSN/ITPR3/JAM3/MPDZ/NFASC/PLP1/PMP2/PMP22/RAP1A/SLC25A4/TPPP/TSPAN2/TUBA1A	20
GO:0005581	collagen trimer	13/1032	88/18122	0.00138158	0.00883482	0.00623814	C1QTNF6/C1QTNF7/COL10A1/COL11A1/COL14A1/COL19A1/COL21A1/COL4A6/COL7A1/COLEC12/DCN/EMILIN1/TNXB	13
GO:0000307	cyclin-dependent protein kinase holoenzyme complex	8/1032	40/18122	0.00162096	0.010231	0.00722395	CCNA2/CCNB1/CCND2/CCNE1/CDK1/CDKN1A/CKS1B/CKS2	8
GO:1990023	mitotic spindle midzone	4/1032	10/18122	0.00166452	0.0103713	0.007323	AURKB/CENPE/EML1/RCC2	4
GO:0005796	Golgi lumen	14/1032	101/18122	0.00172326	0.0106013	0.00748543	AGRN/CSPG4/DCN/F10/GPC6/HSPG2/MMP11/MUC21/OGN/OMD/PRELP/SDC2/SDC3/SOD3	14
GO:0031256	leading edge membrane	17/1032	136/18122	0.00187044	0.0113346	0.00800317	CSPG4/DLC1/FERMT2/GABARAPL1/ITGA5/ITGA8/KANK1/MAPT/NME1/PALM/PLEKHO1/RASGRP2/SGCE/TACR3/TLN1/TPM1/WLS	17
GO:0031253	cell projection membrane	30/1032	299/18122	0.00188909	0.0113346	0.00800317	AQP1/BVES/CA9/CSPG4/CYBRD1/DLC1/DMD/FERMT2/FSCN1/GABARAPL1/GUCA1C/HHIP/ITGA5/ITGA8/KANK1/MAPT/NME1/PALM/PKD1/PLEKHO1/PTCH1/RASGRP2/SGCE/SLC26A6/SLC5A6/TACR3/TLN1/TPM1/UTRN/WLS	30
GO:0000790	nuclear chromatin	30/1032	305/18122	0.0025529	0.0151306	0.0106835	AR/ASF1B/CALCOCO1/CBX7/CDCA5/CENPA/CHAF1B/E2F1/ESR1/EZH2/H2AFX/HAND2/HIST1H1C/HIST1H2AC/HIST3H2A/JUN/JUNB/JUND/KLF2/KLF4/MYOCD/NACC2/NFATC1/NFATC2/RCC1/SATB1/SRF/TCF4/TIMELESS/UHRF1	30
GO:0044291	cell-cell contact zone	10/1032	63/18122	0.0027949	0.016307	0.0115141	AHNAK/AKAP6/ANK2/ATP1A2/DES/JAM3/PGM5/SCN4B/SLC8A1/VCL	10
GO:0000785	chromatin	42/1032	472/18122	0.00281849	0.016307	0.0115141	AR/ASF1B/CALCOCO1/CBX2/CBX6/CBX7/CCND2/CDCA5/CENPA/CENPF/CHAF1B/E2F1/ESR1/EZH2/H2AFX/HAND2/HELLS/HIC1/HIST1H1C/HIST1H2AC/HIST1H2BD/HIST1H2BK/HIST2H2BE/HIST3H2A/JUN/JUNB/JUND/KIF22/KLF2/KLF4/MCM2/MYOCD/NACC2/NFATC1/NFATC2/PLK1/RCC1/SATB1/SRF/TCF4/TIMELESS/	42
GO:1902911	protein kinase complex	13/1032	96/18122	0.00305726	0.0174804	0.0123426	CCNA2/CCNB1/CCND2/CCNE1/CDK1/CDKN1A/CKS1B/CKS2/ERC1/PRKAA2/PRKAG2/SORBS1/TGFBR2	13
GO:0036379	myofilament	5/1032	19/18122	0.00352752	0.0199346	0.0140755	MYOM1/TNNT1/TNNT2/TPM1/TPM2	5
GO:0045211	postsynaptic membrane	23/1032	220/18122	0.00365471	0.020416	0.0144154	ANK2/APBB1/CHRM2/CHRM3/CPEB1/CPEB4/DMD/EPHA7/FAIM2/GRASP/GRIN2D/IGSF9B/KCNB1/KCTD12/MPDZ/NCS1/P2RX1/PJA2/SLC8A1/SSPN/SYNE1/SYNPO/UTRN	23
GO:0043204	perikaryon	14/1032	110/18122	0.00384907	0.0212574	0.0150095	CCL2/CPNE6/CRYAB/ITGA1/ITGA8/KCNB1/LRRK2/NDN/OLFM1/PAM/RBFOX3/SYNPO/TMEM100/TTLL7	14
GO:0014704	intercalated disc	8/1032	46/18122	0.00406834	0.0222159	0.0156863	AKAP6/ANK2/ATP1A2/DES/PGM5/SCN4B/SLC8A1/VCL	8
GO:0031941	filamentous actin	6/1032	28/18122	0.0042956	0.0231963	0.0163786	DPYSL3/FERMT2/FLNA/FSCN1/RAC3/TPM1	6
GO:0032589	neuron projection membrane	7/1032	37/18122	0.00435938	0.0232819	0.0164391	GABARAPL1/ITGA8/MAPT/PALM/SGCE/TACR3/WLS	7
GO:0005614	interstitial matrix	4/1032	13/18122	0.00493991	0.0260956	0.0184257	ABI3BP/CCDC80/SMOC2/VIT	4
GO:0031430	M band	6/1032	29/18122	0.0051598	0.0269641	0.019039	ANK2/CRYAB/KLHL41/LMOD3/MYOM1/TRIM63	6
GO:0031091	platelet alpha granule	12/1032	91/18122	0.00539344	0.0278852	0.0196894	A2M/ACTN2/CFD/CLU/MMRN1/PCDH7/PECAM1/SELP/TGFB3/THBS1/VEGFD/VWF	12
GO:0005813	centrosome	42/1032	492/18122	0.0058424	0.0298885	0.0211039	AURKA/AURKB/CCNB1/CCNB2/CDC20/CDC45/CDK1/CENPF/CEP55/CKAP2L/CLIC4/CPEB1/DLGAP5/DTL/E2F1/FBXL7/KIF13A/KIF15/KIF23/KIF2C/LRRC45/NDC80/NDN/NEK2/PCLAF/PCNA/PDE4B/PDE4D/PLK1/PPP1R12A/PRKACB/PRKAR2B/RAB23/RANBP3L/RGCC/SMAD7/SORBS1/SPAG5/STARD9/STIL/TOP2A/WDR34	42
GO:0045120	pronucleus	4/1032	14/18122	0.00660765	0.0334512	0.0236195	AURKA/CCNA2/CENPF/EZH2	4
GO:0032982	myosin filament	5/1032	22/18122	0.00693201	0.0347315	0.0245234	ACTG2/MYH11/MYH2/MYH3/MYOM1	5
GO:0031965	nuclear membrane	28/1032	300/18122	0.00710902	0.0352549	0.024893	ABL1/AKAP6/AQP1/BCL2/CCND2/DHCR7/DMPK/DTL/DUSP2/EDNRB/GATA6/IFI27/ITPR1/ITPR3/LMNB1/LMNB2/MRGPRF/NR4A1/NRXN1/NUP210/P2RX1/PDE4D/PLCD4/PRICKLE2/PTGDS/RCC1/SYNE1/TMC6	28
GO:0043296	apical junction complex	15/1032	131/18122	0.00763636	0.0374876	0.0264695	AMOTL1/BVES/CGNL1/CLDN5/ECT2/EPCAM/JAM2/JAM3/MPDZ/MPP7/PARD3B/PMP22/SHROOM3/SORBS1/SYNPO	15
GO:0002102	podosome	6/1032	32/18122	0.00851383	0.0409676	0.0289266	ADAM8/FSCN1/GSN/PALLD/SVIL/VCL	6
GO:0008305	integrin complex	6/1032	32/18122	0.00851383	0.0409676	0.0289266	EMILIN1/ITGA1/ITGA5/ITGA7/ITGA8/ITGA9	6
GO:0043197	dendritic spine	14/1032	122/18122	0.00957498	0.045622	0.032213	ACTN2/APBB1/ATP1A2/CRYAB/LAMA2/LPAR1/MAP1B/PALM/PDE4B/PRKAR2B/PSD/SLC8A1/SYNPO/SYT11	14

## Sheet: GO-MF
ID	Description	GeneRatio	BgRatio	pvalue	p.adjust	qvalue	geneID	Count
GO:0005539	glycosaminoglycan binding	45/980	201/16982	2.06563e-15	1.74339e-12	1.49378e-12	ABI3BP/ADAMTS1/ADAMTS8/AGRN/CCDC80/CCL2/CFH/CLEC3B/CRISPLD2/CTGF/CTSG/CYR61/DCN/DPYSL3/FBN1/FGF10/FGF2/FGF7/FGFR1/FSTL1/GREM2/HBEGF/HMMR/JCHAIN/LIPG/LTBP4/MDK/NDNF/NRP2/PCOLCE2/PLA2G5/PODXL2/PRELP/PTCH1/SELP/SFRP1/SHH/SLIT2/SMOC2/SOD3/TGFBR2/TGFBR3/THBS1/	45
GO:0008201	heparin binding	35/980	152/16982	1.1562e-12	4.18232e-10	3.5835e-10	ABI3BP/ADAMTS1/ADAMTS8/CCDC80/CCL2/CFH/CLEC3B/CRISPLD2/CTGF/CTSG/CYR61/FBN1/FGF10/FGF2/FGF7/FGFR1/FSTL1/GREM2/HBEGF/LIPG/MDK/NDNF/NRP2/PCOLCE2/PLA2G5/PRELP/PTCH1/SELP/SFRP1/SLIT2/SMOC2/SOD3/TGFBR3/THBS1/TNXB	35
GO:1901681	sulfur compound binding	43/980	221/16982	1.48661e-12	4.18232e-10	3.5835e-10	ABI3BP/ACACB/ADAMTS1/ADAMTS8/AGRN/CCDC80/CCL2/CD34/CFH/CLEC3B/CRISPLD2/CTGF/CTSG/CYR61/DPYSL3/FBN1/FGF10/FGF2/FGF7/FGFR1/FSTL1/GPC6/GREM2/HBEGF/HPSE2/LIPG/MDK/NDNF/NRP2/PCOLCE2/PLA2G5/PRELP/PTCH1/RCC1/RYR2/SELP/SFRP1/SLIT2/SMOC2/SOD3/TGFBR3/THBS1/TNXB	43
GO:0000982	transcription factor activity, RNA polymerase II core promoter proximal region sequence-specific binding	58/980	367/16982	2.12947e-12	4.49319e-10	3.84986e-10	AR/ATF3/BTG2/EGR1/EGR2/ESR1/ETS2/ETV4/FOS/FOSB/FOSL1/FOXP2/HAND1/HAND2/HLF/JDP2/JUN/JUNB/JUND/KLF4/KLF6/MEF2C/MEF2D/MEIS1/MEIS2/MEOX1/MITF/MYBL2/MYC/MYOCD/NACC2/NDN/NFATC2/NFATC4/NFE2L3/NFIA/NFIB/NFIC/NFIL3/NR2F1/NR4A1/NR4A2/NR4A3/PBX1/PGR/PITX1/PITX2/SOX	58
GO:0001077	transcriptional activator activity, RNA polymerase II core promoter proximal region sequence-specific binding	44/980	256/16982	6.30257e-11	1.06387e-08	9.1155e-09	AR/EGR1/EGR2/ESR1/ETV4/FOS/FOSB/FOSL1/HAND2/HLF/JUN/JUNB/JUND/KLF4/KLF6/MEF2C/MEF2D/MEIS1/MEIS2/MEOX1/MITF/MYBL2/MYC/MYOCD/NDN/NFATC2/NFIA/NFIB/NFIC/NR4A1/NR4A2/NR4A3/PBX1/PGR/PITX1/PITX2/SOX4/SREBF1/SRF/SSBP2/TBX20/TCF21/TCF4/TEF	44
GO:0001228	transcriptional activator activity, RNA polymerase II transcription regulatory region sequence-specific binding	53/980	355/16982	1.70561e-10	2.39922e-08	2.0557e-08	AR/ATF3/EGR1/EGR2/ESR1/ETV4/FOS/FOSB/FOSL1/FOXF1/GATA5/GATA6/HAND2/HLF/IRF5/JUN/JUNB/JUND/KLF4/KLF6/MEF2C/MEF2D/MEIS1/MEIS2/MEOX1/MITF/MYBL2/MYC/MYOCD/NDN/NFATC1/NFATC2/NFIA/NFIB/NFIC/NR4A1/NR4A2/NR4A3/PBX1/PGR/PITX1/PITX2/SOX17/SOX4/SREBF1/SRF/SSBP2/TBX2	53
GO:0015631	tubulin binding	44/980	289/16982	3.3304e-09	4.01551e-07	3.44058e-07	BIRC5/CENPE/CLIP3/CRYAB/DIXDC1/DPYSL2/DYNC1I1/EML1/FYN/GABARAPL1/KIF11/KIF13A/KIF14/KIF15/KIF18B/KIF20A/KIF22/KIF23/KIF26B/KIF2C/KIF4A/KIFC1/KIFC2/LRRK2/MAP1A/MAP1B/MAPRE2/MAPT/NCALD/NDN/NUSAP1/PDE4B/PLK1/PRC1/RACGAP1/RCC2/REEP1/RGS2/SKA1/STARD9/STMN1/SYT	44
GO:0001159	core promoter proximal region DNA binding	49/980	346/16982	5.08182e-09	5.36132e-07	4.5937e-07	AR/ATF3/EGR2/ESR1/ETS2/ETV4/FOS/FOSB/FOSL1/FOXP2/HAND1/JDP2/JUN/JUNB/JUND/KLF4/KLF6/MEF2C/MEF2D/MEIS1/MEIS2/MEOX1/MITF/MYBL2/MYC/MYOCD/NACC2/NDN/NFATC2/NFATC4/NFE2L3/NFIA/NFIB/NFIC/NR2F1/NR4A3/PBX1/PER1/PGR/PITX1/PITX2/RFX2/SREBF1/SRF/SSBP2/TBX20/TCF4/TEA	49
GO:0000987	core promoter proximal region sequence-specific DNA binding	48/980	343/16982	1.07596e-08	1.00901e-06	8.64545e-07	AR/ATF3/EGR2/ESR1/ETS2/ETV4/FOS/FOSB/FOSL1/FOXP2/HAND1/JDP2/JUN/JUNB/JUND/KLF4/KLF6/MEF2C/MEF2D/MEIS1/MEIS2/MEOX1/MITF/MYBL2/MYC/MYOCD/NACC2/NDN/NFATC2/NFATC4/NFE2L3/NFIA/NFIB/NFIC/NR2F1/NR4A3/PBX1/PER1/PGR/PITX1/PITX2/RFX2/SREBF1/SRF/SSBP2/TBX20/TCF4/UHR	48
GO:0003779	actin binding	52/980	400/16982	3.26664e-08	2.75704e-06	2.36229e-06	ABL1/ABLIM1/ACTN2/BIN1/CACNB2/CALD1/CAP2/CFL2/CNN1/CORO1C/CXCR4/DAAM2/DIXDC1/DMD/DSTN/EPB41L2/FLNA/FLNC/FSCN1/GSN/KCNMA1/LMOD1/LMOD3/LRRK2/MAPT/MARCKSL1/MYH11/MYH2/MYH3/MYLK/MYO19/MYOM1/NCALD/NEXN/PALLD/PARVA/SHROOM3/SMTN/SORBS1/SVIL/SYNE1/SYNPO/SYNPO2/TA	52
GO:0000978	RNA polymerase II core promoter proximal region sequence-specific DNA binding	45/980	331/16982	7.41862e-08	5.6921e-06	4.87712e-06	AR/ATF3/EGR2/ESR1/ETS2/ETV4/FOS/FOSB/FOSL1/FOXP2/HAND1/JDP2/JUN/JUNB/JUND/KLF6/MEF2C/MEF2D/MEIS1/MEIS2/MEOX1/MITF/MYBL2/MYC/NACC2/NDN/NFATC2/NFATC4/NFE2L3/NFIA/NFIB/NFIC/NR2F1/NR4A3/PBX1/PER1/PGR/PITX1/PITX2/RFX2/SREBF1/SRF/SSBP2/TBX20/TCF4	45
GO:0008017	microtubule binding	34/980	217/16982	9.96986e-08	7.01214e-06	6.00816e-06	BIRC5/CENPE/CLIP3/CRYAB/DPYSL2/DYNC1I1/EML1/KIF11/KIF13A/KIF14/KIF15/KIF18B/KIF20A/KIF22/KIF23/KIF26B/KIF2C/KIF4A/KIFC1/KIFC2/LRRK2/MAP1A/MAP1B/MAPRE2/MAPT/NUSAP1/PLK1/PRC1/RACGAP1/RCC2/REEP1/SKA1/STARD9/TPPP	34
GO:0005178	integrin binding	21/980	103/16982	3.45691e-07	2.24433e-05	1.92299e-05	ACTN2/ADAMTS8/CTGF/CYR61/EMILIN1/ESM1/FBLN5/FBN1/ILK/ITGA5/JAM3/LAMB2/LTBP4/PLPP3/SFRP2/THBS1/TIMP2/TLN1/TNXB/UTRN/VWF	21
GO:0003682	chromatin binding	55/980	482/16982	1.01266e-06	6.10492e-05	5.23083e-05	APBB1/AR/ATAD2/CALCOCO1/CBX2/CDC45/CDCA5/CDK1/CDT1/CENPA/CENPF/CHAF1B/CKS2/DNMT3B/EGR1/EGR2/ESR1/EXO1/EZH2/FOS/GATA5/GATA6/HDAC4/HIST1H1C/JDP2/JUN/KLF4/MEF2C/MEIS1/MEOX1/NCAPD2/NCAPH/NFATC2/NFIA/PCLAF/PCNA/PER1/PITX2/POLD1/POLQ/PRKAA2/PRKCB/RCC1/SATB1/SET	55
GO:0051015	actin filament binding	23/980	140/16982	5.07562e-06	0.000285588	0.000244698	ABL1/ACTN2/BIN1/CACNB2/CFL2/CORO1C/DSTN/FLNA/FLNC/FSCN1/MYH11/MYH3/MYOM1/NEXN/SHROOM3/SVIL/SYNE1/TAGLN/TLN1/TMOD1/TPM1/TPM2/UTRN	23
GO:0003777	microtubule motor activity	16/980	77/16982	6.55607e-06	0.000345833	0.000296317	CENPE/DYNC1I1/KIF11/KIF13A/KIF14/KIF15/KIF18B/KIF20A/KIF22/KIF23/KIF26B/KIF2C/KIF4A/KIFC1/KIFC2/STARD9	16
GO:0008307	structural constituent of muscle	12/980	46/16982	7.99163e-06	0.000396761	0.000339954	ACTN2/DMD/MYH11/MYL9/MYOM1/NEXN/PDLIM3/SMTN/SORBS2/SYNM/TPM1/TPM2	12
GO:0050840	extracellular matrix binding	12/980	50/16982	2.01335e-05	0.000944037	0.000808871	AGRN/COL11A1/CYR61/DCN/FBLN2/ITGA9/SHH/SLIT2/SPARCL1/SSC5D/THBS1/TINAGL1	12
GO:0003774	motor activity	21/980	132/16982	2.13831e-05	0.000949859	0.00081386	CENPE/CGNL1/DYNC1I1/KIF11/KIF13A/KIF14/KIF15/KIF18B/KIF20A/KIF22/KIF23/KIF26B/KIF2C/KIF4A/KIFC1/KIFC2/MYH11/MYH2/MYH3/MYO19/STARD9	21
GO:0044325	ion channel binding	18/980	111/16982	6.28426e-05	0.00265196	0.00227226	ABCC9/ACTN2/AKAP6/ANK2/FHL1/FLNA/FYN/ID2/KCNB1/KCND3/KCNE4/LRRK2/PDE4B/PDE4D/PKD1/RYR2/SCN4B/SLC8A1	18
GO:0005523	tropomyosin binding	6/980	14/16982	7.31396e-05	0.00293952	0.00251864	CALD1/LMOD1/LMOD3/TMOD1/TNNT1/TNNT2	6
GO:0001948	glycoprotein binding	16/980	102/16982	0.000234799	0.00900774	0.00771803	AGRN/CFH/CNTN1/DMD/FLNA/FYN/GPC6/HPSE2/LDLR/LRRK2/SELP/SHH/SLIT2/THBS1/VCL/VWF	16
GO:0035173	histone kinase activity	6/980	17/16982	0.000259491	0.00952221	0.00815884	AURKA/AURKB/CCNB1/CDK1/PRKAA2/PRKCB	6
GO:0001227	transcriptional repressor activity, RNA polymerase II transcription regulatory region sequence-specific binding	23/980	180/16982	0.000284741	0.00984288	0.0084336	ARID5B/ATF3/BTG2/CREM/ETS2/FOXP2/HAND1/JDP2/MITF/NACC2/NFATC2/NFATC4/NFE2L3/NFIL3/NR2F1/SATB1/TCF21/TSHZ3/ZBTB16/ZBTB4/ZEB1/ZEB2/ZFPM2	23
GO:0005518	collagen binding	12/980	65/16982	0.000300513	0.00984288	0.0084336	ABI3BP/COL14A1/DCN/DDR2/ITGA1/ITGA9/PCOLCE2/PODN/SMAD7/SPARCL1/THBS1/VWF	12
GO:0004114	3',5'-cyclic-nucleotide phosphodiesterase activity	7/980	24/16982	0.000303217	0.00984288	0.0084336	PDE1A/PDE1C/PDE2A/PDE4B/PDE4D/PDE5A/PDE7B	7
GO:0004674	protein serine/threonine kinase activity	44/980	446/16982	0.000363131	0.0113512	0.00972597	AKAP13/AKT3/AURKA/AURKB/BUB1/BUB1B/CAMK2A/CCNB1/CCNB2/CDC42BPA/CDK1/CIT/DCLK1/DMPK/HIPK3/ILK/LATS2/LRRK2/LTBP4/MAP3K20/MAP3K8/MAPK15/MELK/MYLK/NEK2/PELI2/PKMYT1/PLK1/PRKAA2/PRKACB/PRKAG2/PRKCB/PRKG1/RPS6KA2/RPS6KA5/SBK1/SGK1/SIK1/SNRK/SPEG/STK40/TGFBR2/TG	44
GO:0019838	growth factor binding	18/980	128/16982	0.000397593	0.0116506	0.00998252	A2M/CTGF/CYR61/DUSP1/ESM1/FGFR1/IGFBP5/IL6ST/LIFR/LTBP4/NRP2/NTRK3/PDGFRA/TGFB3/TGFBR2/TGFBR3/THBS1/WISP2	18
GO:0004112	cyclic-nucleotide phosphodiesterase activity	7/980	25/16982	0.000400318	0.0116506	0.00998252	PDE1A/PDE1C/PDE2A/PDE4B/PDE4D/PDE5A/PDE7B	7
GO:0005201	extracellular matrix structural constituent	13/980	78/16982	0.000485343	0.0136543	0.0116993	COL11A1/COL14A1/COL19A1/COL4A6/ELN/EMILIN1/FBLN2/FBN1/LAMA4/MFAP5/MGP/PRELP/TINAGL1	13
GO:0046982	protein heterodimerization activity	46/980	480/16982	0.000510414	0.0138964	0.0119068	ADCY5/AGTR1/AOC3/ATF3/AURKA/BCL2/BCL2L2/BDKRB2/CENPA/FOS/FOXP2/H2AFX/HAND1/HAND2/HIST1H2AC/HIST1H2BD/HIST1H2BK/HIST2H2BE/HIST3H2A/INHBA/JAM2/JAM3/JDP2/JUN/KCNB1/KCNK3/MEF2C/MEF2D/MEIS1/MPP7/NR4A1/NR4A2/PAFAH1B3/PBX1/RCC1/SCUBE1/SIM2/SOX17/SOX4/TCF4/TEAD1/	46
GO:0005516	calmodulin binding	23/980	190/16982	0.000619215	0.0159487	0.0136652	ASPM/ATP2B4/CACNA1C/CALD1/CAMK2A/CNN1/GEM/IQGAP3/ITPKB/MARCKSL1/MYH11/MYH2/MYH3/MYLK/PCP4/PDE1A/PDE1C/RGS1/RGS2/RYR2/RYR3/SLC8A1/SYT7	23
GO:0019199	transmembrane receptor protein kinase activity	13/980	80/16982	0.000623588	0.0159487	0.0136652	DDR2/EPHA3/EPHA7/EPHB2/FGFR1/LTBP4/NRP2/NTRK3/PDGFRA/ROR1/ROR2/TGFBR2/TGFBR3	13
GO:0001968	fibronectin binding	7/980	27/16982	0.000668332	0.0165903	0.014215	CCDC80/CTGF/IGFBP5/MYOC/SFRP2/SSC5D/THBS1	7
GO:0001085	RNA polymerase II transcription factor binding	16/980	114/16982	0.000836163	0.0201635	0.0172765	AR/EGR2/ESR1/FOS/GATA5/GATA6/IFI27/JUN/KLF4/NFATC1/PITX1/PITX2/TBX20/TCF4/TEAD1/ZFPM2	16
GO:0033613	activating transcription factor binding	11/980	64/16982	0.000993745	0.0232978	0.0199621	EGR2/FOS/HAND2/HDAC4/IFI27/JUN/MEF2C/MEF2D/MYC/PITX2/TBX20	11
GO:0030551	cyclic nucleotide binding	8/980	37/16982	0.00103098	0.0235175	0.0201503	BVES/PDE1A/PDE2A/PDE4B/PDE4D/PDE5A/PRKAR2B/PRKG1	8
GO:0043236	laminin binding	7/980	29/16982	0.00106176	0.0235822	0.0202058	AGRN/ITGA9/SHH/SLIT2/SSC5D/THBS1/TINAGL1	7
GO:0004115	3',5'-cyclic-AMP phosphodiesterase activity	5/980	15/16982	0.00116942	0.0253076	0.0216841	PDE1A/PDE2A/PDE4B/PDE4D/PDE7B	5
GO:0017166	vinculin binding	4/980	10/16982	0.00174825	0.0368881	0.0316066	DMD/SYNM/TLN1/UTRN	4
GO:0015085	calcium ion transmembrane transporter activity	17/980	135/16982	0.00198005	0.0391345	0.0335313	ATP2B4/CACNA1C/CACNA1H/CACNA2D1/CACNB2/CACNB4/DENND5A/ITPR1/ITPR3/JPH2/NCS1/PDE2A/PKD1/RYR2/RYR3/SLC24A3/SLC8A1	17
GO:0071813	lipoprotein particle binding	6/980	24/16982	0.00199382	0.0391345	0.0335313	COLEC12/GPIHBP1/LDLR/LRP8/MAPT/THBS1	6
GO:0071814	protein-lipid complex binding	6/980	24/16982	0.00199382	0.0391345	0.0335313	COLEC12/GPIHBP1/LDLR/LRP8/MAPT/THBS1	6
GO:0050431	transforming growth factor beta binding	5/980	17/16982	0.00218795	0.0419689	0.0359599	LTBP4/TGFB3/TGFBR2/TGFBR3/THBS1	5
GO:0005262	calcium channel activity	15/980	115/16982	0.00251767	0.0472203	0.0404594	CACNA1C/CACNA1H/CACNA2D1/CACNB2/CACNB4/DENND5A/ITPR1/ITPR3/JPH2/NCS1/PDE2A/PKD1/RYR2/RYR3/SLC24A3	15
